# Supplementary material for: COVID-19-related stigma and its influencing factors: a nationwide cross-sectional study during the early stage of the pandemic in China
Source: PubMed Central journal article supplement — BMJ Open. 2021 Aug 13;11(8):e048983. doi: 10.1136/bmjopen-2021-048983 (PMC8366283; doi:10.1136/bmjopen-2021-048983), 2021-08-13
Supplement: bmjopen-2021-048983.draft_revisions.pdf [file bmjopen-2021-048983.draft_revisions.pdf]

# BMJ Open

BMJ Open is committed to open peer review. As part of this commitment we make the peer review history of every article we publish publicly available.

When an article is published we post the peer reviewers' comments and the authors' responses online. We also post the versions of the paper that were used during peer review. These are the versions that the peer review comments apply to.

The versions of the paper that follow are the versions that were submitted during the peer review process. They are not the versions of record or the final published versions. They should not be cited or distributed as the published version of this manuscript.

BMJ Open is an open access journal and the full, final, typeset and author-corrected version of record of the manuscript is available on our site with no access controls, subscription charges or pay-per-view fees (<http://bmjopen.bmj.com>).

If you have any questions on BMJ Open's open peer review process please email [info.bmjopen@bmj.com](mailto:info.bmjopen@bmj.com)

# BMJ Open

## COVID-19-related stigma and its influencing factors: a nationwide cross-sectional study in China

|                               |                                                                                                                                                                                                                                                                                                                                 |
|-------------------------------|---------------------------------------------------------------------------------------------------------------------------------------------------------------------------------------------------------------------------------------------------------------------------------------------------------------------------------|
| Journal:                      | <i>BMJ Open</i>                                                                                                                                                                                                                                                                                                                 |
| Manuscript ID                 | bmjopen-2021-048983                                                                                                                                                                                                                                                                                                             |
| Article Type:                 | Original research                                                                                                                                                                                                                                                                                                               |
| Date Submitted by the Author: | 12-Jan-2021                                                                                                                                                                                                                                                                                                                     |
| Complete List of Authors:     | Jiang, Tianyu; Zhejiang University<br>Zhou, Xudong; Zhejiang University, Institute of Social and Family Medicine<br>Lin, Leesa; London School of Hygiene & Tropical Medicine<br>Pan, Yanzheng; Zhejiang University<br>Zhong, Yuyuan; Zhejiang University<br>Wang, Xiaomin; Zhejiang University<br>Zhu, Hui; Zhejiang University |
| Keywords:                     | COVID-19, MENTAL HEALTH, PUBLIC HEALTH                                                                                                                                                                                                                                                                                          |
|                               |                                                                                                                                                                                                                                                                                                                                 |

SCHOLARONE™  
Manuscripts

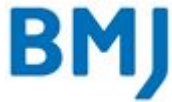

I, the Submitting Author has the right to grant and does grant on behalf of all authors of the Work (as defined in the below author licence), an exclusive licence and/or a non-exclusive licence for contributions from authors who are: i) UK Crown employees; ii) where BMJ has agreed a CC-BY licence shall apply, and/or iii) in accordance with the terms applicable for US Federal Government officers or employees acting as part of their official duties; on a worldwide, perpetual, irrevocable, royalty-free basis to BMJ Publishing Group Ltd ("BMJ") its licensees and where the relevant Journal is co-owned by BMJ to the co-owners of the Journal, to publish the Work in this journal and any other BMJ products and to exploit all rights, as set out in our [licence](#).

The Submitting Author accepts and understands that any supply made under these terms is made by BMJ to the Submitting Author unless you are acting as an employee on behalf of your employer or a postgraduate student of an affiliated institution which is paying any applicable article publishing charge ("APC") for Open Access articles. Where the Submitting Author wishes to make the Work available on an Open Access basis (and intends to pay the relevant APC), the terms of reuse of such Open Access shall be governed by a Creative Commons licence – details of these licences and which [Creative Commons](#) licence will apply to this Work are set out in our licence referred to above.

Other than as permitted in any relevant BMJ Author's Self Archiving Policies, I confirm this Work has not been accepted for publication elsewhere, is not being considered for publication elsewhere and does not duplicate material already published. I confirm all authors consent to publication of this Work and authorise the granting of this licence.

# COVID-19-related stigma and its influencing factors: a nationwide cross-sectional study in China

**Tianyu Jiang<sup>1</sup>, Xudong Zhou<sup>1</sup>, Leesa Lin<sup>2</sup>, Yanzheng Pan<sup>1</sup>, Yuyuan Zhong<sup>1</sup>, Xiaomin Wang<sup>1\*</sup>, Hui Zhu<sup>3</sup>**

1 Institute of Social Medicine, School of Medicine, Zhejiang University, Hangzhou, Zhejiang, China

2 Department of Infectious Disease Epidemiology, London School of Hygiene and Tropical Medicine, London, UK

3 School of Medicine, Zhejiang University, Hangzhou, Zhejiang, China

\* Corresponding Author:

Xiaomin Wang

Email: [xiaominwang2018@zju.edu.cn](mailto:xiaominwang2018@zju.edu.cn)

Postal address: Institute of Social Medicine, School of Medicine, Zhejiang University, 866 Yuhangtang Road, Hangzhou, Zhejiang Province, 310058, P.R.China

Phone: 86-571-88208221

Fax: 86-571-88208221

Note: Xiaomin Wang and Hui Zhu made equal contribution to this article and are both corresponding authors.

## Abstract

**Objectives :** To describe the situation of COVID-19-related stigma towards COVID-19 patients and people from the city of Wuhan in China. To assess the association of COVID-19-related stigma, health literacy, and sociodemographic characteristics.

**Design:** A cross-sectional online survey.

**Setting:** This study surveyed 31 provinces in China.

**Participants:** This study surveyed 5,039 respondents in 31 provinces in China.

**Outcome measures:** The questionnaire related to stigma towards COVID-19 patients and Wuhan residents was used. Binary logistic regressions were used to identify the factors associated with COVID-19-related stigma.

**Results :** Among the participants, 122 (2.4%) reported themselves and 254 (5.0%) reported the communities they lived in held a stigmatizing attitude towards COVID-19 patients, respectively. Additionally, 114 (2.5%) and 475 (10.3%) reported that themselves and the communities they lived in, respectively, held a stigma against people from Wuhan, where was the most severely affected area in China. People aged over 40, lived in areas with severe epidemics (aOR=2.15, 95% CI [1.12-4.13]), and who felt it difficult to find and understand information about COVID-19 (aOR=1.91, 95% CI [1.08-3.27]; aOR=1.88, 95% CI [1.08-3.29]) were more likely to stigmatize COVID-19 patients. People who were male, aged 41 to 50, and had difficulty understanding information (aOR=2.08, 95% CI [1.17-3.69]) were more likely to stigmatize people from Wuhan.

**Conclusions :** COVID-19 patients and Wuhan residents suffered stigma at both the individual and community levels. There was a correlation between better health literacy and lower stigma during the COVID-19 outbreak. Tailored interventions were encouraged to improve health literacy and consequently to reduce COVID-19-related stigma.

## Article Summary

### Strengths and limitations of this study

This was a rapid study to describe the situation of COVID-19-related stigma during the COVID-19 outbreak in China and assessed the association of stigma, health literacy and other factors.

This is a cross-sectional study with an over sample of minorities and a balance of urban and rural residents.

The survey data relies on self-reporting and participants' responses may be biased due to social desirability.

### Introduction

Stigma can be defined as a social label associating an individual with characteristics of prejudice and discrimination.<sup>1 2</sup> Individuals suffering from stigma often feel shamed, stressed and isolated, leading to negative changes in their health behaviors.<sup>3 4</sup> For example, individuals being stigmatized for a health condition may delay or avoid treatment, and may not seek access to health services, which compromises the outcome of their medical condition.<sup>5</sup>

In the field of infectious disease, stigma has been recognized as a global issue.<sup>6</sup> In recent decades, many studies concerning stigma related to infectious diseases have been conducted, including but not limited to human immunodeficiency virus (HIV),<sup>7-9</sup> tuberculosis (TB)<sup>10-12</sup> and severe acute respiratory syndrome (SARS).<sup>13 14</sup> The relationship between knowledge and stigma is well-documented for infectious diseases prevention measures that do not require social distancing. For example, people with higher education levels and HIV-related knowledge were less likely to stigmatize HIV patients.<sup>7,15</sup> This may be due to the fact that people with more HIV-related knowledge had a better understanding that they were not likely to get infected with HIV through social interactions (such as handshake, hug, and cheek kiss). However, emerging infectious diseases that are evolving in nature and have uncertain transmission patterns often cause panic among individuals and communities, as was seen with SARS, H1N1, and COVID-

1  
2  
3 19. The transmission of certain infectious diseases through social interaction can ignite stigma  
4 towards disease-related groups<sup>14</sup> following the introduction of social-distancing policies to  
5 prevent such diseases. Previous studies have noted that social distancing measures may affect  
6 the attitudes of individuals and communities towards people with stigmatizing conditions, and  
7 may lead to stigma.<sup>14 16</sup> In studies on COVID-19-related stigma, attention has been focused on  
8 the stigma towards health care workers or residents in areas with COVID-19 outbreaks.<sup>17,18</sup>  
9 However, few studies have shed light on the relationship between knowledge and stigma in  
10 emerging infectious diseases that require social distancing.  
11  
12  
13  
14  
15  
16  
17  
18  
19

20 Health literacy is usually defined as an individual's ability to obtain and process health  
21 information and take appropriate action.<sup>19</sup> Knowledge is an important dimension of health  
22 literacy.<sup>20</sup> Previous studies investigating the relationship between health literacy and stigma  
23 have mostly focused on mental illnesses and chronic diseases, and have shown that patients  
24 with low health literacy were more likely to feel stigmatized.<sup>21-23</sup> Few studies have investigated  
25 the relationship between health literacy and stigma towards infectious diseases that require  
26 social distancing in China.  
27  
28  
29  
30  
31  
32  
33  
34

35 Studies on stigma related to infectious diseases have revealed that it is not only individual  
36 patients who face stigma from infectious diseases, but can also be entire racial or ethnic groups  
37 who have or are perceived as having a higher likelihood of being infected.<sup>24</sup> Wuhan, the capital  
38 of Hubei Province, was the most severely affected area during the COVID-19 epidemic in  
39 China. In order to control the spread of COVID-19, the Chinese government took  
40 unprecedented measures, including locking down Wuhan, and requiring all Wuhan residents  
41 who migrated to other provinces before Wuhan was locked down to receive nucleic acid tests.  
42 Among the confirmed COVID-19 cases in many provinces, a considerable portion were  
43 imported cases from Wuhan.<sup>25</sup> Despite the government and media calling for tolerance, the  
44 development of a stigmatization towards residents of Wuhan was inevitable. For example, in  
45 some communities, residents of Wuhan were not allowed to enter and suffered unfair treatment.  
46 Therefore, this study aims to investigate both stigma faced by COVID-19 patients and stigma  
47 faced by residents of Wuhan.  
48  
49  
50  
51  
52  
53  
54  
55  
56  
57  
58  
59  
60

1  
2  
3 The aims of this study are 1) to describe the situation of COVID-19-related stigma during  
4 the COVID-19 outbreak in China and 2) to assess the association of stigma, health literacy, and  
5 sociodemographic characteristics during the COVID-19 epidemic.  
6  
7  
8

## 9 **Methods**

### 10 **Study design and participants**

11  
12  
13 This was a national cross-sectional survey conducted in 31 provinces, municipalities, and  
14 autonomous regions in China (except Hong Kong, Macao, and Taiwan). The questionnaire used  
15 in this survey was developed for this study (Additional file 1). Tools to measure stigma in this  
16 study were referred to a previous study published.<sup>26</sup> Two online focus groups were conducted  
17 to discuss the questionnaire design, with six people with public health and medical backgrounds  
18 in each group. Two independent experts with background in public health reviewed and further  
19 developed the questionnaire. We conducted 30 online face-to-face interviews with respondents  
20 of different ages and education levels to pre-test the questionnaire. The questionnaire included  
21 sociodemographic characteristics, COVID-19-related stigma, and health literacy during  
22 COVID-19 epidemic. We set up logic questions to check the validity of the data.  
23  
24  
25  
26  
27  
28  
29  
30  
31  
32  
33  
34

### 35 **Sample selection**

36  
37 The respondents included in this study were aged over 16 years old and could read  
38 Mandarin. We conducted convenience sampling in 31 provinces, and 100-200 families were  
39 selected from each province. The family member from each family whose birthday was closest  
40 to the survey date was asked to fill in the questionnaire to ensure randomness in sampling. We  
41 encouraged younger family members to assist elderly family members in completing the  
42 questionnaire, if necessary. We conducted over-sampling for ethnic minority groups. We also  
43 over-sampled for Wuhan, as it was the epidemic outbreak center. We intentionally balanced  
44 respondents from urban and rural areas while conducting this survey. The final effective sample  
45 size from all 31 provinces was 5,039.  
46  
47  
48  
49  
50  
51  
52  
53  
54

### 55 **Patient and public involvement**

56  
57 Patients were not involved in the design, management or reporting of this study.  
58  
59

### 60 **Data collection**



1  
2  
3 Data were collected using the web-based questionnaire that was refined by the focus  
4 groups and pre-testing process. The survey was administered from March 1 to March 16, 2020.  
5 Before the investigation, investigators received online trainings, and thusly they were  
6 responsible for quality control. Respondents could fill in the questionnaire by scanning QR  
7 codes or clicking the questionnaire link on smartphones, tablets and other mobile devices.  
8 Before filling in the questionnaire, respondents were informed that this was an anonymous  
9 study and they could participate voluntarily. This investigation did not provide compensation  
10 to the respondents. The Ethics Committee of the School of Public Health at Zhejiang University  
11 reviewed and approved this study.  
12  
13  
14  
15  
16  
17  
18  
19  
20  
21

## 22 **Data analysis**

23  
24 All data were analyzed using IBM SPSS Statistics Version 23.0 for Windows. Descriptive  
25 analyses included means for continuous variables and percentages for categorical data. Chi-  
26 square tests were conducted to compare COVID-19-related stigma between groups. Binary  
27 logistic regression analysis was used to examine the association of the independent variables  
28 with COVID-19-related stigma. All comparisons were two tailed. The significance threshold  
29 was p-value < 0.05.  
30  
31  
32  
33  
34  
35  
36

## 37 **Measurements**

### 38 *Health literacy*

39  
40 Questions on health literacy about COVID-19 were adapted from previous studies<sup>27 28</sup> and  
41 measured using two questions: (1) Do you agree that “it is difficult for me to find correct and  
42 comprehensive information about COVID-19”, (2) Do you agree that “it is difficult for me to  
43 understand information I got about COVID-19”. Each question was answered using a 5-point  
44 Likert scale ranging from 1 to 5 (1=Strongly disagree; 2=Disagree; 3=Fair; 4=Agree;  
45 5=Strongly agree).  
46  
47  
48  
49  
50  
51  
52  
53

### 54 *Stigma*

55  
56 Questions on COVID-19-related stigma were adapted from previous studies.<sup>26 29</sup> Four  
57 questions, including stigma towards COVID-19 patients and residents of Wuhan at the  
58 individual and community levels were used, respectively. The study participants who chose  
59  
60

1  
2  
3 options “Infection is their own problem...” and “I am afraid of them...” were classified as  
4  
5 “stigmatized”, those who chose options “I sympathize with them and hope to help them”, “I  
6  
7 sympathize with them, but tend to stay away from them” and “I have no special feelings” were  
8  
9 classified as “not stigmatized”.<sup>26</sup> People who lived in Wuhan were automatically exempted  
10  
11 from stigma questions related to residents of Wuhan.  
12

### 13 *Social demographic characteristics*

14  
15 The sociodemographic characteristics comprised gender, age, education, ethnicity,  
16  
17 urbanicity, and monthly household income. According to the data of confirmed COVID-19  
18  
19 cases in 31 provinces officially announced by the Chinese government as of March 1, the 31  
20  
21 provinces were divided into four areas: low case areas, low-medium case areas, medium case  
22  
23 areas, and high case areas.  
24  
25

### 26 **Results**

27  
28 A total of 5,039 participants (Table 1) with an average age of 33.0 (SD=12.5) were  
29  
30 included for analysis. Most of them were female, were of Han ethnicity, received senior high  
31  
32 school education, had a monthly household income above 705 United States dollars (USD), and  
33  
34 lived in a medium case area.  
35

36  
37 At the individual level (Table 2), the majority (70.2%) of participants reported they felt  
38  
39 compassion for and desired to help COVID-19 patients, 1,045 (20.7%) reported they felt  
40  
41 compassion for COVID-19 patients but tended to avoid them, 29(0.6%) expressed their  
42  
43 unwillingness to help COVID-19 patients, and 93(1.8%) expressed fear of COVID-19 patients.  
44  
45 Less than one percent of participants expressed their unwillingness to help residents of Wuhan  
46  
47 and 74(1.6%) expressed fear of residents of Wuhan. At the community level, 254(5.0%)  
48  
49 participants reported their communities rejected COVID-19 patients, and 475(10.3%)  
50  
51 participants reported residents of Wuhan were rejected by their communities. Approximately  
52  
53 one-third of participants reported that they had difficulties finding comprehensive and correct  
54  
55 information about COVID-19, and 759(15.0%) of the participants reported that it was difficult  
56  
57 to understand the information they received about COVID-19.  
58  
59

60 Figure 1 shows the number of cumulative confirmed COVID-19 cases from the 31

1  
2  
3 provinces on the investigation data (March 1, 2020). Figure 2 illustrates the proportion of  
4 individual stigma towards COVID-19 patients in each province. People living in Hubei, Anhui,  
5 Guizhou, Tianjin and Yunnan provinces had a relatively high stigma percentage of over 4% of  
6 the population. Figure 3 shows that more than 4% of the respondents living in Guizhou, Yunnan,  
7 and Qinghai provinces expressed a stigma towards residents of Wuhan. The proportion of  
8 reported stigma towards residents of Wuhan in Henan, Shanxi, Ningxia, Chongqing and  
9 Zhejiang provinces was between 3% and 4%.

10  
11  
12  
13  
14  
15  
16  
17  
18 As shown in Table 3, the prevalence of stigma towards COVID-19 patients among people  
19 over 50 was significantly higher than that of people under 20 (5.1% vs. 1.2%,  $p < 0.001$ ).  
20  
21  
22  
23 Compared with people who had a junior high school or lower degree, people with a college or  
24 higher degree reported lower levels of stigma towards COVID-19 patients (2.0% vs. 4.0%,  
25  $p=0.01$ ). Minorities showed a higher level of (3.6% vs. 2.2%,  $p=0.024$ ) stigma towards COVID-  
26  
27  
28  
29  
30  
31  
32  
33  
34  
35  
36  
37  
38  
39  
40  
41  
42  
43  
44  
45  
46  
47  
48  
49  
50  
51  
52  
53  
54  
55  
56  
57  
58  
59  
60  
19 patients than did Han respondents. Participants who felt it was easy to find and understand  
information about COVID-19 expressed lower stigma towards COVID-19 patients than did  
those who felt it was difficult (1.4% vs. 3.7%,  $p < 0.001$ ; 1.5% vs. 4.5%,  $p < 0.001$ ). Individual  
stigma towards residents of Wuhan was more prevalent among male than female respondents  
(3.4% vs. 1.8%,  $p < 0.001$ ) and was relatively high among those who felt it was hard to  
understand COVID-19-related information (4.4% vs. 1.8%,  $p < 0.001$ ).

Logistic regression (Table 4) indicated that participants aged over 40, who were ethnic  
minorities (aOR=2.71, 95% CI [1.67-4.38]), and who felt it was difficult to find and understand  
information about COVID-19 (aOR=1.91, 95% CI [1.08-3.27]; aOR=1.88, 95% CI [1.08-3.29])  
were more likely to stigmatize COVID-19 patients. Compared with people living in low case  
areas, people living in low-medium case areas and high case areas were 1.74 and 2.03 times  
more likely to stigmatize COVID-19 patients, respectively. Females were found to be less likely  
to stigmatize residents of Wuhan when compared with males (aOR=0.55, 95% CI [0.38-0.81]).  
Participants aged 41 to 50 and those with difficulty understanding information (aOR=2.08, 95%

1  
2  
3 CI [1.17-3.69]) were more likely to stigmatize residents of Wuhan.  
4

## 5 **Discussion**

6  
7 To our knowledge, this is the first nationwide study investigating COVID-19-related  
8 stigma in China. Our study described the situation of stigma towards COVID-19 patients and  
9 residents of Wuhan at both the individual and community levels during the epidemic.  
10  
11 Consequently, our results verified the correlation between better health literacy and lower  
12 stigma during emerging infectious diseases outbreaks and showed the difference in stigma in  
13 regions with different COVID-19 epidemic severities on a large scale across the country.  
14  
15 Additionally, we found that socio-demographic factors, such as residency, gender, age, and  
16 ethnicity, affected COVID-19-related stigma.  
17  
18  
19  
20  
21  
22  
23

24 Overall, the prevalence of stigma was low in China during the COVID-19 pandemic and  
25 most participants had a positive attitude towards COVID-19 patients and residents of Wuhan  
26 people. Noticeably, our study showed that participants reported stigma from communities was  
27 significantly higher than individual stigma, which might be affected by the social desirability  
28 effect, meaning that participants' responses concerning themselves may be biased in order to  
29 meet social expectations and moral standards. Social desirability has been identified in previous  
30 studies on measuring individual stigma towards people with mental illness.<sup>30 31</sup> Stigma from  
31 communities is not unique to China, but has also been reported in the United States, Australia,  
32 Nepal and other countries<sup>17</sup>, which deserves more attention in future studies.  
33  
34  
35  
36  
37  
38  
39  
40  
41  
42

43 Our study added to the literature by exposing the negative association between health  
44 literacy and stigma during an emerging infectious disease. Our findings verified that, during the  
45 COVID-19 pandemic, there was a significant association between health literacy and COVID-  
46 19-related stigma. Higher COVID-19-related health literacy, specifically, a better ability to find  
47 and understand information, might help reduce stigma towards COVID-19 patients and  
48 residents of Wuhan. Our findings are consistent with previous studies, which identified a  
49 correlation between health literacy and stigma on mental disease.<sup>32 33</sup> Consequently, in the field  
50 of infectious diseases, higher literacy concerning one disease may possibly help eliminate  
51 stigma. Additionally, it has been suggested that health literacy interventions, such as  
52  
53  
54  
55  
56  
57  
58  
59  
60

1  
2  
3 educational lectures to improve public knowledge and literacy, could help reduce stigma in the  
4 field of mental health.<sup>34</sup> Thus, further studies are needed to verify effective measures, such as  
5 information campaigns from health services or the media, sessions in the workplace or in  
6 schools, to reduce stigma during an emerging infectious disease.  
7  
8  
9

10  
11 In addition to health literacy, our research found that people in different regions held  
12 differing degrees of stigma towards COVID-19 patients. In general, provinces which were close  
13 to Wuhan, such as Anhui and Chongqing, and provinces with more ethnic minorities, such as  
14 Yunnan and Guizhou, had higher levels of stigma towards COVID-19 patients. Similarly, the  
15 proportion of respondents who held stigma towards residents of Wuhan was relatively high in  
16 provinces close to Wuhan, such as Henan, Chongqing and Shanxi, and provinces with more  
17 ethnic minorities such as Qinghai, Yunnan, Guizhou and Ningxia. The danger appraisal  
18 hypothesis states that an individuals' perception of danger would make them choose a safer  
19 social distance.<sup>35</sup> Another study on SARS-related stigma conducted in Hong Kong showed that  
20 living in a geographical location which was close to an area with a large number of cases could  
21 increase stigmatizing attitudes.<sup>36</sup> Specifically, residents living on the block with the most SARS  
22 patients reported holding the highest level of stigmatizing attitudes.<sup>37</sup> Similarly, in our study,  
23 people living in areas severely affected by the COVID-19 pandemic were at higher risk of social  
24 interaction with potential COVID-19 patients. Thus, they might expect to maintain a longer  
25 social distance and have less social interaction with potential COVID-19 patients, and therefore  
26 may hold higher levels of stigma.  
27  
28  
29  
30  
31  
32  
33  
34  
35  
36  
37  
38  
39  
40  
41  
42  
43  
44

45 Our study showed the influence of sociodemographic characteristics on COVID-19-related  
46 stigma, which might help identify subgroups who were more likely to stigmatize others during  
47 an infectious disease epidemic. In our study, females were more tolerant towards residents of  
48 Wuhan, while people over 40 years old and ethnic minorities were more likely to stigmatize  
49 COVID-19 patients, which is consistent with previous studies.<sup>15 31 38</sup> A previous study revealed  
50 that groups with higher education and income levels had lower levels of stigma towards patients  
51 with related diseases.<sup>22</sup> However, this difference was not found in our study. One possible  
52 reason for this may be that, during COVID-19 pandemic, China conducted a large-scale  
53  
54  
55  
56  
57  
58  
59  
60

1  
2  
3 publicity campaign through traditional and social media, such as China Central Television  
4 (CCTV), WeChat official accounts and short video platforms<sup>39</sup>, which may have helped reduce  
5 barriers related to education and economic status in accessing adequate information concerning  
6 COVID-19.  
7  
8  
9  
10

11 There are some limitations in this study. First, this is a cross-sectional study, so it can not  
12 verify the causal relationship between the stigma-related variables. Second, the research data  
13 relies on the self-reporting of survey participants. Participants' responses regarding their stigma  
14 attitudes may be biased due to social desirability.<sup>30</sup> Third, we chose a snowball sampling  
15 method rather than a representative sampling method, due to the social-distancing policies in  
16 place during our investigation. However, we over-sampled ethnic minorities and ensured both  
17 the balance of urban-rural samples and the randomness of each sample in each household during  
18 the survey to reduce related bias. Fourth, this study does not differentiate in the participants  
19 their profession or relationship to the disease. It is possible that health personnel or those who  
20 have probably been discriminated against and know the reality of the virus showed different  
21 responses, as well as people who have been infected may also show less stigma, although this  
22 part of the population in the surveyed population was low.  
23  
24  
25  
26  
27  
28  
29  
30  
31  
32  
33  
34  
35

### 36 **Conclusion**

37  
38  
39 In summary, our findings suggest that COVID-19 patients and residents of Wuhan suffered  
40 stigma at both the individual and community levels, although the proportion of respondents  
41 holding stigma was not high. Provinces closer to Wuhan had relatively higher levels of stigma  
42 towards COVID-19 patients and residents of Wuhan. There was a correlation between better  
43 health literacy and lower levels of stigma during the COVID-19 outbreak. Tailored  
44 interventions are encouraged to improve health literacy and consequently to reduce COVID-  
45 19-related stigma at both the individual and community levels, respectively.  
46  
47  
48  
49  
50  
51  
52  
53

### 54 **Declarations**

### 55 **Contributors**

56  
57 XZ, XW, and HZ made substantial contributions to the study design and supervised the data  
58 collection. TJ, LL, YZ, and YP contributed to the data collection and interpretation. TJ wrote  
59  
60

1  
2  
3 the substantial parts of manuscript. All authors critically revised, reviewed, and approved the  
4  
5 final version the manuscript.  
6

### 7 **Funding**

8  
9 This research study was supported by the National Social Science Fund of China (grant number  
10  
11 20VYJ063) and Zhejiang University Special Scientific Research Fund for COVID-19  
12  
13 Prevention and Control (grant number 2020XGZX045).  
14

15  
16 The funding body has no role in study design, data collection and analysis, decision to publish,  
17  
18 or preparation of the manuscript.  
19

### 20 **Patient consent for publication**

21  
22 Not required.  
23

### 24 **Data sharing statement**

25  
26 Data are available from the corresponding author on reasonable request.  
27

### 28 **Competing interests**

29  
30 The authors declare no conflict of interest.  
31

### 32 **Ethics approval and consent to participate**

33  
34 The protocol for this study was approved by the Ethics Committee of the School of Public  
35  
36 Health, Zhejiang University. All participants were informed of the background, aims,  
37  
38 anonymous nature and length of the survey. Participants were well informed that completing  
39  
40 the questionnaire signified their informed consent.  
41  
42

### 43 **Acknowledgements**

44  
45 We would like to thank Jiayao Xu, Yiyi Zhou, Fangyuan Jiang, Yuling Wan for their great  
46  
47 assistance to conduct this survey. We are grateful to data collectors for their work and all  
48  
49 respondents for their participation in the study. We would like to thank Xianhong Huang for  
50  
51 reviewing the data analysis.  
52

### 53 **Word count**

54  
55 2822 words  
56

### 57 **References**

58  
59 1 Henderson C, Evans-Lacko S, Thornicroft G. Mental illness stigma, help seeking, and  
60

- 1  
2  
3 public health programs. *Am J Public Health*. 2013;103(5):777-780.  
4  
5  
6 2 Pescosolido BA. The public stigma of mental illness: what do we think; what do we know;  
7 what can we prove?. *J Health Soc Behav*. 2013;54(1):1-21.  
8  
9  
10 3 Wang B, Li X, Stanton B, et al. The influence of social stigma and discriminatory  
11 experience on psychological distress and quality of life among rural-to-urban migrants in  
12 China. *Soc Sci Med*. 2010;71(1):84-92.  
13  
14  
15 4 Elliot VL, Morgan D, Kosteniuk J, et al. Health-related stigma of noncommunicable  
16 neurological disease in rural adult populations: A scoping review. *Health Soc Care*  
17 *Community*. 2019;27(4):e158-e188.  
18  
19  
20 5 Schnyder N, Panczak R, Groth N, et al. Association between mental health-related stigma  
21 and active help-seeking: systematic review and meta-analysis. *Br J Psychiatry*.  
22 2017;210(4):261-268.  
23  
24  
25 6 Ren Z, Wang H, Feng B, et al. An exploratory cross-sectional study on the impact of  
26 education on perception of stigma by Chinese patients with schizophrenia. *BMC Health*  
27 *Serv Res*. 2016;16(1):210.  
28  
29  
30 7 Balfour L, Corace K, Tasca GA, et al. High HIV knowledge relates to low stigma in  
31 pharmacists and university health science students in Guyana, South America. *Int J Infect*  
32 *Dis*. 2010;14(10):e881-e887.  
33  
34  
35 8 Zeng C, Li L, Hong YA, et al. A structural equation model of perceived and internalized  
36 stigma, depression, and suicidal status among people living with HIV/AIDS. *BMC Public*  
37 *Health*. 2018;18(1):138.  
38  
39  
40 9 Asamoah CK, Asamoah BO, Agardh A. A generation at risk: a cross-sectional study on  
41 HIV/AIDS knowledge, exposure to mass media, and stigmatizing behaviors among young  
42 women aged 15-24 years in Ghana. *Glob Health Action*. 2017;10(1):1331538.  
43  
44  
45 10 Karim F, Chowdhury AM, Islam A, et al. Stigma, Gender, and their Impact on Patients  
46 with Tuberculosis in Rural Bangladesh. *Anthropol Med*. 2007;14(2):139-151.  
47  
48  
49 11 Abebe G, Deribew A, Apers L, et al. Knowledge, health seeking behavior and perceived  
50 stigma towards tuberculosis among tuberculosis suspects in a rural community in  
51  
52  
53  
54  
55  
56  
57  
58  
59  
60



- 1  
2  
3 southwest Ethiopia. PLoS One. 2010;5(10):e13339.  
4  
5 12 Chang SH, Cataldo JK. A systematic review of global cultural variations in knowledge,  
6 attitudes and health responses to tuberculosis stigma. *Int J Tuberc Lung Dis*.  
7 2014;18(2):168-173.  
8  
9 13 Lee S, Chan LY, Chau AM, et al. The experience of SARS-related stigma at Amoy  
10 Gardens. *Soc Sci Med*. 2005;61(9):2038-2046.  
11  
12 14 Person B, Sy F, Holton K, et al; National Center for Infectious Diseases/SARS Community  
13 Outreach Team. Fear and stigma: the epidemic within the SARS outbreak. *Emerg Infect*  
14 *Dis*. 2004;10(2):358-363.  
15  
16 15 Wong LP. Prevalence and factors associated with HIV/AIDS-related stigma and  
17 discriminatory attitudes: a cross-sectional nationwide study. *Prev Med*. 2013;57  
18 *Suppl*:S60-S63.  
19  
20 16 Fischer LS, Mansergh G, Lynch J, et al. Addressing Disease-Related Stigma During  
21 Infectious Disease Outbreaks. *Disaster Med Public Health Prep*. 2019;13(5-6):989-994.  
22  
23 17 Singh R, Subedi M. COVID-19 and stigma: Social discrimination towards frontline  
24 healthcare providers and COVID-19 recovered patients in Nepal. *Asian J Psychiatr*.  
25 2020;53:102222.  
26  
27 18 Duan W, Bu H, Chen Z. COVID-19-related stigma profiles and risk factors among people  
28 who are at high risk of contagion. *Soc Sci Med*. 2020;266:113425.  
29  
30 19 Berkman ND, Sheridan SL, Donahue KE, et al. Low health literacy and health outcomes:  
31 an updated systematic review. *Ann Intern Med*. 2011;155(2):97-107.  
32  
33 20 Wei Y, McGrath PJ, Hayden J, et al. Mental health literacy measures evaluating knowledge,  
34 attitudes and help-seeking: a scoping review. *BMC Psychiatry*. 2015;15:291.  
35  
36 21 Nutbeam D. Health literacy as a public goal: a challenge for contemporary health education  
37 and communication strategies into the 21st century. *Health Promot Int*. 2000;15(3):259-  
38 267.  
39  
40 22 Johnco C, Rapee RM. Depression literacy and stigma influence how parents perceive and  
41 respond to adolescent depressive symptoms. *J Affect Disord*. 2018;241:599-607.  
42  
43  
44  
45  
46  
47  
48  
49  
50  
51  
52  
53  
54  
55  
56  
57  
58  
59  
60

- 1  
2  
3 23 Mackert M, Donovan EE, Mabry A, et al. Stigma and health literacy: an agenda for  
4 advancing research and practice. *Am J Health Behav.* 2014;38(5):690-698.  
5  
6  
7 24 Hoppe T. "Spanish Flu": When Infectious Disease Names Blur Origins and Stigmatize  
8 Those Infected. *Am J Public Health.* 2018;108(11):1462-1464.  
9  
10  
11 25 Tian S, Hu N, Lou J, et al. Characteristics of COVID-19 infection in Beijing. *J Infect.*  
12 2020;80(4):401-406.  
13  
14  
15 26 Datiko DG, Jerene D, Suarez P. Stigma matters in ending tuberculosis: Nationwide survey  
16 of stigma in Ethiopia. *BMC Public Health.* 2020;20(1):190.  
17  
18  
19 27 Wang X, Zhou X, Leesa L, et al. The Effect of Vaccine Literacy on Parental Trust and  
20 Intention to Vaccinate after a Major Vaccine Scandal. *J Health Commun.* 2018;23(5):413-  
21 421.  
22  
23  
24 28 Sørensen K, Van den Broucke S, Fullam J, et al. Health literacy and public health: a  
25 systematic review and integration of definitions and models. *BMC Public Health.*  
26 2012;12:80.  
27  
28  
29 29 Chowdhury MR, Rahman MS, Mondal MN, et al. Social Impact of Stigma Regarding  
30 Tuberculosis Hindering Adherence to Treatment: A Cross Sectional Study Involving  
31 Tuberculosis Patients in Rajshahi City, Bangladesh. *Jpn J Infect Dis.* 2015;68(6):461-466.  
32  
33  
34 30 Michaels PJ, Corrigan PW. Measuring mental illness stigma with diminished social  
35 desirability effects. *J Ment Health.* 2013;22(3):218-226.  
36  
37  
38 31 Latkin CA, Edwards C, Davey-Rothwell MA, et al. The relationship between social  
39 desirability bias and self-reports of health, substance use, and social network factors among  
40 urban substance users in Baltimore, Maryland. *Addict Behav.* 2017;73:133-136.  
41  
42  
43 32 Svensson B, Hansson L. How mental health literacy and experience of mental illness relate  
44 to stigmatizing attitudes and social distance towards people with depression or psychosis:  
45 A cross-sectional study. *Nord J Psychiatry.* 2016;70(4):309-313.  
46  
47  
48 33 Lopez V, Sanchez K, Killian MO, et al. Depression screening and education: an  
49 examination of mental health literacy and stigma in a sample of Hispanic women. *BMC*  
50 *Public Health.* 2018;18(1):646.  
51  
52  
53  
54  
55  
56  
57  
58  
59  
60

- 1  
2  
3 34 Milin R, Kutcher S, Lewis SP, et al. Impact of a Mental Health Curriculum on Knowledge  
4 and Stigma Among High School Students: A Randomized Controlled Trial. *J Am Acad*  
5 *Child Adolesc Psychiatry*. 2016;55(5):383-391.e1.  
6  
7  
8  
9 35 Balfour L, Corace K, Tasca GA, et al. High HIV knowledge relates to low stigma in  
10 pharmacists and university health science students in Guyana, South America. *Int J Infect*  
11 *Dis*. 2010;14(10):e881-e887.  
12  
13  
14 36 Lee S, Chan LY, Chau AM, et al. The experience of SARS-related stigma at Amoy  
15 Gardens. *Soc Sci Med*. 2005;61(9):2038-2046.  
16  
17  
18 37 Des Jarlais DC, Galea S, Tracy M, et al. Stigmatization of newly emerging infectious  
19 diseases: AIDS and SARS. *Am J Public Health*. 2006;96(3):561-567.  
20  
21  
22 38 Peluso Ede T, Blay SL. Public stigma in relation to individuals with depression. *J Affect*  
23 *Disord*. 2009;115(1-2):201-206.  
24  
25  
26 39 Zhong BL, Luo W, Li HM, et al. Knowledge, attitudes, and practices towards COVID-19  
27 among Chinese residents during the rapid rise period of the COVID-19 outbreak: a quick  
28 online cross-sectional survey. *Int J Biol Sci*. 2020;16(10):1745-1752.  
29  
30  
31  
32  
33  
34  
35  
36  
37  
38  
39  
40  
41  
42  
43  
44  
45  
46  
47  
48  
49  
50  
51  
52  
53  
54  
55  
56  
57  
58  
59  
60

Table 1 Sample characteristics (n=5,039)

| Variables                      | N     | %    |
|--------------------------------|-------|------|
| Age                            |       |      |
| ≤20                            | 774   | 15.4 |
| 21-30                          | 1,914 | 38.0 |
| 31-40                          | 885   | 17.6 |
| 41-50                          | 959   | 19.0 |
| ≥51                            | 507   | 10.1 |
| Gender                         |       |      |
| Male                           | 2,090 | 41.5 |
| Female                         | 2,949 | 58.5 |
| Education level                |       |      |
| Junior high school or less     | 668   | 13.3 |
| Senior high school             | 2,528 | 50.2 |
| College or above               | 1,843 | 36.6 |
| Ethnicity                      |       |      |
| Han                            | 4,234 | 84.0 |
| Minorities                     | 805   | 16.0 |
| Urbanicity                     |       |      |
| Urban                          | 2,492 | 49.5 |
| Rural                          | 2,547 | 50.5 |
| Monthly household income (USD) |       |      |
| <422                           | 846   | 16.8 |
| 422-704                        | 1,485 | 29.5 |
| 705-1,407                      | 1,422 | 28.2 |
| 1,408-2,815                    | 858   | 17.0 |
| >2,815                         | 428   | 8.5  |
| Province by confirmed patients |       |      |
| Low case area                  | 1,374 | 27.3 |
| Low-medium case area           | 1,386 | 27.5 |
| Medium case area               | 1,681 | 33.4 |
| High case area                 | 598   | 11.9 |

Table 2 Stigma and health literacy during COVID-19 epidemic

| Variables                                                                           | N     | %    |
|-------------------------------------------------------------------------------------|-------|------|
| <b>Stigma towards COVID-19 patients (n=5,039)</b>                                   |       |      |
| Statement closest to your feeling about people with COVID-19                        |       |      |
| I feel compassion and desire to help                                                | 3,536 | 70.2 |
| I feel compassion but tend to stay away from them                                   | 1,045 | 20.7 |
| It is their problem and I don't want to get COVID-19 by trying to help them         | 29    | 0.6  |
| I fear them because they may infect me                                              | 93    | 1.8  |
| I have no particular feeling                                                        | 336   | 6.7  |
| How was COVID-19 patient usually regarded/treated in your community?                |       |      |
| Most people reject him/her                                                          | 254   | 5.0  |
| Most people are friendly, but they generally try to avoid                           | 1,141 | 22.6 |
| The community mostly supports and helps him/her                                     | 725   | 14.4 |
| I don't have the experience                                                         | 2,919 | 57.9 |
| <b>Stigma towards Wuhan people (n=4,628) *</b>                                      |       |      |
| Statement closest to your feeling about Wuhan people                                |       |      |
| I feel compassion and desire to help                                                | 3,323 | 71.8 |
| I feel compassion but tend to stay away from them                                   | 883   | 19.1 |
| It is their problem and I don't want to get COVID-19 by trying to help them         | 40    | 0.9  |
| I fear them because they may infect me                                              | 74    | 1.6  |
| I have no particular feeling                                                        | 308   | 6.7  |
| How was Wuhan people usually regarded/treated in your community?                    |       |      |
| Most people reject him/her                                                          | 475   | 10.3 |
| Most people are friendly, but they generally try to avoid                           | 1,784 | 38.6 |
| The community mostly supports and helps him/her                                     | 2,097 | 45.3 |
| I don't have the experience                                                         | 272   | 5.9  |
| <b>Health literacy (n=5,039)</b>                                                    |       |      |
| It is difficult for me to find correct and comprehensive information about COVID-19 |       |      |
| Strongly disagree                                                                   | 218   | 4.3  |
| Disagree                                                                            | 1,541 | 30.6 |
| Neutral                                                                             | 1,679 | 33.3 |
| Agree                                                                               | 1,230 | 24.4 |
| Strongly agree                                                                      | 371   | 7.4  |
| It is difficult for me to understand information I got about COVID-19               |       |      |
| Strongly disagree                                                                   | 348   | 6.9  |
| Disagree                                                                            | 2,471 | 49.0 |
| Neutral                                                                             | 1,461 | 29.0 |
| Agree                                                                               | 587   | 11.6 |
| Strongly agree                                                                      | 172   | 3.4  |

\* Participants who lived in Wuhan were automatically exempted from stigma questions related to residents of Wuhan.

Table 3 Univariate analysis of individual stigma towards COVID-19 patients and Wuhan residents

| Variables                                                                           | COVID-19 patients<br>(n = 5,039) |          |         | Wuhan residents<br>(n = 4,628) * |          |         |
|-------------------------------------------------------------------------------------|----------------------------------|----------|---------|----------------------------------|----------|---------|
|                                                                                     | Stigma                           | $\chi^2$ | p-value | Stigma                           | $\chi^2$ | p-value |
| Gender                                                                              |                                  | 3.742    | 0.062   |                                  | 12.25    | <0.001  |
| Male                                                                                | 61(2.9)                          |          |         | 66(3.4)                          |          |         |
| Female                                                                              | 61(2.1)                          |          |         | 48(1.8)                          |          |         |
| Age                                                                                 |                                  | 32.43    | <0.001  |                                  | 4.053    | 0.399   |
| ≤20                                                                                 | 9(1.2)                           |          |         | 11(1.5)                          |          |         |
| 21-30                                                                               | 34(1.8)                          |          |         | 43(2.4)                          |          |         |
| 31-40                                                                               | 17(1.9)                          |          |         | 20(2.6)                          |          |         |
| 41-50                                                                               | 36(3.8)                          |          |         | 26(3.0)                          |          |         |
| ≥51                                                                                 | 26(5.1)                          |          |         | 14(3.0)                          |          |         |
| Education level                                                                     |                                  | 9.216    | 0.010   |                                  | 2.606    | 0.272   |
| Junior high school or less                                                          | 27(4.0)                          |          |         | 21(3.3)                          |          |         |
| Senior high school                                                                  | 59(2.3)                          |          |         | 59(2.5)                          |          |         |
| College or above                                                                    | 36(2.0)                          |          |         | 34(2.1)                          |          |         |
| Ethnicity                                                                           |                                  | 5.660    | 0.024   |                                  | 1.174    | 0.279   |
| Han                                                                                 | 93(2.2)                          |          |         | 90(2.4)                          |          |         |
| Minorities                                                                          | 29(3.6)                          |          |         | 24(3.0)                          |          |         |
| Urbanicity                                                                          |                                  | 0.060    | 0.855   |                                  | 0.129    | 0.720   |
| Urban                                                                               | 59(2.4)                          |          |         | 51(2.4)                          |          |         |
| Rural                                                                               | 63(2.5)                          |          |         | 63(2.5)                          |          |         |
| Monthly household Income (USD)                                                      |                                  | 5.875    | 0.209   |                                  | 0.481    | 0.975   |
| <422                                                                                | 20(2.4)                          |          |         | 20(2.4)                          |          |         |
| 422-704                                                                             | 47(3.2)                          |          |         | 38(2.7)                          |          |         |
| 705-1407                                                                            | 27(1.9)                          |          |         | 31(2.4)                          |          |         |
| 1408-2815                                                                           | 17(2.0)                          |          |         | 17(2.3)                          |          |         |
| >2815                                                                               | 11(2.6)                          |          |         | 8(2.2)                           |          |         |
| Province by confirmed patients                                                      |                                  | 4.169    | 0.244   |                                  | 2.374    | 0.498   |
| Low case area                                                                       | 24(1.7)                          |          |         | 30(2.2)                          |          |         |
| Low-medium case area                                                                | 38(2.7)                          |          |         | 41(3.0)                          |          |         |
| Medium case area                                                                    | 42(2.5)                          |          |         | 39(2.3)                          |          |         |
| High case area                                                                      | 18(3.0)                          |          |         | 4(1.9)                           |          |         |
| It is difficult for me to find correct and comprehensive information about COVID-19 |                                  | 19.21    | <0.001  |                                  | 5.448    | 0.066   |
| Disagree                                                                            | 24(1.4)                          |          |         | 30(1.8)                          |          |         |
| Neutral                                                                             | 39(2.3)                          |          |         | 39(2.5)                          |          |         |
| Agree                                                                               | 59(3.7)                          |          |         | 45(3.1)                          |          |         |
| It is difficult for me to understand information I got about COVID-19               |                                  | 25.87    | <0.001  |                                  | 16.17    | <0.001  |
| Disagree                                                                            | 43(1.5)                          |          |         | 46(1.8)                          |          |         |
| Neutral                                                                             | 45(3.1)                          |          |         | 37(2.8)                          |          |         |
| Agree                                                                               | 34(4.5)                          |          |         | 31(4.4)                          |          |         |

\* Participants who lived in Wuhan were automatically exempted from stigma questions related to residents of Wuhan.

Table 4 Factors associated with COVID-19-related stigma

|                                                                                                     | Individual stigma towards<br>COVID-19 patients (n = 5,039) |                      | Individual stigma towards<br>Wuhan residents (n = 4,628) <sup>a</sup> |                     |
|-----------------------------------------------------------------------------------------------------|------------------------------------------------------------|----------------------|-----------------------------------------------------------------------|---------------------|
|                                                                                                     | aOR (95% CI)                                               | aOR (95% CI)         | aOR (95% CI)                                                          | aOR (95% CI)        |
| Gender (Ref: Male)                                                                                  |                                                            |                      |                                                                       |                     |
| Female                                                                                              | 0.73(0.51-1.05)                                            | 0.79(0.55-1.15)      | 0.52 (0.36-0.76) **                                                   | 0.55 (0.38-0.81) ** |
| Age (Ref: ≤20)                                                                                      |                                                            |                      |                                                                       |                     |
| 21-30                                                                                               | 1.77(0.81-3.83)                                            | 1.67(0.77-3.64)      | 1.87 (0.93-3.77)                                                      | 1.80 (0.89-3.64)    |
| 31-40                                                                                               | 2.11(0.88-5.05)                                            | 2.08(0.87-5.01)      | 2.17 (0.97-4.87)                                                      | 2.14 (0.95-4.81)    |
| 41-50                                                                                               | 4.00(1.82-8.79) **                                         | 3.99(1.81-8.83) **   | 2.34 (1.09-5.04) *                                                    | 2.34 (1.09-5.05) *  |
| ≥51                                                                                                 | 5.21(2.31-11.73) ***                                       | 5.28(2.34-11.94) *** | 2.05 (0.88-4.76)                                                      | 2.03 (0.87-4.74)    |
| Educational level (Ref: Junior high school or less)                                                 |                                                            |                      |                                                                       |                     |
| Senior high school                                                                                  | 0.85(0.51-1.42)                                            | 0.96(0.57-1.60)      | 0.94 (0.54-1.65)                                                      | 1.06 (0.60-1.85)    |
| College or above                                                                                    | 0.67(0.37-1.22)                                            | 0.82(0.45-1.51)      | 0.64 (0.34-1.21)                                                      | 0.76 (0.40-1.45)    |
| Ethnicity (Ref: Han)                                                                                |                                                            |                      |                                                                       |                     |
| Minorities                                                                                          | 2.68(1.66-4.32) ***                                        | 2.71(1.67-4.38) ***  | 1.52 (0.93-2.50)                                                      | 1.52 (0.93-2.50)    |
| Urbanicity (Ref: Urban)                                                                             |                                                            |                      |                                                                       |                     |
| Rural                                                                                               | 0.86(0.58-1.28)                                            | 0.87(0.58-1.30)      | 0.97 (0.65-1.45)                                                      | 0.96 (0.64-1.44)    |
| Monthly household income (USD) (Ref: <422)                                                          |                                                            |                      |                                                                       |                     |
| 422-704                                                                                             | 1.36(0.79-2.34)                                            | 1.52(0.88-2.63)      | 1.11 (0.64-1.95)                                                      | 1.18 (0.67-2.07)    |
| 705-1407                                                                                            | 0.82(0.44-1.52)                                            | 0.95(0.51-1.77)      | 1.01 (0.56-1.83)                                                      | 1.11 (0.61-2.03)    |
| 1408-2815                                                                                           | 0.92(0.45-1.88)                                            | 1.08(0.53-2.21)      | 1.02 (0.51-2.06)                                                      | 1.14 (0.56-2.31)    |
| >2815                                                                                               | 1.23(0.55-2.76)                                            | 1.55(0.68-3.50)      | 1.00 (0.41-2.41)                                                      | 1.15 (0.48-2.80)    |
| Province by confirmed patients (Ref: Low case area)                                                 |                                                            |                      |                                                                       |                     |
| Low-medium case area                                                                                | 1.77(1.04-3.00) *                                          | 1.74(1.02-2.96) *    | 1.44 (0.88-2.34)                                                      | 1.40 (0.86-2.29)    |
| Medium case area                                                                                    | 1.64(0.96-2.79)                                            | 1.61(0.94-2.74)      | 1.10 (0.67-1.81)                                                      | 1.09 (0.66-1.80)    |
| High case area                                                                                      | 2.15(1.12-4.13) *                                          | 2.03(1.05-3.92) *    | 0.78 (0.26-2.29)                                                      | 0.78 (0.26-2.29)    |
| It is difficult for me to find correct and comprehensive information about COVID-19 (Ref: Disagree) |                                                            |                      |                                                                       |                     |
| Neutral                                                                                             |                                                            | 1.49(0.85-2.62)      |                                                                       | 1.20 (0.70-2.06)    |
| Agree                                                                                               |                                                            | 1.91(1.08-3.37) *    |                                                                       | 1.12 (0.64-1.98)    |
| It is difficult for me to understand information I got about COVID-19 (Ref: Disagree)               |                                                            |                      |                                                                       |                     |
| Neutral                                                                                             |                                                            | 1.62(1.01-2.61) *    |                                                                       | 1.40 (0.86-2.29)    |
| Agree                                                                                               |                                                            | 1.88(1.08-3.29) *    |                                                                       | 2.08 (1.17-3.69) *  |

<sup>a</sup> Participants who lived in Wuhan were automatically exempted from stigma questions related to residents of Wuhan.

\* p<0.05, \*\* p<0.01, \*\*\* p<0.001.

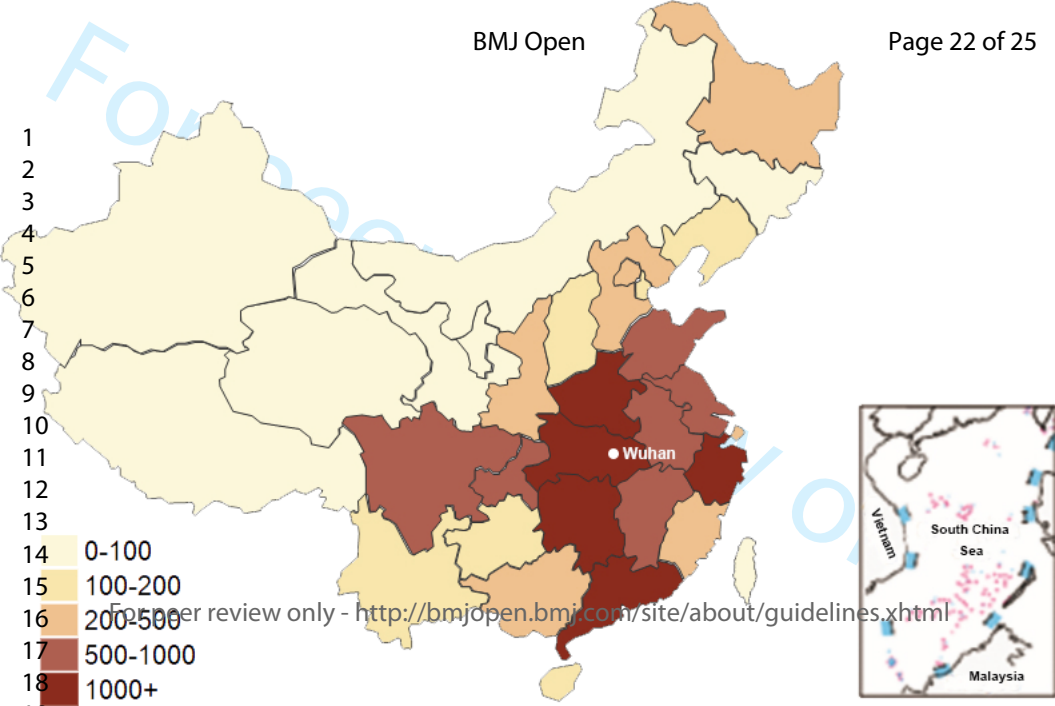



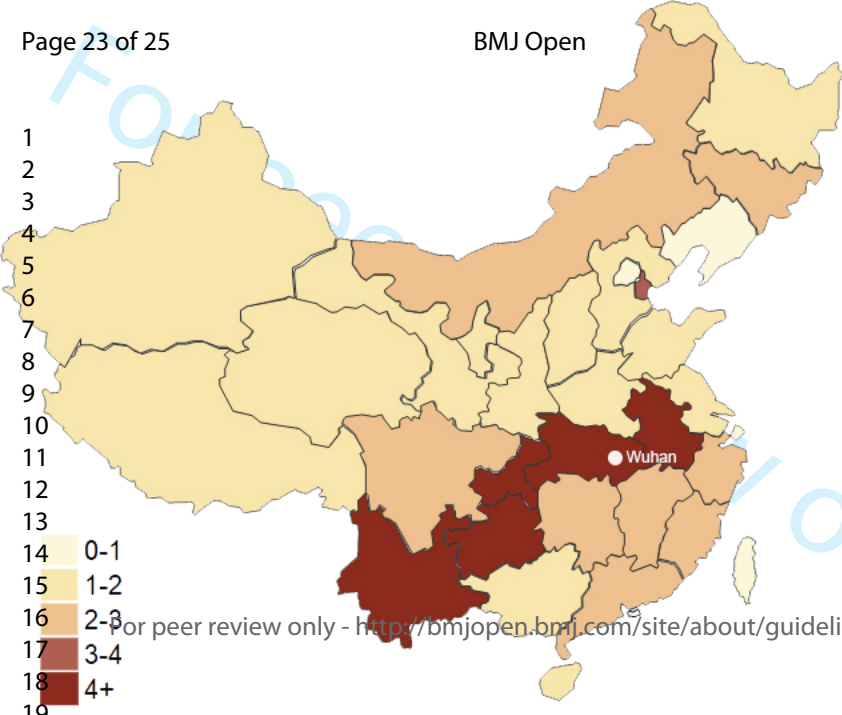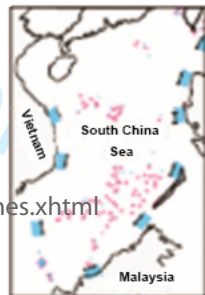

1  
2  
3  
4  
5  
6  
7  
8  
9  
10  
11  
12  
13  
14  
15  
16  
17  
18  
19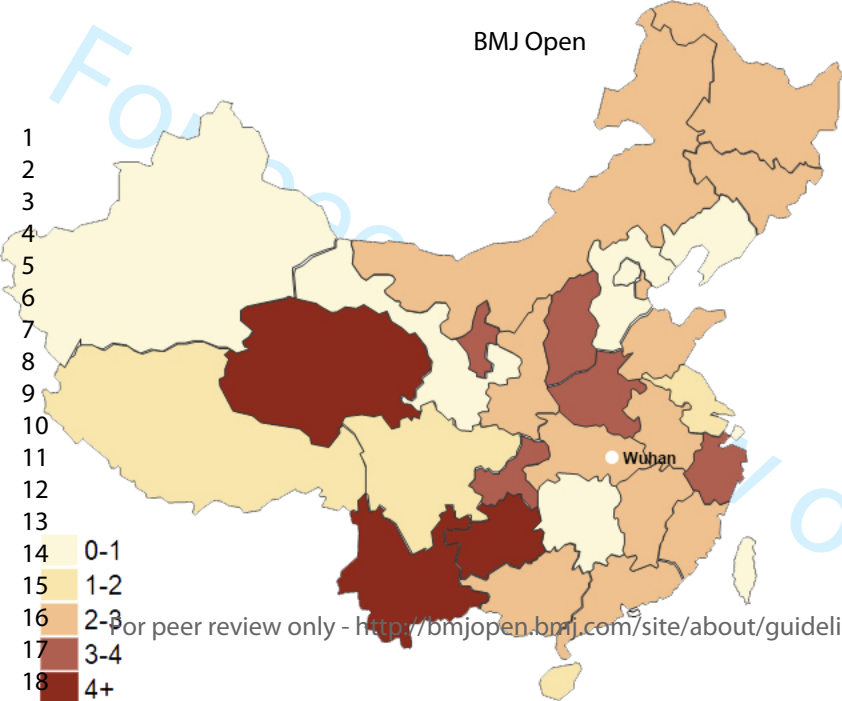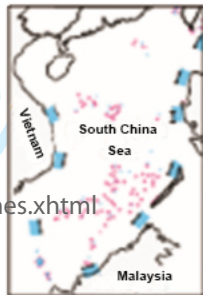

For peer review only - <http://bmjopen.bmj.com/site/about/guidelines.xhtml>

**STROBE 2007 (v4) Statement—Checklist of items that should be included in reports of *cross-sectional studies***

| Section/Topic                | Item # | Recommendation                                                                                                                                                                       | Reported on page # |
|------------------------------|--------|--------------------------------------------------------------------------------------------------------------------------------------------------------------------------------------|--------------------|
| <b>Title and abstract</b>    | 1      | (a) Indicate the study's design with a commonly used term in the title or the abstract                                                                                               | 2                  |
|                              |        | (b) Provide in the abstract an informative and balanced summary of what was done and what was found                                                                                  | 2                  |
| <b>Introduction</b>          |        |                                                                                                                                                                                      |                    |
| Background/rationale         | 2      | Explain the scientific background and rationale for the investigation being reported                                                                                                 | 3-4                |
| Objectives                   | 3      | State specific objectives, including any prespecified hypotheses                                                                                                                     | 4-5                |
| <b>Methods</b>               |        |                                                                                                                                                                                      |                    |
| Study design                 | 4      | Present key elements of study design early in the paper                                                                                                                              | 5                  |
| Setting                      | 5      | Describe the setting, locations, and relevant dates, including periods of recruitment, exposure, follow-up, and data collection                                                      | 5                  |
| Participants                 | 6      | (a) Give the eligibility criteria, and the sources and methods of selection of participants                                                                                          | 5                  |
| Variables                    | 7      | Clearly define all outcomes, exposures, predictors, potential confounders, and effect modifiers. Give diagnostic criteria, if applicable                                             | 6-7                |
| Data sources/<br>measurement | 8*     | For each variable of interest, give sources of data and details of methods of assessment (measurement). Describe comparability of assessment methods if there is more than one group | 5-6                |
| Bias                         | 9      | Describe any efforts to address potential sources of bias                                                                                                                            | 5-6                |
| Study size                   | 10     | Explain how the study size was arrived at                                                                                                                                            | 5                  |
| Quantitative variables       | 11     | Explain how quantitative variables were handled in the analyses. If applicable, describe which groupings were chosen and why                                                         | 6-7                |
| Statistical methods          | 12     | (a) Describe all statistical methods, including those used to control for confounding                                                                                                | 6-7                |
|                              |        | (b) Describe any methods used to examine subgroups and interactions                                                                                                                  | 6-7                |
|                              |        | (c) Explain how missing data were addressed                                                                                                                                          | NA                 |
|                              |        | (d) If applicable, describe analytical methods taking account of sampling strategy                                                                                                   | 6-7                |
|                              |        | (e) Describe any sensitivity analyses                                                                                                                                                | NA                 |
| <b>Results</b>               |        |                                                                                                                                                                                      |                    |

|                          |     |                                                                                                                                                                                                              |       |
|--------------------------|-----|--------------------------------------------------------------------------------------------------------------------------------------------------------------------------------------------------------------|-------|
| Participants             | 13* | (a) Report numbers of individuals at each stage of study—eg numbers potentially eligible, examined for eligibility, confirmed eligible, included in the study, completing follow-up, and analysed            | 7-8   |
|                          |     | (b) Give reasons for non-participation at each stage                                                                                                                                                         | NA    |
|                          |     | (c) Consider use of a flow diagram                                                                                                                                                                           | NA    |
| Descriptive data         | 14* | (a) Give characteristics of study participants (eg demographic, clinical, social) and information on exposures and potential confounders                                                                     | 7-8   |
|                          |     | (b) Indicate number of participants with missing data for each variable of interest                                                                                                                          | NA    |
| Outcome data             | 15* | Report numbers of outcome events or summary measures                                                                                                                                                         | 7-8   |
| Main results             | 16  | (a) Give unadjusted estimates and, if applicable, confounder-adjusted estimates and their precision (eg, 95% confidence interval). Make clear which confounders were adjusted for and why they were included | 7-8   |
|                          |     | (b) Report category boundaries when continuous variables were categorized                                                                                                                                    | 7-8   |
|                          |     | (c) If relevant, consider translating estimates of relative risk into absolute risk for a meaningful time period                                                                                             | NA    |
| Other analyses           | 17  | Report other analyses done—eg analyses of subgroups and interactions, and sensitivity analyses                                                                                                               | NA    |
| <b>Discussion</b>        |     |                                                                                                                                                                                                              |       |
| Key results              | 18  | Summarise key results with reference to study objectives                                                                                                                                                     | 8-10  |
| Limitations              | 19  | Discuss limitations of the study, taking into account sources of potential bias or imprecision. Discuss both direction and magnitude of any potential bias                                                   | 11    |
| Interpretation           | 20  | Give a cautious overall interpretation of results considering objectives, limitations, multiplicity of analyses, results from similar studies, and other relevant evidence                                   | 8-11  |
| Generalisability         | 21  | Discuss the generalisability (external validity) of the study results                                                                                                                                        | 11    |
| <b>Other information</b> |     |                                                                                                                                                                                                              |       |
| Funding                  | 22  | Give the source of funding and the role of the funders for the present study and, if applicable, for the original study on which the present article is based                                                | 11-12 |

\*Give information separately for cases and controls in case-control studies and, if applicable, for exposed and unexposed groups in cohort and cross-sectional studies.

**Note:** An Explanation and Elaboration article discusses each checklist item and gives methodological background and published examples of transparent reporting. The STROBE checklist is best used in conjunction with this article (freely available on the Web sites of PLoS Medicine at <http://www.plosmedicine.org/>, Annals of Internal Medicine at <http://www.annals.org/>, and Epidemiology at <http://www.epidem.com/>). Information on the STROBE Initiative is available at [www.strobe-statement.org](http://www.strobe-statement.org).

# BMJ Open

## COVID-19-related stigma and its influencing factors: a nationwide cross-sectional study during the early stage of the pandemic in China

|                                 |                                                                                                                                                                                                                                                                                                                                                                                                                                                                                                                                                                                                    |
|---------------------------------|----------------------------------------------------------------------------------------------------------------------------------------------------------------------------------------------------------------------------------------------------------------------------------------------------------------------------------------------------------------------------------------------------------------------------------------------------------------------------------------------------------------------------------------------------------------------------------------------------|
| Journal:                        | <i>BMJ Open</i>                                                                                                                                                                                                                                                                                                                                                                                                                                                                                                                                                                                    |
| Manuscript ID                   | bmjopen-2021-048983.R1                                                                                                                                                                                                                                                                                                                                                                                                                                                                                                                                                                             |
| Article Type:                   | Original research                                                                                                                                                                                                                                                                                                                                                                                                                                                                                                                                                                                  |
| Date Submitted by the Author:   | 29-Mar-2021                                                                                                                                                                                                                                                                                                                                                                                                                                                                                                                                                                                        |
| Complete List of Authors:       | Jiang, Tianyu; Zhejiang University, Institute of Social Medicine, School of Medicine<br>Zhou, Xudong; Zhejiang University, Institute of Social Medicine, School of Medicine<br>Lin, Leesa; London School of Hygiene & Tropical Medicine<br>Pan, Yanzheng; Zhejiang University, Institute of Social Medicine, School of Medicine<br>Zhong, Yuyuan; Zhejiang University, Institute of Social Medicine, School of Medicine<br>Wang, Xiaomin; Zhejiang University, Institute of Social Medicine, School of Medicine<br>Zhu, Hui; Zhejiang University, Institute of Social Medicine, School of Medicine |
| <b>Primary Subject Heading</b>: | Public health                                                                                                                                                                                                                                                                                                                                                                                                                                                                                                                                                                                      |
| Secondary Subject Heading:      | Public health, Health policy, Infectious diseases                                                                                                                                                                                                                                                                                                                                                                                                                                                                                                                                                  |
| Keywords:                       | COVID-19, MENTAL HEALTH, PUBLIC HEALTH                                                                                                                                                                                                                                                                                                                                                                                                                                                                                                                                                             |
|                                 |                                                                                                                                                                                                                                                                                                                                                                                                                                                                                                                                                                                                    |

SCHOLARONE™  
Manuscripts



I, the Submitting Author has the right to grant and does grant on behalf of all authors of the Work (as defined in the below author licence), an exclusive licence and/or a non-exclusive licence for contributions from authors who are: i) UK Crown employees; ii) where BMJ has agreed a CC-BY licence shall apply, and/or iii) in accordance with the terms applicable for US Federal Government officers or employees acting as part of their official duties; on a worldwide, perpetual, irrevocable, royalty-free basis to BMJ Publishing Group Ltd ("BMJ") its licensees and where the relevant Journal is co-owned by BMJ to the co-owners of the Journal, to publish the Work in this journal and any other BMJ products and to exploit all rights, as set out in our [licence](#).

The Submitting Author accepts and understands that any supply made under these terms is made by BMJ to the Submitting Author unless you are acting as an employee on behalf of your employer or a postgraduate student of an affiliated institution which is paying any applicable article publishing charge ("APC") for Open Access articles. Where the Submitting Author wishes to make the Work available on an Open Access basis (and intends to pay the relevant APC), the terms of reuse of such Open Access shall be governed by a Creative Commons licence – details of these licences and which [Creative Commons](#) licence will apply to this Work are set out in our licence referred to above.

Other than as permitted in any relevant BMJ Author's Self Archiving Policies, I confirm this Work has not been accepted for publication elsewhere, is not being considered for publication elsewhere and does not duplicate material already published. I confirm all authors consent to publication of this Work and authorise the granting of this licence.

1  
2  
3  
4 COVID-19-related stigma and its influencing  
5  
6  
7 factors: a nationwide cross-sectional study during  
8  
9  
10  
11 the early stage of the pandemic in China  
12  
13  
14

15 **Tianyu Jiang<sup>1</sup>, Xudong Zhou<sup>1</sup>, Leesa Lin<sup>2</sup>, Yanzheng Pan<sup>1</sup>, Yuyuan Zhong<sup>1</sup>, Xiaomin**

16 **Wang<sup>1\*</sup>, Hui Zhu<sup>3\*</sup>**

17  
18  
19 1 Institute of Social Medicine, School of Medicine, Zhejiang University, Hangzhou, Zhejiang,  
20  
21 China

22  
23  
24 2 Department of Infectious Disease Epidemiology, London School of Hygiene and Tropical  
25  
26 Medicine, London, UK

27  
28  
29 3 School of Medicine, Zhejiang University, Hangzhou, Zhejiang, China

30  
31  
32 \* Corresponding Author:

33  
34 Xiaomin Wang

35  
36 Email: xiaominwang2018@zju.edu.cn

37  
38  
39 Postal address: Institute of Social Medicine, School of Medicine, Zhejiang University, 866  
40  
41 Yuhangtang Road, Hangzhou, Zhejiang Province, 310058, P.R.China

42  
43  
44 Phone: 86-571-88208221

45  
46  
47 Fax: 86-571-88208221

48  
49 Note: Xiaomin Wang and Hui Zhu made equal contribution to this article and are both  
50  
51 corresponding authors.

52  
53  
54 Word count: 3645 words

## Abstract

**Objectives :** To describe the situation of COVID-19-related stigma towards COVID-19 patients and people from the city of Wuhan in China and to assess the associations between COVID-19-related stigma, health literacy, and sociodemographic characteristics during March 2020, the early stage of the pandemic.

**Design:** A cross-sectional online survey.

**Setting:** The study surveyed 31 provinces in China.

**Participants:** This study surveyed 5,039 respondents in China.

**Outcome measures:** Public stigma towards both COVID-19 patients and Wuhan residents was measured. Binary logistic regression was used to identify the factors associated with public COVID-19-related stigma.

**Results :** Among the participants, 122 (2.4%) reported themselves and 254 (5.0%) reported the communities they lived as holding a stigmatizing attitude towards COVID-19 patients, respectively. Additionally, 114 (2.5%) and 475 (10.3%) reported that themselves and the communities they lived in, respectively, held a stigma against people from Wuhan, which was the most severely affected area in China. People aged over 40, lived in areas with severe epidemics (aOR=2.03, 95% CI [1.05-3.92]), and who felt it difficult to find and understand information about COVID-19 (aOR=1.91, 95% CI [1.08-3.37]; aOR=1.88, 95% CI [1.08-3.29]) were more likely to stigmatize COVID-19 patients. People who were male, aged 41 to 50, and had difficulty understanding information (aOR=2.08, 95% CI [1.17-3.69]) were more likely to stigmatize people from Wuhan.

**Conclusions :** COVID-19 patients and Wuhan residents suffered stigma at both the individual and community levels. Those who had low health literacy, who lived in areas with a large number of COVID-19 cases, and who were ethnic minorities were more likely to stigmatize others. Tailored interventions are encouraged to improve health literacy and consequently to



1  
2  
3 reduce public COVID-19-related stigma.  
4

## 5 **Article Summary**

### 6 **Strengths and limitations of this study**

7  
8 This was a rapid study to describe the situation of public COVID-19-related stigma during the  
9  
10 early stage of the pandemic in China and assess the associations between stigma, health  
11  
12 literacy and other factors.  
13  
14

15  
16 This is a cross-sectional study with an over sampling of ethnic minorities and a balance of  
17  
18 urban and rural residents.  
19

20  
21 The survey data relies on self-reporting, and therefore participants' responses may be biased  
22  
23 due to social desirability.  
24

### 25 **Introduction**

26  
27 Stigma can be defined as a social label associating an individual with characteristics of  
28  
29 prejudice and discrimination.<sup>1,2</sup> Individuals suffering from stigma often feel shamed, stressed  
30  
31 and isolated, leading to negative changes in their health behaviors.<sup>3,4</sup> For example, individuals  
32  
33 being stigmatized for a health condition may delay or avoid treatment, and may not seek access  
34  
35 to health services, which compromises the outcome of their medical condition.<sup>5</sup>  
36

37  
38 In the field of infectious disease, stigma has been recognized as a global issue.<sup>6</sup> In recent  
39  
40 decades, many studies concerning stigma as related to infectious diseases have been conducted,  
41  
42 including but not limited to human immunodeficiency virus (HIV),<sup>7-9</sup> tuberculosis (TB)<sup>10-12</sup> and  
43  
44 severe acute respiratory syndrome (SARS).<sup>13,14</sup> The relationship between knowledge and stigma  
45  
46 is well-documented for infectious diseases prevention measures that do not require social  
47  
48 distancing. For example, people with higher education levels and HIV-related knowledge were  
49  
50 less likely to stigmatize HIV patients.<sup>7,15</sup> This may be due to the fact that people with more  
51  
52 HIV-related knowledge had a better understanding that they were not likely to get infected with  
53  
54 HIV through social interactions (such as handshake, hug, and cheek kiss). However, emerging  
55  
56 infectious diseases that are evolving in nature and have uncertain transmission patterns often  
57  
58 cause panic among individuals and communities, as was seen with SARS, H1N1, and COVID-  
59  
60

1  
2  
3 19. The transmission of certain infectious diseases through social interactions can ignite public  
4 stigma towards disease-related groups<sup>14</sup> following the introduction of social-distancing policies  
5 to prevent such diseases. Previous studies have noted that social distancing measures may affect  
6 the attitudes of individuals and communities towards people with stigmatizing conditions, and  
7 may lead to stigma.<sup>14,16</sup> In studies on COVID-19-related stigma, attention has been focused on  
8 stigma facing health care workers or residents in areas affected by the COVID-19 pandemic.<sup>17,18</sup>  
9 However, few studies have explored the relationship between knowledge and stigma in  
10 emerging infectious diseases that require social distancing.  
11  
12  
13  
14  
15  
16  
17  
18  
19

20 Health literacy is usually defined as an individual's ability to obtain and process health  
21 information and take appropriate action.<sup>19</sup> Knowledge is an important dimension of health  
22 literacy.<sup>20</sup> Previous studies investigating the relationship between health literacy and stigma  
23 have mostly focused on mental illnesses and chronic diseases, and have shown that patients  
24 with low health literacy were more likely to feel stigmatized.<sup>21-23</sup> Few studies have investigated  
25 the relationship between health literacy and stigma towards infectious diseases that require  
26 social distancing in China.  
27  
28  
29  
30  
31  
32  
33  
34

35 Studies on stigma related to infectious diseases have revealed that it is not only individual  
36 patients who face stigma from infectious diseases, but that entire racial or ethnic groups who  
37 have or are perceived as having a higher likelihood of being infected can face stigmatization.<sup>24</sup>  
38 Wuhan, the capital of Hubei Province, was the most severely affected area during the COVID-  
39 19 pandemic in China. In order to control the spread of COVID-19, the Chinese government  
40 took unprecedented measures, including locking down Wuhan, and requiring all Wuhan  
41 residents who migrated to other provinces before Wuhan was locked down to receive nucleic  
42 acid tests. A considerable portion of confirmed COVID-19 cases in many provinces were  
43 imported cases from Wuhan.<sup>25</sup> Despite the government and media calling for tolerance, the  
44 development of a stigma towards residents of Wuhan was inevitable. For example, in some  
45 communities, residents of Wuhan were not allowed to enter and suffered unfair treatment.  
46 Therefore, this study explores the situation of stigma faced by COVID-19 patients and stigma  
47 faced by residents of Wuhan.  
48  
49  
50  
51  
52  
53  
54  
55  
56  
57  
58  
59  
60

1  
2  
3 The aims of this study are 1) to describe the situation of public COVID-19-related stigma  
4 during the early stage of the COVID-19 pandemic in China and 2) to assess the associations  
5 between stigma, health literacy, and sociodemographic characteristics.  
6  
7  
8

## 9 **Methods**

### 10 **Study design and participants**

11  
12  
13 The World Health Organization (WHO) declared COVID-19 as a pandemic in March 2020,  
14 and our study was conducted between 1 March and 16 March, 2020. As of 16 March, 2020,  
15 there were more than 80,000 confirmed cases in China and more than 100,000 cases globally,  
16 and during this time people in China were under strict social-distancing policies. This was a  
17 national cross-sectional survey conducted in 31 provinces, municipalities, and autonomous  
18 regions (hereafter, provinces) in China, except for Hong Kong, Macao, and Taiwan.  
19  
20  
21  
22  
23  
24  
25

26 The questionnaire was developed for this study (Additional file 1). Tools to measure public  
27 COVID-19-related stigma were adapted from a previous study.<sup>26</sup> Two online focus groups were  
28 conducted to discuss the questionnaire design, with six people with public health and medical  
29 backgrounds in each group. Two independent experts with backgrounds in public health and  
30 risk communication reviewed and further developed the questionnaire. We conducted 30 online  
31 one-to-one interviews with respondents of different ages and education levels to pre-test the  
32 questionnaire. The final questionnaire included sociodemographic characteristics, public  
33 COVID-19-related stigma, and health literacy during the COVID-19 pandemic. Logic  
34 questions were set up to verify the validity of the data.  
35  
36  
37  
38  
39  
40  
41  
42  
43  
44

45 The respondents included in this study were aged over 16 years old and could read  
46 Mandarin. We conducted convenience sampling in 31 provinces, and 100-200 families were  
47 selected from each province. The member from each household whose birth date was closest to  
48 the survey date was invited to complete the questionnaire to ensure randomness in sampling.  
49 Younger family members were encouraged to assist elderly family members in completing the  
50 questionnaire, if necessary. Before the investigation, investigators received online trainings,  
51 and thusly they were responsible for quality control. Respondents could fill in the questionnaire  
52 by scanning QR codes or clicking the questionnaire link on smartphones, tablets and other  
53  
54  
55  
56  
57  
58  
59  
60

1  
2  
3 mobile devices. A sample size of 3,062 was estimated based on a prevalence estimate of 50%,  
4  
5 the  $\pm 2\%$  margin of error and upward adjusted by 20% considering potential non-response. We  
6  
7 set up a target sample for ethnic minorities residents and over-sampled respondents who lived  
8  
9 in Wuhan, as it was the center of the pandemic. We intentionally balanced respondents from  
10  
11 urban and rural areas while conducting this survey. Before completing the questionnaire,  
12  
13 respondents were informed in the consent statement that this was an anonymous and voluntary  
14  
15 survey. No compensation was provided to respondents. The Ethics Committee of the School of  
16  
17 Public Health at Zhejiang University reviewed and approved this study (No. ZGL202002-3).

### 18 **Patient and public involvement**

19  
20 Patients were not involved in the design, management or reporting of this study.

### 21 **Measurements**

#### 22 *Sociodemographic characteristics*

23  
24 The sociodemographic characteristics comprised gender, age, education, ethnicity,  
25  
26 urbanicity, and monthly household income. According to the data of confirmed COVID-19  
27  
28 cases in 31 provinces officially announced by the Chinese government as of 1 March, 2020, the  
29  
30 31 provinces were divided into four groups. Hubei province, the statistical outlier with the  
31  
32 highest number of confirmed cases, was classified as the high-risk group. The rest of the 30  
33  
34 provinces were divided into three groups (low-risk group, medium-risk group and medium-  
35  
36 high-risk group), with each group containing 10 provinces based on their ranking of number of  
37  
38 confirmed cases.

#### 39 *Health literacy*

40  
41 Questions on health literacy about COVID-19 were adapted from previous studies<sup>27,28</sup> and  
42  
43 measured using two questions: (1) To what extent do you agree with the following statements  
44  
45 “it is difficult for me to find correct and comprehensive information about COVID-19,” (2) To  
46  
47 what extent do you agree with the following statements “it is difficult for me to understand  
48  
49 information I got about COVID-19.” Each question was answered using a 5-point Likert scale  
50  
51 ranging from 1 to 5 (1=Strongly disagree; 2=Disagree; 3=Neutral; 4=Agree; 5=Strongly agree).

#### 52 *Stigma*

1  
2  
3 Questions on public COVID-19-related stigma were adapted from previous studies.<sup>26,29</sup>  
4  
5 Four questions, including public stigma towards COVID-19 patients and residents of Wuhan at  
6  
7 the individual and community levels were used, respectively. The study participants who chose  
8  
9 the following options: “It is their problem and I don’t want to get COVID-19 by trying to help  
10  
11 them,” and “I am afraid of them and avoid them because they may infect me,” were classified  
12  
13 as “stigmatized,” those who chose options “I feel compassion and desire to help,” “I feel  
14  
15 compassion but tend to stay away from them,” and “I have no particular feeling,” were  
16  
17 classified as “not stigmatized.”<sup>26</sup> People who lived in Wuhan were automatically exempted  
18  
19 from stigma questions related to residents of Wuhan.  
20  
21

## 22 **Data analysis**

23  
24 All data were analyzed using IBM SPSS Statistics Version 23.0 for Windows. Descriptive  
25  
26 analyses included means for continuous variables and percentages for categorical data. Chi-  
27  
28 square tests were conducted to compare COVID-19-related stigma between groups. Binary  
29  
30 Logistic regression analysis was used to examine the association of the independent variables  
31  
32 with COVID-19-related stigma. All comparisons were two-tailed. The significance threshold  
33  
34 was p-value < 0.05.  
35  
36

## 37 **Results**

38  
39 The response rate of this survey was 94.7%. Of the 5,124 participants who completed the  
40  
41 questionnaire, 85(1.7%) were excluded because they were younger than 16 years old or  
42  
43 answered logical questions incorrectly. A total of 5,039 participants (Table 1) with an average  
44  
45 age of 33.0 (SD=12.5) were included for analysis. Most of them were female, were of Han  
46  
47 ethnicity, received senior high school education, had a monthly household income above 705  
48  
49 United States dollars (USD), and lived in a medium case area.  
50  
51

52 At the individual level (Table 2), the majority (70.2%) of participants reported they felt  
53  
54 compassion for and desired to help COVID-19 patients, 1,045 (20.7%) reported they felt  
55  
56 compassion for COVID-19 patients but tended to avoid them, 29(0.6%) expressed their  
57  
58 unwillingness to help COVID-19 patients, and 93(1.8%) expressed fear of COVID-19 patients.  
59  
60 Less than one percent of participants expressed their unwillingness to help residents of Wuhan

1  
2  
3 and 74(1.6%) expressed fear of residents of Wuhan. At the community level, 254(5.0%)  
4 participants reported their communities rejected COVID-19 patients, and 475(10.3%)  
5 participants reported residents of Wuhan were rejected by their communities. Approximately  
6 one-third of participants reported that they had difficulties finding comprehensive and correct  
7 information about COVID-19, and 759(15.0%) of the participants reported that it was difficult  
8 to understand the information they received about COVID-19.  
9

10  
11  
12  
13  
14  
15  
16 Figure 1 shows the number of cumulative confirmed COVID-19 cases from the 31  
17 provinces on the investigation data (March 1, 2020). Figure 2 illustrates the proportion of  
18 individual stigma towards COVID-19 patients in each province. People living in Hubei, Anhui,  
19 Guizhou, Tianjin and Yunnan provinces had a relatively high stigma percentage of over 4% of  
20 the population. Figure 3 shows that more than 4% of the respondents living in Guizhou, Yunnan,  
21 and Qinghai provinces expressed a stigma towards residents of Wuhan. The proportion of  
22 reported stigma towards residents of Wuhan in Henan, Shanxi, Ningxia, Chongqing and  
23 Zhejiang provinces was between 3% and 4%.  
24  
25  
26  
27  
28  
29  
30  
31

32  
33 As shown in Table 3, the prevalence of stigma towards COVID-19 patients among people  
34 over 50 was significantly higher than that of people under 20 (5.1% vs. 1.2%,  $p < 0.001$ ).  
35  
36 Compared with people who had a junior high school or lower degree, people with a college or  
37 higher degree reported lower levels of stigma towards COVID-19 patients (2.0% vs. 4.0%,  
38  $p=0.01$ ). Ethnic minorities showed a higher level of (3.6% vs. 2.2%,  $p=0.024$ ) stigma towards  
39 COVID-19 patients than did Han respondents. Participants who felt it was easy to find and  
40 understand information about COVID-19 expressed lower stigma towards COVID-19 patients  
41 than did those who felt it was difficult (1.4% vs. 3.7%,  $p < 0.001$ ; 1.5% vs. 4.5%,  $p < 0.001$ ).  
42  
43 Individual stigma towards residents of Wuhan was more prevalent among male than female  
44 respondents (3.4% vs. 1.8%,  $p < 0.001$ ) and was relatively high among those who felt it was  
45 hard to understand COVID-19-related information (4.4% vs. 1.8%,  $p < 0.001$ ).  
46  
47  
48  
49  
50  
51  
52  
53  
54  
55  
56  
57  
58  
59  
60

Logistic regression (Table 4) indicated that participants aged over 40, who were ethnic

1  
2  
3 minorities (aOR=2.71, 95% CI [1.67-4.38]), and who felt it was difficult to find and understand  
4 information about COVID-19 (aOR=1.91, 95% CI [1.08-3.37]; aOR=1.88, 95% CI [1.08-3.29])  
5 were more likely to stigmatize COVID-19 patients. Compared with people living in low case  
6 areas, people living in low-medium and high case areas were 1.74 and 2.03 times more likely  
7 to stigmatize COVID-19 patients, respectively. Females were found to be less likely to  
8 stigmatize residents of Wuhan when compared with males (aOR=0.55, 95% CI [0.38-0.81]).  
9 Participants aged 41 to 50 and those with difficulty understanding information (aOR=2.08, 95%  
10 CI [1.17-3.69]) were more likely to stigmatize residents of Wuhan.

## 11 Discussion

12 To our knowledge, there are currently few studies investigating public COVID-19-related  
13 stigma during the early stage of the pandemic in China. Our study described the situation of  
14 stigma towards COVID-19 patients and residents of Wuhan at both the individual and  
15 community levels. Consequently, our results verified the correlation between better health  
16 literacy and lower stigma during a pandemic of an emerging infectious disease and showed the  
17 difference in stigma in regions with different COVID-19 epidemic severities on a large scale  
18 across China. Additionally, we identified that sociodemographic factors, such as gender, age,  
19 and ethnicity, affected public COVID-19-related stigma.

20 Historically, infectious diseases have long been associated with stigma. During the early  
21 stage of the COVID-19 pandemic, potentially deadly conditions, the lack of effective treatments,  
22 and rumors increased the risk of stigmatization. The stigma associated with COVID-19  
23 threatens the physical and mental health of COVID-19 patients and residents of Wuhan. In the  
24 long run, stigmatization also damages the cultural fabric of society and undermines efforts to  
25 control pandemics, creating an atmosphere of fear and distrust. Previous studies identified  
26 COVID-19-related public stigma as more prevalent and severe when compared with our  
27 findings. According to a global survey involving 173 countries, nearly a third of participants  
28 believed that people talked badly or gossiped about other people who were thought to associated  
29 with COVID-19, and 21.9% of participants believed people who had COVID-19 were not  
30 respected by the community.<sup>30</sup> An online survey in February 2020 in China also showed that  
31  
32  
33  
34  
35  
36  
37  
38  
39  
40  
41  
42  
43  
44  
45  
46  
47  
48  
49  
50  
51  
52  
53  
54  
55  
56  
57  
58  
59  
60

1  
2  
3 about half of participants reported they would avoid people from Hubei and 16.9% would even  
4 try to expel them from their communities.<sup>31</sup> The low prevalence of stigma in our study may be  
5 partly explained by the fact that the Chinese government began campaigns in the media to  
6 reduce stigma towards COVID-19 patients and people from Wuhan during the early stage of  
7 the pandemic.<sup>31</sup> COVID-19-related stigma is not unique to China, and has been reported in the  
8 United States, Australia, Nepal and other countries.<sup>17</sup> These facts should remind health policy  
9 makers to attach more importance to community-based stigma reduction interventions and  
10 campaigns.  
11  
12  
13  
14  
15  
16  
17  
18  
19

20 Our study added to the literature by exposing the negative association between health  
21 literacy and COVID-19-related stigma. Stigma can be understood as a human instinct to protect  
22 themselves from potentially fatal infectious diseases,<sup>32</sup> even though this instinctual response  
23 often leads to bias.<sup>33</sup> Lack of knowledge has been shown to be a major driver of these biases  
24 and stigmatizations. Previous studies on mental disease identified a negative correlation  
25 between health literacy and stigma.<sup>34,35</sup> Consequently, in the field of infectious diseases, higher  
26 literacy concerning one disease may possibly help reduce disease-related stigma. Our study  
27 suggested that higher COVID-19-related health literacy, specifically, a better ability to find and  
28 understand COVID-19 information, might help reduce stigma towards COVID-19 patients and  
29 residents of Wuhan. Additionally, it has been suggested that health literacy interventions, such  
30 as educational lectures to improve public knowledge and literacy, could help reduce stigma in  
31 the field of mental health.<sup>36</sup> Thus, further studies are needed to verify effective measures to  
32 reduce stigma during an emerging infectious disease, such as information campaigns from  
33 health services or the media, and sessions in workplaces and schools.  
34  
35  
36  
37  
38  
39  
40  
41  
42  
43  
44  
45  
46  
47  
48

49 To reduce stigma, this study described the geographic distribution of stigma during the  
50 early stage of the pandemic to improve intervention precision by allowing for the targeting of  
51 high-stigma areas. Our research found that people in different regions held differing degrees of  
52 stigmatization. In general, provinces which were close to Wuhan, such as Anhui and Chongqing,  
53 and provinces with more ethnic minorities, such as Yunnan and Guizhou, had higher levels of  
54 stigmatization. In general, provinces which were close to Wuhan, such as Anhui and Chongqing,  
55 and provinces with more ethnic minorities, such as Yunnan and Guizhou, had higher levels of  
56 stigma towards COVID-19 patients. Similarly, the proportion of respondents who held stigma  
57  
58  
59  
60



1  
2  
3 towards residents of Wuhan was relatively high in provinces close to Wuhan, such as Henan,  
4  
5 Chongqing and Shanxi, and provinces with more ethnic minorities such as Qinghai, Yunnan,  
6  
7 Guizhou and Ningxia. A study using South Korean data revealed that the risk of COVID-19  
8  
9 increased with higher area morbidity,<sup>37</sup> and the danger appraisal hypothesis stated that an  
10  
11 individuals' perception of danger would make them choose a safer social distance.<sup>38</sup> Another  
12  
13 study on SARS-related stigma conducted in Hong Kong showed that living in a geographical  
14  
15 location with a large number of cases could increase stigmatizing attitudes. Specifically,  
16  
17 residents living on the block with the most SARS patients reported holding the highest level of  
18  
19 stigmatizing attitudes.<sup>13</sup> During the COVID-19 pandemic, most countries around the world  
20  
21 reported high risk perceptions.<sup>39</sup> Similarly, in our study, people living in areas severely affected  
22  
23 by the COVID-19 pandemic were at higher risk of social interaction with potential COVID-19  
24  
25 patients. Thus, they might have higher risk perceptions, expect to have less social interaction  
26  
27 with potential COVID-19 patients, and therefore may hold higher levels of stigma. Interestingly,  
28  
29 there was no significant regional differences in attitudes towards residents of Wuhan. A  
30  
31 possible reason was that the public perceived the risk posed by COVID-19 patients to be higher  
32  
33 than that posed by residents of Wuhan.  
34  
35

36  
37 Our study also showed the influence of sociodemographic characteristics on public  
38  
39 COVID-19-related stigma, which might help identify subgroups that are more likely to  
40  
41 stigmatize others during the pandemic. Consistent with previous studies, we found females  
42  
43 were more tolerant towards residents of Wuhan, while people over 40 years old and ethnic  
44  
45 minorities were more likely to stigmatize COVID-19 patients.<sup>15,40</sup> The elderly were more likely  
46  
47 to progress to severe disease after infection or suffer complications from COVID-19 than  
48  
49 younger adults, and had higher perceived susceptibility and perceived severity during the  
50  
51 pandemic,<sup>41</sup> which might explain why the elderly were more likely to hold stigmatizing  
52  
53 attitudes. The majority of ethnic minorities in China live in less developed mountainous inland  
54  
55 or border districts in the western region, and possess relatively low levels of education and  
56  
57 income, which have been identified as negative influencing factors for stigma in previous  
58  
59 studies and may partially explain their higher levels of stigmatization.<sup>42,43</sup> A previous study  
60

1  
2  
3 revealed that groups with higher education and income levels had lower levels of stigma  
4 towards patients with related diseases.<sup>22</sup> However, this difference was not found in our study.  
5  
6 One possible reason for this may be that, during the COVID-19 pandemic, China conducted a  
7 large-scale publicity campaign through traditional and social media, such as China Central  
8 Television (CCTV), WeChat official accounts and short video platforms,<sup>44</sup> which may have  
9 helped reduce barriers related to education and economic status in accessing adequate  
10 information concerning COVID-19.  
11  
12  
13  
14  
15  
16

17  
18 There are some limitations to this study. First, this is a cross-sectional study, so it cannot  
19 verify the causal relationship between stigma-related variables. Second, this is an online survey,  
20 and people who did not have access to the Internet were not included, which may result in  
21 selection bias. However, as of December 2020, China's Internet penetration rate was 70.4%,  
22 and most people in China had access to the Internet via smartphones.<sup>45</sup> Third, health literacy  
23 and stigmatizing attitudes rely on self-reporting, and may thus lead to an underestimation of the  
24 impact of health literacy on stigma.<sup>46</sup> Fourth, we chose a snowball sampling method rather than  
25 a representative sampling method, due to the social-distancing policies in place during our  
26 investigation. However, we ensured both the balance of urban-rural samples and the  
27 randomness of each sample in each household during the survey to reduce related bias. Fifth,  
28 this study does not differentiate among participants by their profession or relationship to the  
29 disease. It is possible that health personnel or those who have been discriminated against and  
30 know the reality of the virus offered different responses, just as people who have been infected  
31 may also show less stigma (although the number of people reporting infection in our surveyed  
32 population was low).  
33  
34  
35  
36  
37  
38  
39  
40  
41  
42  
43  
44  
45  
46  
47  
48

## 49 **Conclusion**

50  
51 COVID-19 patients and residents of Wuhan have suffered stigma at both the individual  
52 and community levels. Those who had low health literacy, who lived in areas with a large  
53 number of COVID-19 cases, and who were ethnic minorities were more likely to stigmatize  
54 others in the early stage of the pandemic. Although a COVID-19 vaccine is available globally,  
55 it will still take time to achieve herd immunity. Before COVID-19 can be controlled globally,  
56  
57  
58  
59  
60

1  
2  
3 tailored interventions are encouraged to improve health literacy and consequently to reduce  
4 public COVID-19-related stigma at both the individual and community levels.  
5  
6

### 7 **Declarations**

### 8 **Contributors**

9  
10 XZ, XW, and HZ made substantial contributions to the study design and supervised the data  
11 collection. TJ, LL, YZ, and YP contributed to the data collection and interpretation. TJ wrote  
12 the substantial parts of manuscript. All authors critically revised, reviewed, and approved the  
13 final version the manuscript.  
14  
15  
16  
17  
18

### 19 **Funding**

20  
21 This research study was supported by the National Social Science Fund of China (grant number  
22 20VYJ063) and Zhejiang University Special Scientific Research Fund for COVID-19  
23 Prevention and Control (grant number 2020XGZX045).  
24  
25  
26  
27

28 The funding body has no role in study design, data collection and analysis, decision to publish,  
29 or preparation of the manuscript.  
30  
31

### 32 **Patient consent for publication**

33  
34 Not required.  
35  
36

### 37 **Data sharing statement**

38  
39 Data are available from the corresponding author on reasonable request.  
40  
41

### 42 **Competing interests**

43  
44 The authors declare no conflict of interest.  
45  
46

### 47 **Ethics approval and consent to participate**

48  
49 The protocol for this study was approved by the Ethics Committee of the School of Public  
50 Health, Zhejiang University. No. ZGL202002-3.  
51

### 52 **Acknowledgements**

53  
54 We would like to thank Jiayao Xu, Yiyi Zhou, Fangyuan Jiang, Yuling Wan for their great  
55 assistance to conduct this survey. We are grateful to data collectors for their work and all  
56 respondents for their participation in the study. We would like to thank Xianhong Huang for  
57 reviewing the data analysis.  
58  
59  
60

## References

- 1 Henderson C, Evans-Lacko S, Thornicroft G. Mental illness stigma, help seeking, and public health programs. *Am J Public Health* 2013;103(5):777-780.
- 2 Pescosolido BA. The public stigma of mental illness: what do we think; what do we know; what can we prove?. *J Health Soc Behav* 2013;54(1):1-21.
- 3 Zeng C, Li X, Du H, et al. Experiences of Stigma and Health Service Utilization among Young Rural-to-urban Migrants in China: The Mediation Role of Social Capital. *Vulnerable Child Youth Stud* 2020;15(2):97-109.
- 4 Elliot VL, Morgan D, Kosteniuk J, et al. Health-related stigma of noncommunicable neurological disease in rural adult populations: A scoping review. *Health Soc Care Community* 2019;27(4):e158-e188.
- 5 Schnyder N, Panczak R, Groth N, et al. Association between mental health-related stigma and active help-seeking: systematic review and meta-analysis. *Br J Psychiatry* 2017;210(4):261-268.
- 6 Cobos Manuel I, Jackson-Perry D, Courvoisier C, et al. Stigma and HIV: relevant for everyone. *Rev Med Suisse* 2020;16(690):744-748.
- 7 Ware KB. Assessment of Pharmacy Student Perceptions Toward Common Stigmas Associated with Persons Living with HIV. *Am J Pharm Educ* 2020;84(10):ajpe7270.
- 8 Zeng C, Li L, Hong YA, et al. A structural equation model of perceived and internalized stigma, depression, and suicidal status among people living with HIV/AIDS. *BMC Public Health* 2018;18(1):138.
- 9 Asamoah CK, Asamoah BO, Agardh A. A generation at risk: a cross-sectional study on HIV/AIDS knowledge, exposure to mass media, and stigmatizing behaviors among young women aged 15-24 years in Ghana. *Glob Health Action* 2017;10(1):1331538.
- 10 George LS, Rakesh PS, Vijayakumar K, et al. Social stigma associated with TB and HIV/AIDS among Kudumbashree members: A crosssectional study. *J Family Med Prim Care* 2020;9(8):4062-4066.
- 11 Mukerji R, Turan JM. Exploring Manifestations of TB-Related Stigma Experienced by

- 1  
2  
3 Women in Kolkata, India. *Ann Glob Health* 2018;84(4):727-735.  
4  
5  
6 12 Chang SH, Cataldo JK. A systematic review of global cultural variations in knowledge,  
7 attitudes and health responses to tuberculosis stigma. *Int J Tuberc Lung Dis*  
8 2014;18(2):168-173.  
9  
10  
11  
12 13 Lee S, Chan LY, Chau AM, et al. The experience of SARS-related stigma at Amoy  
13 Gardens. *Soc Sci Med* 2005;61(9):2038-2046.  
14  
15  
16 14 Person B, Sy F, Holton K, et al; National Center for Infectious Diseases/SARS Community  
17 Outreach Team. Fear and stigma: the epidemic within the SARS outbreak. *Emerg Infect*  
18 *Dis* 2004;10(2):358-363.  
19  
20  
21  
22 15 Wong LP. Prevalence and factors associated with HIV/AIDS-related stigma and  
23 discriminatory attitudes: a cross-sectional nationwide study. *Prev Med* 2013;57  
24 Suppl:S60-S63.  
25  
26  
27  
28 16 Fischer LS, Mansergh G, Lynch J, et al. Addressing Disease-Related Stigma During  
29 Infectious Disease Outbreaks. *Disaster Med Public Health Prep* 2019;13(5-6):989-994.  
30  
31  
32  
33 17 Singh R, Subedi M. COVID-19 and stigma: Social discrimination towards frontline  
34 healthcare providers and COVID-19 recovered patients in Nepal. *Asian J Psychiatr*  
35 2020;53:102222.  
36  
37  
38  
39 18 Duan W, Bu H, Chen Z. COVID-19-related stigma profiles and risk factors among people  
40 who are at high risk of contagion. *Soc Sci Med* 2020;266:113425.  
41  
42  
43  
44 19 Berkman ND, Sheridan SL, Donahue KE, et al. Low health literacy and health outcomes:  
45 an updated systematic review. *Ann Intern Med* 2011;155(2):97-107.  
46  
47  
48 20 Wei Y, McGrath PJ, Hayden J, et al. Mental health literacy measures evaluating knowledge,  
49 attitudes and help-seeking: a scoping review. *BMC Psychiatry* 2015;15:291.  
50  
51  
52 21 Mackert M, Mabry-Flynn A, Donovan EE, et al. Health Literacy and Perceptions of Stigma.  
53 *J Health Commun* 2019;24(11):856-864.  
54  
55  
56 22 Johnco C, Rapee RM. Depression literacy and stigma influence how parents perceive and  
57 respond to adolescent depressive symptoms. *J Affect Disord* 2018;241:599-607.  
58  
59  
60 23 Mackert M, Donovan EE, Mabry A, et al. Stigma and health literacy: an agenda for

- 1  
2  
3 advancing research and practice. *Am J Health Behav* 2014;38(5):690-698.  
4  
5 24 Hoppe T. "Spanish Flu": When Infectious Disease Names Blur Origins and Stigmatize  
6 Those Infected. *Am J Public Health* 2018;108(11):1462-1464.  
7  
8  
9 25 Tian S, Hu N, Lou J, et al. Characteristics of COVID-19 infection in Beijing. *J Infect*  
10 2020;80(4):401-406.  
11  
12  
13 26 Datiko DG, Jerene D, Suarez P. Stigma matters in ending tuberculosis: Nationwide survey  
14 of stigma in Ethiopia. *BMC Public Health* 2020;20(1):190.  
15  
16  
17 27 Wang X, Zhou X, Leesa L, et al. The Effect of Vaccine Literacy on Parental Trust and  
18 Intention to Vaccinate after a Major Vaccine Scandal. *J Health Commun* 2018;23(5):413-  
19 421.  
20  
21  
22  
23 28 Sørensen K, Van den Broucke S, Fullam J, et al. Health literacy and public health: a  
24 systematic review and integration of definitions and models. *BMC Public Health*  
25 2012;12:80.  
26  
27  
28  
29 29 Chowdhury MR, Rahman MS, Mondal MN, et al. Social Impact of Stigma Regarding  
30 Tuberculosis Hindering Adherence to Treatment: A Cross Sectional Study Involving  
31 Tuberculosis Patients in Rajshahi City, Bangladesh. *Jpn J Infect Dis* 2015;68(6):461-466.  
32  
33  
34  
35 30 Dye TD, Alcantara L, Siddiqi S, et al. Risk of COVID-19-related bullying, harassment and  
36 stigma among healthcare workers: an analytical cross-sectional global study. *BMJ Open*  
37 2020;10(12):e046620.  
38  
39  
40  
41 31 He J, He L, Zhou W, et al. Discrimination and Social Exclusion in the Outbreak of COVID-  
42 19. *Int J Environ Res Public Health* 2020;17(8):2933.  
43  
44  
45  
46 32 Bhanot D, Singh T, Verma SK, et al. Stigma and Discrimination During COVID-19  
47 Pandemic. *Front Public Health* 2021;8:577018.  
48  
49  
50  
51 33 Baldassarre A, Giorgi G, Alessio F, et al. Stigma and Discrimination (SAD) at the Time  
52 of the SARS-CoV-2 Pandemic. *Int J Environ Res Public Health* 2020;17(17):6341.  
53  
54  
55  
56 34 Svensson B, Hansson L. How mental health literacy and experience of mental illness relate  
57 to stigmatizing attitudes and social distance towards people with depression or psychosis:  
58 A cross-sectional study. *Nord J Psychiatry* 2016;70(4):309-313.  
59  
60

- 1  
2  
3 35 Lopez V, Sanchez K, Killian MO, et al. Depression screening and education: an  
4 examination of mental health literacy and stigma in a sample of Hispanic women. *BMC*  
5 *Public Health* 2018;18(1):646.  
6  
7  
8  
9  
10 36 Milin R, Kutcher S, Lewis SP, et al. Impact of a Mental Health Curriculum on Knowledge  
11 and Stigma Among High School Students: A Randomized Controlled Trial. *J Am Acad*  
12 *Child Adolesc Psychiatry* 2016;55(5):383-391.e1.  
13  
14  
15  
16 37 Weinstein B, da Silva AR, Kouzoukas DE, et al. Precision Mapping of COVID-19  
17 Vulnerable Locales by Epidemiological and Socioeconomic Risk Factors, Developed  
18 Using South Korean Data. *Int J Environ Res Public Health* 2021;18(2):604.  
19  
20  
21  
22 38 Tee YC, Earnshaw VA, Altice FL, et al. Evaluating Physicians' Intention to Discriminate  
23 Against Patients Living with HIV in Malaysia. *AIDS Behav* 2019;23(4):1039-1047.  
24  
25  
26  
27 39 Dryhurst S, Schneider CR, Kerr J, et al. Risk perceptions of COVID-19 around the world.  
28 *J Risk Res* 2020;23(7-8):994-1006.  
29  
30  
31 40 Mannarini S, Rossi A. Assessing Mental Illness Stigma: A Complex Issue. *Front Psychol*  
32 2019;9:2722.  
33  
34  
35 41 Irigoyen-Camacho ME, Velazquez-Alva MC, Zepeda-Zepeda MA, et al. Effect of Income  
36 Level and Perception of Susceptibility and Severity of COVID-19 on Stay-at-Home  
37 Preventive Behavior in a Group of Older Adults in Mexico City. *Int J Environ Res Public*  
38 *Health* 2020;17(20):7418.  
39  
40  
41  
42 42 Ransing R, Ramalho R, de Filippis R, et al. Infectious disease outbreak related stigma and  
43 discrimination during the COVID-19 pandemic: Drivers, facilitators, manifestations, and  
44 outcomes across the world. *Brain Behav Immun* 2020;89:555-558.  
45  
46  
47  
48 43 Zhang S, Lo EC, Liu J, et al. A review of the dental caries status of ethnic minority children  
49 in China. *J Immigr Minor Health* 2015;17(1):285-297.  
50  
51  
52  
53 44 Zhong BL, Luo W, Li HM, et al. Knowledge, attitudes, and practices towards COVID-19  
54 among Chinese residents during the rapid rise period of the COVID-19 outbreak: a quick  
55 online cross-sectional survey. *Int J Biol Sci* 2020;16(10):1745-1752.  
56  
57  
58  
59 45 China Internet Network Information Center. Statistical report on the development of the  
60

Internet in China, 2021. Available: [https:// http://www.cnnic.net.cn/](https://http://www.cnnic.net.cn/)

- 46 Michaels PJ, Corrigan PW. Measuring mental illness stigma with diminished social desirability effects. *J Ment Health* 2013;22(3):218-226.

### Figure legends

Figure 1 title: Number of confirmed COVID-19 cases by province

Figure 1 legend: The location of Wuhan was marked on the map.

Figure 2 title: Proportion of stigma reported towards COVID-19 patients by province (%)

Figure 2 legend: The location of Wuhan was marked on the map.

Figure 3 title: Proportion of stigma reported towards Wuhan residents by province (%)

Figure 3 legend: The location of Wuhan was marked on the map.



Table 1 Sample characteristics (n=5,039)

| Variables                             | N     | %    |
|---------------------------------------|-------|------|
| Age                                   |       |      |
| ≤20                                   | 774   | 15.4 |
| 21-30                                 | 1,914 | 38.0 |
| 31-40                                 | 885   | 17.6 |
| 41-50                                 | 959   | 19.0 |
| ≥51                                   | 507   | 10.1 |
| Gender                                |       |      |
| Male                                  | 2,090 | 41.5 |
| Female                                | 2,949 | 58.5 |
| Education level                       |       |      |
| Junior high school or less            | 668   | 13.3 |
| Senior high school and junior college | 2,528 | 50.2 |
| College and above                     | 1,843 | 36.6 |
| Ethnicity                             |       |      |
| Han                                   | 4,234 | 84.0 |
| Minorities                            | 805   | 16.0 |
| Urbanicity                            |       |      |
| Urban                                 | 2,492 | 49.5 |
| Rural                                 | 2,547 | 50.5 |
| Monthly household income (USD)        |       |      |
| <422                                  | 846   | 16.8 |
| 422-704                               | 1,485 | 29.5 |
| 705-1,407                             | 1,422 | 28.2 |
| 1,408-2,815                           | 858   | 17.0 |
| >2,815                                | 428   | 8.5  |
| Province by confirmed patients        |       |      |
| Low case area                         | 1,374 | 27.3 |
| Low-medium case area                  | 1,386 | 27.5 |
| Medium case area                      | 1,681 | 33.4 |
| High case area                        | 598   | 11.9 |

Table 2 Stigma and health literacy during COVID-19 epidemic

| Variables                                                                           | N     | %    |
|-------------------------------------------------------------------------------------|-------|------|
| <b>Stigma towards COVID-19 patients (n=5,039)</b>                                   |       |      |
| Statement closest to your feeling about people with COVID-19                        |       |      |
| I feel compassion and desire to help                                                | 3,536 | 70.2 |
| I feel compassion but tend to stay away from them                                   | 1,045 | 20.7 |
| It is their problem and I don't want to get COVID-19 by trying to help them         | 29    | 0.6  |
| I am afraid of them and avoid them because they may infect me                       | 93    | 1.8  |
| I have no particular feeling                                                        | 336   | 6.7  |
| How was COVID-19 patient usually regarded/treated in your community?                |       |      |
| Most people reject him/her                                                          | 254   | 5.0  |
| Most people are friendly, but they generally try to avoid                           | 1,141 | 22.6 |
| The community mostly supports and helps him/her                                     | 725   | 14.4 |
| I don't have the experience                                                         | 2,919 | 57.9 |
| <b>Stigma towards Wuhan people (n=4,628) *</b>                                      |       |      |
| Statement closest to your feeling about Wuhan people                                |       |      |
| I feel compassion and desire to help                                                | 3,323 | 71.8 |
| I feel compassion but tend to stay away from them                                   | 883   | 19.1 |
| It is their problem and I don't want to get COVID-19 by trying to help them         | 40    | 0.9  |
| I am afraid of them and avoid them because they may infect me                       | 74    | 1.6  |
| I have no particular feeling                                                        | 308   | 6.7  |
| How was Wuhan people usually regarded/treated in your community?                    |       |      |
| Most people reject him/her                                                          | 475   | 10.3 |
| Most people are friendly, but they generally try to avoid                           | 1,784 | 38.6 |
| The community mostly supports and helps him/her                                     | 2,097 | 45.3 |
| I don't have the experience                                                         | 272   | 5.9  |
| <b>Health literacy (n=5,039)</b>                                                    |       |      |
| It is difficult for me to find correct and comprehensive information about COVID-19 |       |      |
| Strongly disagree                                                                   | 218   | 4.3  |
| Disagree                                                                            | 1,541 | 30.6 |
| Neutral                                                                             | 1,679 | 33.3 |
| Agree                                                                               | 1,230 | 24.4 |
| Strongly agree                                                                      | 371   | 7.4  |
| It is difficult for me to understand information I got about COVID-19               |       |      |
| Strongly disagree                                                                   | 348   | 6.9  |
| Disagree                                                                            | 2,471 | 49.0 |
| Neutral                                                                             | 1,461 | 29.0 |
| Agree                                                                               | 587   | 11.6 |
| Strongly agree                                                                      | 172   | 3.4  |

\* Participants who lived in Wuhan were automatically exempted from stigma questions related to residents of Wuhan.

**Table 3 Univariate analysis of individual stigma towards COVID-19 patients and Wuhan residents**

| Variables                                                                           | COVID-19 patients<br>(n = 5,039) |          |         | Wuhan residents<br>(n = 4,628) * |          |         |
|-------------------------------------------------------------------------------------|----------------------------------|----------|---------|----------------------------------|----------|---------|
|                                                                                     | Stigma                           | $\chi^2$ | p-value | Stigma                           | $\chi^2$ | p-value |
| Gender                                                                              |                                  | 3.742    | 0.053   |                                  | 12.25    | <0.001  |
| Male                                                                                | 61(2.9)                          |          |         | 66(3.4)                          |          |         |
| Female                                                                              | 61(2.1)                          |          |         | 48(1.8)                          |          |         |
| Age                                                                                 |                                  | 32.43    | <0.001  |                                  | 4.053    | 0.399   |
| ≤20                                                                                 | 9(1.2)                           |          |         | 11(1.5)                          |          |         |
| 21-30                                                                               | 34(1.8)                          |          |         | 43(2.4)                          |          |         |
| 31-40                                                                               | 17(1.9)                          |          |         | 20(2.6)                          |          |         |
| 41-50                                                                               | 36(3.8)                          |          |         | 26(3.0)                          |          |         |
| ≥51                                                                                 | 26(5.1)                          |          |         | 14(3.0)                          |          |         |
| Education level                                                                     |                                  | 9.216    | 0.010   |                                  | 2.606    | 0.272   |
| Junior high school or less                                                          | 27(4.0)                          |          |         | 21(3.3)                          |          |         |
| Senior high school and junior college                                               | 59(2.3)                          |          |         | 59(2.5)                          |          |         |
| College and above                                                                   | 36(2.0)                          |          |         | 34(2.1)                          |          |         |
| Ethnicity                                                                           |                                  | 5.660    | 0.017   |                                  | 1.174    | 0.279   |
| Han                                                                                 | 93(2.2)                          |          |         | 90(2.4)                          |          |         |
| Minorities                                                                          | 29(3.6)                          |          |         | 24(3.0)                          |          |         |
| Urbanicity                                                                          |                                  | 0.060    | 0.807   |                                  | 0.129    | 0.720   |
| Urban                                                                               | 59(2.4)                          |          |         | 51(2.4)                          |          |         |
| Rural                                                                               | 63(2.5)                          |          |         | 63(2.5)                          |          |         |
| Monthly household Income (USD)                                                      |                                  | 5.875    | 0.209   |                                  | 0.481    | 0.975   |
| <422                                                                                | 20(2.4)                          |          |         | 20(2.4)                          |          |         |
| 422-704                                                                             | 47(3.2)                          |          |         | 38(2.7)                          |          |         |
| 705-1407                                                                            | 27(1.9)                          |          |         | 31(2.4)                          |          |         |
| 1408-2815                                                                           | 17(2.0)                          |          |         | 17(2.3)                          |          |         |
| >2815                                                                               | 11(2.6)                          |          |         | 8(2.2)                           |          |         |
| Province by confirmed patients                                                      |                                  | 4.169    | 0.244   |                                  | 2.374    | 0.498   |
| Low case area                                                                       | 24(1.7)                          |          |         | 30(2.2)                          |          |         |
| Low-medium case area                                                                | 38(2.7)                          |          |         | 41(3.0)                          |          |         |
| Medium case area                                                                    | 42(2.5)                          |          |         | 39(2.3)                          |          |         |
| High case area                                                                      | 18(3.0)                          |          |         | 4(1.9)                           |          |         |
| It is difficult for me to find correct and comprehensive information about COVID-19 |                                  | 19.21    | <0.001  |                                  | 5.448    | 0.066   |
| Disagree                                                                            | 24(1.4)                          |          |         | 30(1.8)                          |          |         |
| Neutral                                                                             | 39(2.3)                          |          |         | 39(2.5)                          |          |         |
| Agree                                                                               | 59(3.7)                          |          |         | 45(3.1)                          |          |         |
| It is difficult for me to understand information I got about COVID-19               |                                  | 25.87    | <0.001  |                                  | 16.17    | <0.001  |
| Disagree                                                                            | 43(1.5)                          |          |         | 46(1.8)                          |          |         |
| Neutral                                                                             | 45(3.1)                          |          |         | 37(2.8)                          |          |         |
| Agree                                                                               | 34(4.5)                          |          |         | 31(4.4)                          |          |         |

\* Participants who lived in Wuhan were automatically exempted from stigma questions related to residents of Wuhan.

Table 4 Factors associated with COVID-19-related stigma

|                                                                                                     | Individual stigma towards<br>COVID-19 patients (n = 5,039) |                                      | Individual stigma towards<br>Wuhan residents (n = 4,628) <sup>a</sup> |                                      |
|-----------------------------------------------------------------------------------------------------|------------------------------------------------------------|--------------------------------------|-----------------------------------------------------------------------|--------------------------------------|
|                                                                                                     | Model 1 <sup>b</sup><br>aOR (95% CI)                       | Model 2 <sup>c</sup><br>aOR (95% CI) | Model 1 <sup>b</sup><br>aOR (95% CI)                                  | Model 2 <sup>c</sup><br>aOR (95% CI) |
| Gender (Ref: Male)                                                                                  |                                                            |                                      |                                                                       |                                      |
| Female                                                                                              | 0.73(0.51-1.05)                                            | 0.79(0.55-1.15)                      | 0.52 (0.36-0.76) **                                                   | 0.55 (0.38-0.81) **                  |
| Age (Ref: ≤20)                                                                                      |                                                            |                                      |                                                                       |                                      |
| 21-30                                                                                               | 1.77(0.81-3.83)                                            | 1.67(0.77-3.64)                      | 1.87 (0.93-3.77)                                                      | 1.80 (0.89-3.64)                     |
| 31-40                                                                                               | 2.11(0.88-5.05)                                            | 2.08(0.87-5.01)                      | 2.17 (0.97-4.87)                                                      | 2.14 (0.95-4.81)                     |
| 41-50                                                                                               | 4.00(1.82-8.79) **                                         | 3.99(1.81-8.83) **                   | 2.34 (1.09-5.04) *                                                    | 2.34 (1.09-5.05) *                   |
| ≥51                                                                                                 | 5.21(2.31-11.73) ***                                       | 5.28(2.34-11.94) ***                 | 2.05 (0.88-4.76)                                                      | 2.03 (0.87-4.74)                     |
| Educational level (Ref: Junior high school or less)                                                 |                                                            |                                      |                                                                       |                                      |
| Senior high school and junior college                                                               | 0.85(0.51-1.42)                                            | 0.96(0.57-1.60)                      | 0.94 (0.54-1.65)                                                      | 1.06 (0.60-1.85)                     |
| College and above                                                                                   | 0.67(0.37-1.22)                                            | 0.82(0.45-1.51)                      | 0.64 (0.34-1.21)                                                      | 0.76 (0.40-1.45)                     |
| Ethnicity (Ref: Han)                                                                                |                                                            |                                      |                                                                       |                                      |
| Minorities                                                                                          | 2.68(1.66-4.32) ***                                        | 2.71(1.67-4.38) ***                  | 1.52 (0.93-2.50)                                                      | 1.52 (0.93-2.50)                     |
| Urbanicity (Ref: Urban)                                                                             |                                                            |                                      |                                                                       |                                      |
| Rural                                                                                               | 0.86(0.58-1.28)                                            | 0.87(0.58-1.30)                      | 0.97 (0.65-1.45)                                                      | 0.96 (0.64-1.44)                     |
| Monthly household income (USD) (Ref: <422)                                                          |                                                            |                                      |                                                                       |                                      |
| 422-704                                                                                             | 1.36(0.79-2.34)                                            | 1.52(0.88-2.63)                      | 1.11 (0.64-1.95)                                                      | 1.18 (0.67-2.07)                     |
| 705-1407                                                                                            | 0.82(0.44-1.52)                                            | 0.95(0.51-1.77)                      | 1.01 (0.56-1.83)                                                      | 1.11 (0.61-2.03)                     |
| 1408-2815                                                                                           | 0.92(0.45-1.88)                                            | 1.08(0.53-2.21)                      | 1.02 (0.51-2.06)                                                      | 1.14 (0.56-2.31)                     |
| >2815                                                                                               | 1.23(0.55-2.76)                                            | 1.55(0.68-3.50)                      | 1.00 (0.41-2.41)                                                      | 1.15 (0.48-2.80)                     |
| Province by confirmed patients (Ref: Low case area)                                                 |                                                            |                                      |                                                                       |                                      |
| Low-medium case area                                                                                | 1.77(1.04-3.00) *                                          | 1.74(1.02-2.96) *                    | 1.44 (0.88-2.34)                                                      | 1.40 (0.86-2.29)                     |
| Medium case area                                                                                    | 1.64(0.96-2.79)                                            | 1.61(0.94-2.74)                      | 1.10 (0.67-1.81)                                                      | 1.09 (0.66-1.80)                     |
| High case area                                                                                      | 2.15(1.12-4.13) *                                          | 2.03(1.05-3.92) *                    | 0.78 (0.26-2.29)                                                      | 0.78 (0.26-2.29)                     |
| It is difficult for me to find correct and comprehensive information about COVID-19 (Ref: Disagree) |                                                            |                                      |                                                                       |                                      |
| Neutral                                                                                             |                                                            | 1.49(0.85-2.62)                      |                                                                       | 1.20 (0.70-2.06)                     |
| Agree                                                                                               |                                                            | 1.91(1.08-3.37) *                    |                                                                       | 1.12 (0.64-1.98)                     |
| It is difficult for me to understand information I got about COVID-19 (Ref: Disagree)               |                                                            |                                      |                                                                       |                                      |
| Neutral                                                                                             |                                                            | 1.62(1.01-2.61) *                    |                                                                       | 1.40 (0.86-2.29)                     |
| Agree                                                                                               |                                                            | 1.88(1.08-3.29) *                    |                                                                       | 2.08 (1.17-3.69) *                   |

<sup>a</sup>Participants who lived in Wuhan were automatically exempted from stigma questions related to residents of Wuhan. <sup>b</sup>Model 1 was a Logistic regression analysis without considering the health literacy. <sup>c</sup>Model 2 included the health literacy to see the possible impact of health literacy on stigmatizing attitudes. \* p<0.05, \*\* p<0.01, \*\*\* p<0.001.

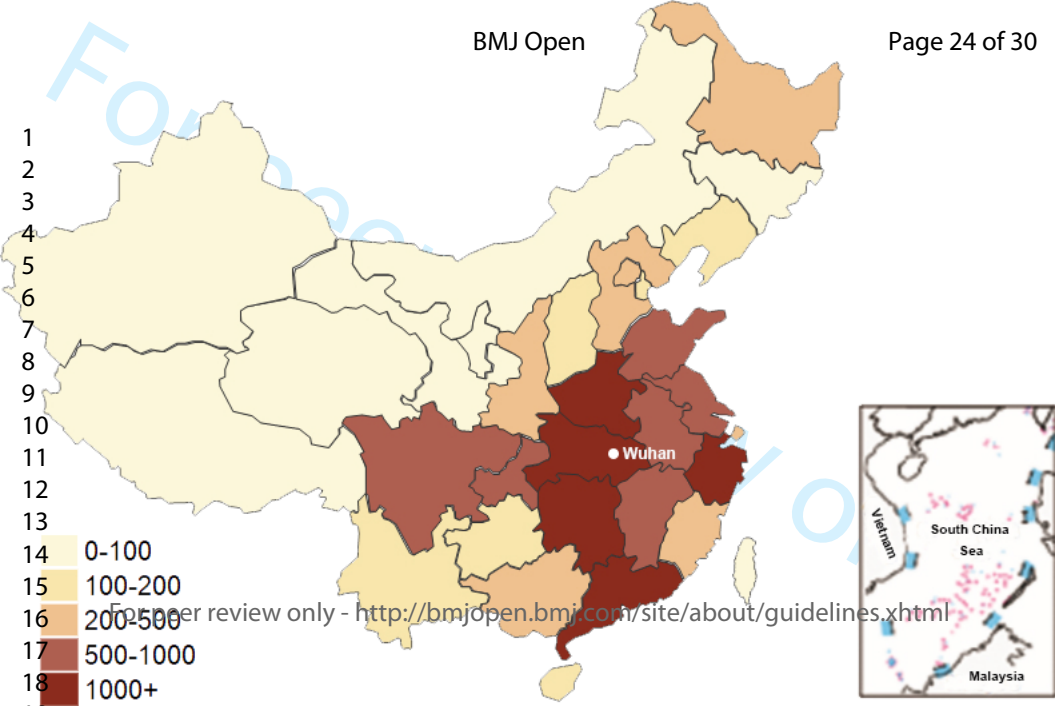

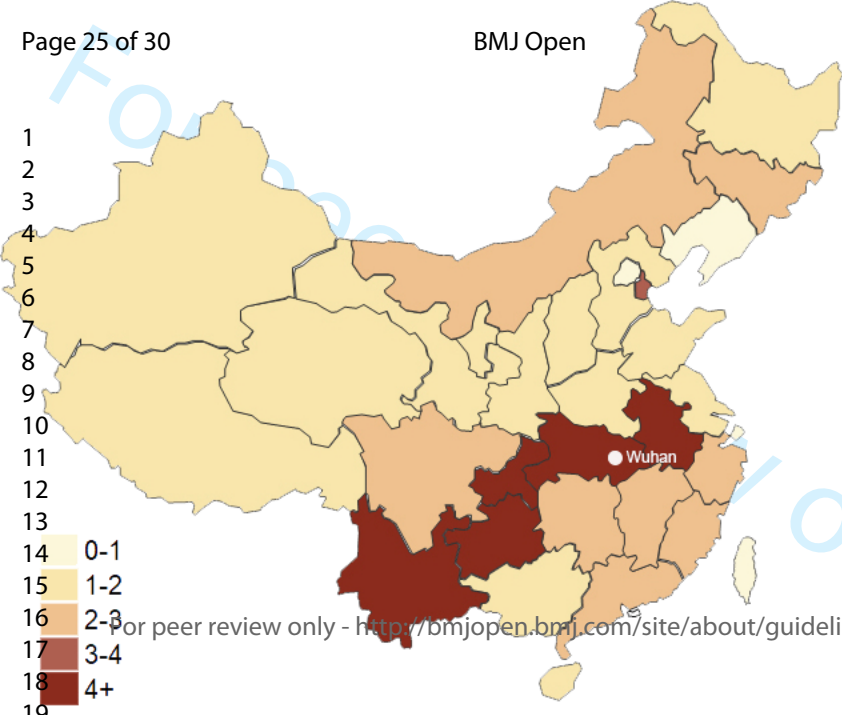

1  
2  
3  
4  
5  
6  
7  
8  
9  
10  
11  
12  
13  
14  
15  
16  
17  
18  
19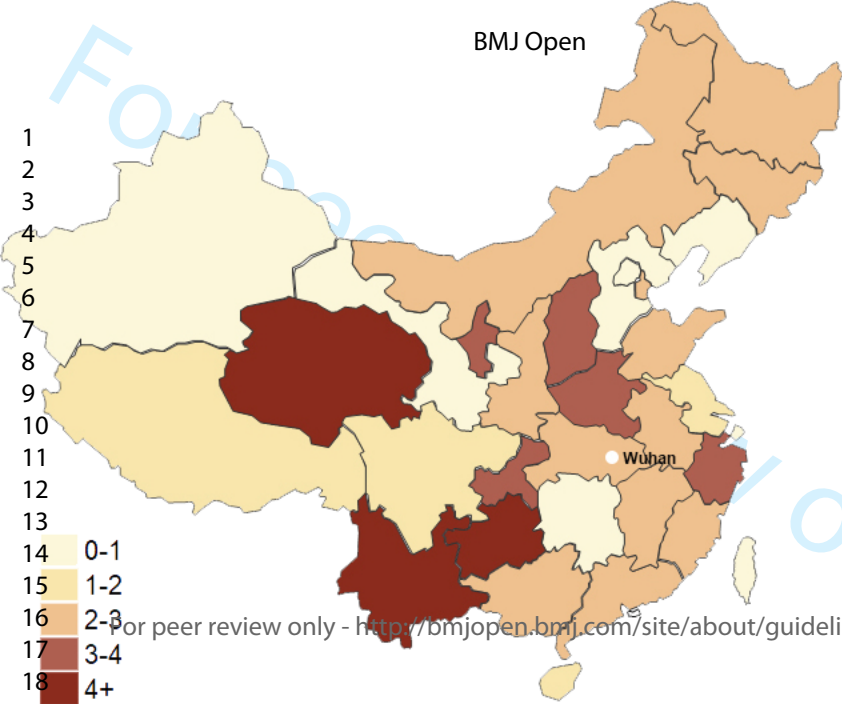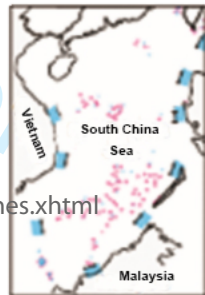

For peer review only - <http://bmjopen.bmj.com/site/about/guidelines.xhtml>

## The Questionnaire

### Part 1: The General Information

1. Gender:  Male  Female
2. Age: \_\_\_\_\_
3. Province of residence
  - Anhui  Beijing  Fujian  Gansu  Guangdong  Guangxi
  - Guizhou  Hainan  Hebei  Henan  Heilongjiang  Hubei (except Wuhan)
  - Wuhan  Hunan  Jilin  Jiangsu  Jiangxi  Liaoning
  - Inner Mongolia  Ningxia  Qinghai  Shandong  Shanxi  Shaanxi
  - Shanghai  Sichuan  Tianjin  Tibet  Xinjiang  Yunnan
  - Zhejiang  Chongqing
4. Urbanicity:  Urban  Rural
5. Ethnicity:  Han  Minorities
6. Education level:  Junior school or less  Junior high school  Senior high school
  - Junior college  College and above
7. Monthly household income:  <3000 yuan  3000-5000 yuan  5001-10000 yuan
  - 10001-20000 yuan  >20000 yuan

### Part 2: Health literacy

To what extent do you agree with the following statements?

8. It is difficult for me to find correct and comprehensive information about COVID-19.
  - Strongly disagree  Disagree  Neutral  Agree  Strongly agree
9. It is difficult for me to understand information I got about COVID-19.



1  
2  
3  
4  Strongly disagree  Disagree  Neutral  Agree  Strongly agree  
5  
6

7 **Part 3: COVID-19-related stigma**  
8

9 10. Please choose a statement that closest to your feeling about COVID-19 patients.  
10

11  I feel compassion and desire to help  
12

13  I feel compassion but tend to stay away from them  
14

15  It is their problem and I don't want to get COVID-19 by trying to help them  
16

17  I am afraid of them and avoid them because they may infect me  
18

19  I have no particular feeling  
20

21 22 23 24 25 11. How was COVID-19 patient usually regarded/treated in your community?  
26

27  Most people reject him/her  
28

29  Most people are friendly, but they generally try to avoid  
30

31  The community mostly supports and helps him/her  
32

33  I don't have the experience  
34  
35  
36  
37

38 12. Please choose a statement that closest to your feeling about Wuhan people.  
39

40  I feel compassion and desire to help  
41

42  I feel compassion but tend to stay away from them  
43

44  It is their problem and I don't want to get COVID-19 by trying to help them  
45

46  I am afraid of them and avoid them because they may infect me  
47

48  I have no particular feeling  
49  
50  
51

52 53 54 13. How was Wuhan people usually regarded/treated in your community?  
55

56  Most people reject him/her  
57

58  Most people are friendly, but they generally try to avoid  
59  
60

1  
2  
3  
4  
5  
6  
7  
8  
9  
10  
11  
12  
13  
14  
15  
16  
17  
18  
19  
20  
21  
22  
23  
24  
25  
26  
27  
28  
29  
30  
31  
32  
33  
34  
35  
36  
37  
38  
39  
40  
41  
42  
43  
44  
45  
46  
47  
48  
49  
50  
51  
52  
53  
54  
55  
56  
57  
58  
59  
60

The community mostly supports and helps him/her

I don't have the experience

For peer review only

**STROBE 2007 (v4) Statement—Checklist of items that should be included in reports of *cross-sectional studies***

| Section/Topic                | Item # | Recommendation                                                                                                                                                                       | Reported on page # |
|------------------------------|--------|--------------------------------------------------------------------------------------------------------------------------------------------------------------------------------------|--------------------|
| <b>Title and abstract</b>    | 1      | (a) Indicate the study's design with a commonly used term in the title or the abstract                                                                                               | 2                  |
|                              |        | (b) Provide in the abstract an informative and balanced summary of what was done and what was found                                                                                  | 2                  |
| <b>Introduction</b>          |        |                                                                                                                                                                                      |                    |
| Background/rationale         | 2      | Explain the scientific background and rationale for the investigation being reported                                                                                                 | 3-4                |
| Objectives                   | 3      | State specific objectives, including any prespecified hypotheses                                                                                                                     | 4-5                |
| <b>Methods</b>               |        |                                                                                                                                                                                      |                    |
| Study design                 | 4      | Present key elements of study design early in the paper                                                                                                                              | 5                  |
| Setting                      | 5      | Describe the setting, locations, and relevant dates, including periods of recruitment, exposure, follow-up, and data collection                                                      | 5                  |
| Participants                 | 6      | (a) Give the eligibility criteria, and the sources and methods of selection of participants                                                                                          | 5                  |
| Variables                    | 7      | Clearly define all outcomes, exposures, predictors, potential confounders, and effect modifiers. Give diagnostic criteria, if applicable                                             | 6-7                |
| Data sources/<br>measurement | 8*     | For each variable of interest, give sources of data and details of methods of assessment (measurement). Describe comparability of assessment methods if there is more than one group | 5-6                |
| Bias                         | 9      | Describe any efforts to address potential sources of bias                                                                                                                            | 5-6                |
| Study size                   | 10     | Explain how the study size was arrived at                                                                                                                                            | 5                  |
| Quantitative variables       | 11     | Explain how quantitative variables were handled in the analyses. If applicable, describe which groupings were chosen and why                                                         | 6-7                |
| Statistical methods          | 12     | (a) Describe all statistical methods, including those used to control for confounding                                                                                                | 6-7                |
|                              |        | (b) Describe any methods used to examine subgroups and interactions                                                                                                                  | 6-7                |
|                              |        | (c) Explain how missing data were addressed                                                                                                                                          | NA                 |
|                              |        | (d) If applicable, describe analytical methods taking account of sampling strategy                                                                                                   | 6-7                |
|                              |        | (e) Describe any sensitivity analyses                                                                                                                                                | NA                 |
| <b>Results</b>               |        |                                                                                                                                                                                      |                    |

|                          |     |                                                                                                                                                                                                              |       |
|--------------------------|-----|--------------------------------------------------------------------------------------------------------------------------------------------------------------------------------------------------------------|-------|
| Participants             | 13* | (a) Report numbers of individuals at each stage of study—eg numbers potentially eligible, examined for eligibility, confirmed eligible, included in the study, completing follow-up, and analysed            | 7-8   |
|                          |     | (b) Give reasons for non-participation at each stage                                                                                                                                                         | NA    |
|                          |     | (c) Consider use of a flow diagram                                                                                                                                                                           | NA    |
| Descriptive data         | 14* | (a) Give characteristics of study participants (eg demographic, clinical, social) and information on exposures and potential confounders                                                                     | 7-8   |
|                          |     | (b) Indicate number of participants with missing data for each variable of interest                                                                                                                          | NA    |
| Outcome data             | 15* | Report numbers of outcome events or summary measures                                                                                                                                                         | 7-8   |
| Main results             | 16  | (a) Give unadjusted estimates and, if applicable, confounder-adjusted estimates and their precision (eg, 95% confidence interval). Make clear which confounders were adjusted for and why they were included | 7-8   |
|                          |     | (b) Report category boundaries when continuous variables were categorized                                                                                                                                    | 7-8   |
|                          |     | (c) If relevant, consider translating estimates of relative risk into absolute risk for a meaningful time period                                                                                             | NA    |
| Other analyses           | 17  | Report other analyses done—eg analyses of subgroups and interactions, and sensitivity analyses                                                                                                               | NA    |
| <b>Discussion</b>        |     |                                                                                                                                                                                                              |       |
| Key results              | 18  | Summarise key results with reference to study objectives                                                                                                                                                     | 8-10  |
| Limitations              | 19  | Discuss limitations of the study, taking into account sources of potential bias or imprecision. Discuss both direction and magnitude of any potential bias                                                   | 11    |
| Interpretation           | 20  | Give a cautious overall interpretation of results considering objectives, limitations, multiplicity of analyses, results from similar studies, and other relevant evidence                                   | 8-11  |
| Generalisability         | 21  | Discuss the generalisability (external validity) of the study results                                                                                                                                        | 11    |
| <b>Other information</b> |     |                                                                                                                                                                                                              |       |
| Funding                  | 22  | Give the source of funding and the role of the funders for the present study and, if applicable, for the original study on which the present article is based                                                | 11-12 |

\*Give information separately for cases and controls in case-control studies and, if applicable, for exposed and unexposed groups in cohort and cross-sectional studies.

**Note:** An Explanation and Elaboration article discusses each checklist item and gives methodological background and published examples of transparent reporting. The STROBE checklist is best used in conjunction with this article (freely available on the Web sites of PLoS Medicine at <http://www.plosmedicine.org/>, Annals of Internal Medicine at <http://www.annals.org/>, and Epidemiology at <http://www.epidem.com/>). Information on the STROBE Initiative is available at [www.strobe-statement.org](http://www.strobe-statement.org).

# BMJ Open

## COVID-19-related stigma and its influencing factors: a nationwide cross-sectional study during the early stage of the pandemic in China

|                                 |                                                                                                                                                                                                                                                                                                                                                                                                                                                                                                                                                                                                    |
|---------------------------------|----------------------------------------------------------------------------------------------------------------------------------------------------------------------------------------------------------------------------------------------------------------------------------------------------------------------------------------------------------------------------------------------------------------------------------------------------------------------------------------------------------------------------------------------------------------------------------------------------|
| Journal:                        | <i>BMJ Open</i>                                                                                                                                                                                                                                                                                                                                                                                                                                                                                                                                                                                    |
| Manuscript ID                   | bmjopen-2021-048983.R2                                                                                                                                                                                                                                                                                                                                                                                                                                                                                                                                                                             |
| Article Type:                   | Original research                                                                                                                                                                                                                                                                                                                                                                                                                                                                                                                                                                                  |
| Date Submitted by the Author:   | 27-Jul-2021                                                                                                                                                                                                                                                                                                                                                                                                                                                                                                                                                                                        |
| Complete List of Authors:       | Jiang, Tianyu; Zhejiang University, Institute of Social Medicine, School of Medicine<br>Zhou, Xudong; Zhejiang University, Institute of Social Medicine, School of Medicine<br>Lin, Leesa; London School of Hygiene & Tropical Medicine<br>Pan, Yanzheng; Zhejiang University, Institute of Social Medicine, School of Medicine<br>Zhong, Yuyuan; Zhejiang University, Institute of Social Medicine, School of Medicine<br>Wang, Xiaomin; Zhejiang University, Institute of Social Medicine, School of Medicine<br>Zhu, Hui; Zhejiang University, Institute of Social Medicine, School of Medicine |
| <b>Primary Subject Heading</b>: | Public health                                                                                                                                                                                                                                                                                                                                                                                                                                                                                                                                                                                      |
| Secondary Subject Heading:      | Public health, Health policy, Infectious diseases                                                                                                                                                                                                                                                                                                                                                                                                                                                                                                                                                  |
| Keywords:                       | COVID-19, MENTAL HEALTH, PUBLIC HEALTH                                                                                                                                                                                                                                                                                                                                                                                                                                                                                                                                                             |
|                                 |                                                                                                                                                                                                                                                                                                                                                                                                                                                                                                                                                                                                    |

SCHOLARONE™  
Manuscripts



I, the Submitting Author has the right to grant and does grant on behalf of all authors of the Work (as defined in the below author licence), an exclusive licence and/or a non-exclusive licence for contributions from authors who are: i) UK Crown employees; ii) where BMJ has agreed a CC-BY licence shall apply, and/or iii) in accordance with the terms applicable for US Federal Government officers or employees acting as part of their official duties; on a worldwide, perpetual, irrevocable, royalty-free basis to BMJ Publishing Group Ltd ("BMJ") its licensees and where the relevant Journal is co-owned by BMJ to the co-owners of the Journal, to publish the Work in this journal and any other BMJ products and to exploit all rights, as set out in our [licence](#).

The Submitting Author accepts and understands that any supply made under these terms is made by BMJ to the Submitting Author unless you are acting as an employee on behalf of your employer or a postgraduate student of an affiliated institution which is paying any applicable article publishing charge ("APC") for Open Access articles. Where the Submitting Author wishes to make the Work available on an Open Access basis (and intends to pay the relevant APC), the terms of reuse of such Open Access shall be governed by a Creative Commons licence – details of these licences and which [Creative Commons](#) licence will apply to this Work are set out in our licence referred to above.

Other than as permitted in any relevant BMJ Author's Self Archiving Policies, I confirm this Work has not been accepted for publication elsewhere, is not being considered for publication elsewhere and does not duplicate material already published. I confirm all authors consent to publication of this Work and authorise the granting of this licence.

1 COVID-19-related stigma and its influencing  
2 factors: a nationwide cross-sectional study during  
3 the early stage of the pandemic in China

4 **Tianyu Jiang<sup>1</sup>, Xudong Zhou<sup>1</sup>, Leesa Lin<sup>2</sup>, Yanzheng Pan<sup>1</sup>, Yuyuan Zhong<sup>1</sup>, Xiaomin  
5 Wang<sup>1\*</sup>, Hui Zhu<sup>3\*</sup>**

6 1 Institute of Social Medicine, School of Medicine, Zhejiang University, Hangzhou, Zhejiang,  
7 China

8 2 Department of Infectious Disease Epidemiology, London School of Hygiene and Tropical  
9 Medicine, London, UK

10 3 School of Medicine, Zhejiang University, Hangzhou, Zhejiang, China

11 \* Corresponding Author:

12 Xiaomin Wang

13 Email: xiaominwang2018@zju.edu.cn

14 Postal address: Institute of Social Medicine, School of Medicine, Zhejiang University, 866  
15 Yuhangtang Road, Hangzhou, Zhejiang Province, 310058, P.R.China

16 Phone: 86-571-88208221

17 Fax: 86-571-88208221

18 Note: Xiaomin Wang and Hui Zhu made equal contribution to this article and are both  
19 corresponding authors.

20 Word count: 3645 words

1  
2  
3 **Abstract**  
4

5 **Objectives** : To describe the situation of COVID-19-related stigma towards COVID-19  
6 patients and people from the city of Wuhan in China and to assess the associations between  
7 COVID-19-related stigma, health literacy, and sociodemographic characteristics during March  
8 2020, the early stage of the pandemic.  
9

10 **Design:** A cross-sectional online survey.  
11

12 **Setting:** The study surveyed 31 provinces in China.  
13

14 **Participants:** This study surveyed 5,039 respondents in China.  
15

16 **Outcome measures:** Public stigma towards both COVID-19 patients and Wuhan residents was  
17 measured. Binary logistic regression was used to identify the factors associated with public  
18 COVID-19-related stigma.  
19

20 **Results** : Among the participants, 122 (2.4%) reported themselves and 254 (5.0%) reported the  
21 communities they lived in as holding a stigmatizing attitude towards COVID-19 patients,  
22 respectively. Additionally, 114 (2.5%) and 475 (10.3%) reported that themselves and the  
23 communities they lived in, respectively, held a stigma against people from Wuhan, which was  
24 the most severely affected area in China. People aged over 40, lived in areas with severe  
25 epidemics (aOR=2.03, 95% CI [1.05-3.92]), and who felt it difficult to find and understand  
26 information about COVID-19 (aOR=1.91, 95% CI [1.08-3.37]; aOR=1.88, 95% CI [1.08-3.29])  
27 were more likely to stigmatize COVID-19 patients. People who were male, aged 41 to 50, and  
28 had difficulty understanding information (aOR=2.08, 95% CI [1.17-3.69]) were more likely to  
29 stigmatize people from Wuhan.  
30

31 **Conclusions** : COVID-19 patients and Wuhan residents suffered stigma at both the individual  
32 and community levels. Those who had low health literacy, who lived in areas with a large  
33 number of COVID-19 cases, and who were ethnic minorities were more likely to stigmatize  
34 others. Tailored interventions are encouraged to improve health literacy and consequently to  
35 reduce public COVID-19-related stigma.  
36  
37  
38  
39  
40  
41  
42  
43  
44  
45  
46  
47  
48  
49  
50  
51  
52  
53  
54  
55  
56  
57  
58  
59  
60



## 1 **Article Summary**

### 2 **Strengths and limitations of this study**

3 This was a rapid study to describe the situation of public COVID-19-related stigma during the  
4 early stage of the pandemic in China and assess the associations between stigma, health  
5 literacy and other factors.

6 This is a cross-sectional study with an over sampling of ethnic minorities and a balance of  
7 urban and rural residents.

8 The survey data relies on self-reporting, and therefore participants' responses may be biased  
9 due to social desirability.

### 10 **Introduction**

11 Stigma can be defined as a social label associating an individual with characteristics of  
12 prejudice and discrimination.<sup>1,2</sup> Individuals suffering from stigma often feel shamed, stressed  
13 and isolated, leading to negative changes in their health behaviors.<sup>3,4</sup> For example, individuals  
14 being stigmatized for a health condition may delay or avoid treatment, and may not seek access  
15 to health services, which compromises the outcome of their medical condition.<sup>5</sup>

16 In the field of infectious disease, stigma has been recognized as a global issue.<sup>6</sup> In recent  
17 decades, many studies concerning stigma as related to infectious diseases have been conducted,  
18 including but not limited to human immunodeficiency virus (HIV),<sup>7-9</sup> tuberculosis (TB)<sup>10-12</sup> and  
19 severe acute respiratory syndrome (SARS).<sup>13,14</sup> The relationship between knowledge and stigma  
20 is well-documented for infectious diseases prevention measures that do not require social  
21 distancing. For example, people with higher education levels and HIV-related knowledge were  
22 less likely to stigmatize HIV patients.<sup>7,15</sup> This may be due to the fact that people with more  
23 HIV-related knowledge had a better understanding that they were not likely to get infected with  
24 HIV through social interactions (such as handshake, hug, and cheek kiss). However, emerging  
25 infectious diseases that are evolving in nature and have uncertain transmission patterns often  
26 cause panic among individuals and communities, as was seen with SARS, H1N1, and COVID-  
27 19. The transmission of certain infectious diseases through social interactions can ignite public

1 stigma towards disease-related groups<sup>14</sup> following the introduction of social-distancing policies  
2 to prevent such diseases. Previous studies have noted that social distancing measures may affect  
3 the attitudes of individuals and communities towards people with stigmatizing conditions, and  
4 may lead to stigma.<sup>14,16</sup> In studies on COVID-19-related stigma, attention has been focused on  
5 stigma facing health care workers or residents in areas affected by the COVID-19 pandemic.<sup>17,18</sup>  
6 However, few studies have explored the relationship between knowledge and stigma in  
7 emerging infectious diseases that require social distancing.

8 Health literacy is usually defined as an individual's ability to obtain and process health  
9 information and take appropriate action.<sup>19</sup> Knowledge is an important dimension of health  
10 literacy.<sup>20</sup> Previous studies investigating the relationship between health literacy and stigma  
11 have mostly focused on mental illnesses and chronic diseases, and have shown that patients  
12 with low health literacy were more likely to feel stigmatized.<sup>21-23</sup> Few studies have investigated  
13 the relationship between health literacy and stigma towards infectious diseases that require  
14 social distancing in China.

15 Studies on stigma related to infectious diseases have revealed that it is not only individual  
16 patients who face stigma from infectious diseases, but that entire racial or ethnic groups who  
17 have or are perceived as having a higher likelihood of being infected can face stigmatization.<sup>24</sup>  
18 Wuhan, the capital of Hubei Province, was the most severely affected area during the COVID-  
19 19 pandemic in China. In order to control the spread of COVID-19, the Chinese government  
20 took unprecedented measures, including locking down Wuhan, and requiring all Wuhan  
21 residents who migrated to other provinces before Wuhan was locked down to receive nucleic  
22 acid tests. A considerable portion of confirmed COVID-19 cases in many provinces were  
23 imported cases from Wuhan.<sup>25</sup> Despite the government and media calling for tolerance, the  
24 development of a stigma towards residents of Wuhan was inevitable. For example, in some  
25 communities, residents of Wuhan were not allowed to enter and suffered unfair treatment.  
26 Therefore, this study explores the situation of stigma faced by COVID-19 patients and stigma  
27 faced by residents of Wuhan.

28 The aims of this study are 1) to describe the situation of public COVID-19-related stigma

1 during the early stage of the COVID-19 pandemic in China and 2) to assess the associations  
2 between stigma, health literacy, and sociodemographic characteristics.

### 3 **Methods**

#### 4 **Study design and participants**

5 The World Health Organization (WHO) declared COVID-19 as a pandemic in March 2020,  
6 and our study was conducted between 1 March and 16 March, 2020. As of 16 March, 2020,  
7 there were more than 80,000 confirmed cases in China and more than 100,000 cases globally,  
8 and during this time people in China were under strict social-distancing policies. This was a  
9 national cross-sectional survey conducted in 31 provinces, municipalities, and autonomous  
10 regions (hereafter, provinces) in China, except for Hong Kong, Macao, and Taiwan.

11 The questionnaire was developed for this study (Additional file 1). Tools to measure public  
12 COVID-19-related stigma were adapted from a previous study.<sup>26</sup> Two online focus groups were  
13 conducted to discuss the questionnaire design, with six people with public health and medical  
14 backgrounds in each group. Two independent experts with backgrounds in public health and  
15 risk communication reviewed and further developed the questionnaire. We conducted 30 online  
16 one-to-one interviews with respondents of different ages and education levels to pre-test the  
17 questionnaire. The final questionnaire included sociodemographic characteristics, public  
18 COVID-19-related stigma, and health literacy during the COVID-19 pandemic. Logic  
19 questions were set up to verify the validity of the data.

20 The respondents included in this study were aged over 16 years old and could read  
21 Mandarin. We conducted convenience sampling in 31 provinces, and 100-200 families were  
22 selected from each province. The member from each household whose birth date was closest to  
23 the survey date was invited to complete the questionnaire to ensure randomness in sampling.  
24 Younger family members were encouraged to assist elderly family members in completing the  
25 questionnaire, if necessary. Before the investigation, investigators received online trainings,  
26 and thusly they were responsible for quality control. Respondents could fill in the questionnaire  
27 by scanning QR codes or clicking the questionnaire link on smartphones, tablets and other  
28 mobile devices. A sample size of 3,062 was estimated based on a prevalence estimate of 50%,

1 the  $\pm 2\%$  margin of error and upward adjusted by 20% considering potential non-response. We  
2 set up a target sample for ethnic minorities residents and over-sampled respondents who lived  
3 in Wuhan, as it was the center of the pandemic. We intentionally balanced respondents from  
4 urban and rural areas while conducting this survey. Before completing the questionnaire,  
5 respondents were informed in the consent statement that this was an anonymous and voluntary  
6 survey. No compensation was provided to respondents. The Ethics Committee of the School of  
7 Public Health at Zhejiang University reviewed and approved this study (No. ZGL202002-3).

### 8 **Patient and public involvement**

9 Patients were not involved in the design, management or reporting of this study.

### 10 **Measurements**

#### 11 *Sociodemographic characteristics*

12 The sociodemographic characteristics comprised gender, age, education, ethnicity,  
13 urbanicity, and monthly household income. According to the data of confirmed COVID-19  
14 cases in 31 provinces officially announced by the Chinese government as of 1 March, 2020, the  
15 31 provinces were divided into four groups. Hubei province, the statistical outlier with the  
16 highest number of confirmed cases, was classified as the high-risk group. The rest of the 30  
17 provinces were divided into three groups (low-risk group, medium-risk group and medium-  
18 high-risk group), with each group containing 10 provinces based on their ranking of number of  
19 confirmed cases.

#### 20 *Health literacy*

21 Questions on health literacy about COVID-19 were adapted from previous studies<sup>27,28</sup> and  
22 measured using two questions: (1) To what extent do you agree with the following statements  
23 “it is difficult for me to find correct and comprehensive information about COVID-19,” (2) To  
24 what extent do you agree with the following statements “it is difficult for me to understand  
25 information I got about COVID-19.” Each question was answered using a 5-point Likert scale  
26 ranging from 1 to 5 (1=Strongly disagree; 2=Disagree; 3=Neutral; 4=Agree; 5=Strongly agree).

#### 27 *Stigma*

28 Questions on public COVID-19-related stigma were adapted from previous studies.<sup>26,29</sup>

1  
2  
3 1 Four questions, including public stigma towards COVID-19 patients and residents of Wuhan at  
4  
5 2 the individual and community levels were used, respectively. The study participants who chose  
6  
7 3 the following options: “It is their problem and I don’t want to get COVID-19 by trying to help  
8  
9 4 them,” and “I am afraid of them and avoid them because they may infect me,” were classified  
10  
11 5 as “stigmatized,” those who chose options “I feel compassion and desire to help,” “I feel  
12  
13 6 compassion but tend to stay away from them,” and “I have no particular feeling,” were  
14  
15 7 classified as “not stigmatized.”<sup>26</sup> People who lived in Wuhan were automatically exempted  
16  
17 8 from stigma questions related to residents of Wuhan.

### 9 **Data analysis**

10 All data were analyzed using IBM SPSS Statistics Version 23.0 for Windows. Descriptive  
11  
12 11 analyses included means for continuous variables and percentages for categorical data. Chi-  
13  
14 12 square tests were conducted to compare COVID-19-related stigma between groups. Binary  
15  
16 13 logistic regression analysis was used to examine the association of the independent variables  
17  
18 14 with COVID-19-related stigma. All comparisons were two-tailed. The significance threshold  
19  
20 15 was p-value < 0.05.

### 16 **Results**

17 The response rate of this survey was 94.7%. Of the 5,124 participants who completed the  
18  
19 18 questionnaire, 85(1.7%) were excluded because they were younger than 16 years old or  
20  
21 19 answered logical questions incorrectly. A total of 5,039 participants (Table 1) with an average  
22  
23 20 age of 33.0 (SD=12.5) were included for analysis. Most of them were female, were of Han  
24  
25 21 ethnicity, received senior high school education, had a monthly household income above 705  
26  
27 22 United States dollars (USD), and lived in a medium case area.

28 At the individual level (Table 2), the majority (70.2%) of participants reported they felt  
29  
30 23 compassion for and desired to help COVID-19 patients, 1,045 (20.7%) reported they felt  
31  
32 24 compassion for COVID-19 patients but tended to avoid them, 29(0.6%) expressed their  
33  
34 25 unwillingness to help COVID-19 patients, and 93(1.8%) expressed fear of COVID-19 patients.  
35  
36 26 Less than one percent of participants expressed their unwillingness to help residents of Wuhan  
37  
38 27 and 74(1.6%) expressed fear of residents of Wuhan. At the community level, 254(5.0%)  
39  
40 28

1 participants reported their communities rejected COVID-19 patients, and 475(10.3%)  
2 participants reported residents of Wuhan were rejected by their communities. Approximately  
3 one-third of participants reported that they had difficulties finding comprehensive and correct  
4 information about COVID-19, and 759(15.0%) of the participants reported that it was difficult  
5 to understand the information they received about COVID-19.

6 Figure 1 shows the number of cumulative confirmed COVID-19 cases from the 31  
7 provinces on the investigation data (March 1, 2020). Figure 2 illustrates the proportion of  
8 individual stigma towards COVID-19 patients in each province. People living in Hubei, Anhui,  
9 Guizhou, Tianjin and Yunnan provinces had a relatively high stigma percentage of over 4% of  
10 the population. Figure 3 shows that more than 4% of the respondents living in Guizhou, Yunnan,  
11 and Qinghai provinces expressed a stigma towards residents of Wuhan. The proportion of  
12 reported stigma towards residents of Wuhan in Henan, Shanxi, Ningxia, Chongqing and  
13 Zhejiang provinces was between 3% and 4%.

14 As shown in Table 3, the prevalence of stigma towards COVID-19 patients among people  
15 over 50 was significantly higher than that of people under 20 (5.1% vs. 1.2%,  $p < 0.001$ ).  
16 Compared with people who had a junior high school or lower degree, people with a college or  
17 higher degree reported lower levels of stigma towards COVID-19 patients (2.0% vs. 4.0%,  
18  $p=0.01$ ). Ethnic minorities showed a higher level of (3.6% vs. 2.2%,  $p=0.024$ ) stigma towards  
19 COVID-19 patients than did Han respondents. Participants who felt it was easy to find and  
20 understand information about COVID-19 expressed lower stigma towards COVID-19 patients  
21 than did those who felt it was difficult (1.4% vs. 3.7%,  $p < 0.001$ ; 1.5% vs. 4.5%,  $p < 0.001$ ).  
22 Individual stigma towards residents of Wuhan was more prevalent among male than female  
23 respondents (3.4% vs. 1.8%,  $p < 0.001$ ) and was relatively high among those who felt it was  
24 hard to understand COVID-19-related information (4.4% vs. 1.8%,  $p < 0.001$ ).

25 Logistic regression (Table 4) indicated that participants aged over 40, who were ethnic  
26 minorities (aOR=2.71, 95% CI [1.67-4.38]), and who felt it was difficult to find and understand  
27 information about COVID-19 (aOR=1.91, 95% CI [1.08-3.37]; aOR=1.88, 95% CI [1.08-3.29])

1 were more likely to stigmatize COVID-19 patients. Compared with people living in low case  
2 areas, people living in low-medium and high case areas were 1.74 and 2.03 times more likely  
3 to stigmatize COVID-19 patients, respectively. Females were found to be less likely to  
4 stigmatize residents of Wuhan when compared with males (aOR=0.55, 95% CI [0.38-0.81]).  
5 Participants aged 41 to 50 and those with difficulty understanding information (aOR=2.08, 95%  
6 CI [1.17-3.69]) were more likely to stigmatize residents of Wuhan.

## 7 **Discussion**

8 To our knowledge, there are currently few studies investigating public COVID-19-related  
9 stigma during the early stage of the pandemic in China. Our study described the situation of  
10 stigma towards COVID-19 patients and residents of Wuhan at both the individual and  
11 community levels. Consequently, our results verified the correlation between better health  
12 literacy and lower stigma during a pandemic of an emerging infectious disease and showed the  
13 difference in stigma in regions with different COVID-19 epidemic severities on a large scale  
14 across China. Additionally, we identified that sociodemographic factors, such as gender, age,  
15 and ethnicity, affected public COVID-19-related stigma.

16 Historically, infectious diseases have long been associated with stigma. During the early  
17 stage of the COVID-19 pandemic, potentially deadly conditions, the lack of effective treatments,  
18 and rumors increased the risk of stigmatization. The stigma associated with COVID-19  
19 threatens the physical and mental health of COVID-19 patients and residents of Wuhan. In the  
20 long run, stigmatization also damages the cultural fabric of society and undermines efforts to  
21 control pandemics, creating an atmosphere of fear and distrust. Previous studies identified  
22 COVID-19-related public stigma as more prevalent and severe when compared with our  
23 findings. According to a global survey involving 173 countries, nearly a third of participants  
24 believed that people talked badly or gossiped about other people who were thought to associated  
25 with COVID-19, and 21.9% of participants believed people who had COVID-19 were not  
26 respected by the community.<sup>30</sup> An online survey in February 2020 in China also showed that  
27 about half of participants reported they would avoid people from Hubei and 16.9% would even  
28 try to expel them from their communities.<sup>31</sup> The low prevalence of stigma in our study may be

1 partly explained by the fact that the Chinese government began campaigns in the media to  
2 reduce stigma towards COVID-19 patients and people from Wuhan during the early stage of  
3 the pandemic.<sup>31</sup> COVID-19-related stigma is not unique to China, and has been reported in the  
4 United States, Australia, Nepal and other countries.<sup>17</sup> These facts should remind health policy  
5 makers to attach more importance to community-based stigma reduction interventions and  
6 campaigns.

7 Our study added to the literature by exposing the negative association between health  
8 literacy and COVID-19-related stigma. Stigma can be understood as a human instinct to protect  
9 themselves from potentially fatal infectious diseases,<sup>32</sup> even though this instinctual response  
10 often leads to bias.<sup>33</sup> Lack of knowledge has been shown to be a major driver of these biases  
11 and stigmatizations. Previous studies on mental disease identified a negative correlation  
12 between health literacy and stigma.<sup>34,35</sup> Consequently, in the field of infectious diseases, higher  
13 literacy concerning one disease may possibly help reduce disease-related stigma. Our study  
14 suggested that higher COVID-19-related health literacy, specifically, a better ability to find and  
15 understand COVID-19 information, might help reduce stigma towards COVID-19 patients and  
16 residents of Wuhan. Additionally, it has been suggested that health literacy interventions, such  
17 as educational lectures to improve public knowledge and literacy, could help reduce stigma in  
18 the field of mental health.<sup>36</sup> Thus, further studies are needed to verify effective measures to  
19 reduce stigma during an emerging infectious disease, such as information campaigns from  
20 health services or the media, and sessions in workplaces and schools.

21 To reduce stigma, this study described the geographic distribution of stigma during the  
22 early stage of the pandemic to improve intervention precision by allowing for the targeting of  
23 high-stigma areas. Our research found that people in different regions held differing degrees of  
24 stigmatization. In general, provinces which were close to Wuhan, such as Anhui and Chongqing,  
25 and provinces with more ethnic minorities, such as Yunnan and Guizhou, had higher levels of  
26 stigma towards COVID-19 patients. Similarly, the proportion of respondents who held stigma  
27 towards residents of Wuhan was relatively high in provinces close to Wuhan, such as Henan,  
28 Chongqing and Shanxi, and provinces with more ethnic minorities such as Qinghai, Yunnan,



1 Guizhou and Ningxia. A study using South Korean data revealed that the risk of COVID-19  
2 increased with higher area morbidity,<sup>37</sup> and the danger appraisal hypothesis stated that an  
3 individuals' perception of danger would make them choose a safer social distance.<sup>38</sup> Another  
4 study on SARS-related stigma conducted in Hong Kong showed that living in a geographical  
5 location with a large number of cases could increase stigmatizing attitudes. Specifically,  
6 residents living on the block with the most SARS patients reported holding the highest level of  
7 stigmatizing attitudes.<sup>13</sup> During the COVID-19 pandemic, most countries around the world  
8 reported high risk perceptions.<sup>39</sup> Similarly, in our study, people living in areas severely affected  
9 by the COVID-19 pandemic were at higher risk of social interaction with potential COVID-19  
10 patients. Thus, they might have higher risk perceptions, expect to have less social interaction  
11 with potential COVID-19 patients, and therefore may hold higher levels of stigma. Interestingly,  
12 there was no significant regional differences in attitudes towards residents of Wuhan. A  
13 possible reason was that the public perceived the risk posed by COVID-19 patients to be higher  
14 than that posed by residents of Wuhan.

15 Our study also showed the influence of sociodemographic characteristics on public  
16 COVID-19-related stigma, which might help identify subgroups that are more likely to  
17 stigmatize others during the pandemic. Consistent with previous studies, we found females  
18 were more tolerant towards residents of Wuhan, while people over 40 years old and ethnic  
19 minorities were more likely to stigmatize COVID-19 patients.<sup>15,40</sup> The elderly were more likely  
20 to progress to severe disease after infection or suffer complications from COVID-19 than  
21 younger adults, and had higher perceived susceptibility and perceived severity during the  
22 pandemic,<sup>41</sup> which might explain why the elderly were more likely to hold stigmatizing  
23 attitudes. The majority of ethnic minorities in China live in less developed mountainous inland  
24 or border districts in the western region, and possess relatively low levels of education and  
25 income, which have been identified as negative influencing factors for stigma in previous  
26 studies and may partially explain their higher levels of stigmatization.<sup>42,43</sup> A previous study  
27 revealed that groups with higher education and income levels had lower levels of stigma  
28 towards patients with related diseases.<sup>22</sup> However, this difference was not found in our study.

1  
2  
3 1 One possible reason for this may be that, during the COVID-19 pandemic, China conducted a  
4  
5 2 large-scale publicity campaign through traditional and social media, such as China Central  
6  
7 3 Television (CCTV), WeChat official accounts and short video platforms,<sup>44</sup> which may have  
8  
9 4 helped reduce barriers related to education and economic status in accessing adequate  
10  
11 5 information concerning COVID-19.  
12

13  
14 6 There are some limitations to this study. First, this is a cross-sectional study, so it cannot  
15  
16 7 verify the causal relationship between stigma-related variables. Second, this is an online survey,  
17  
18 8 and people who did not have access to the Internet were not included, which may result in  
19  
20 9 selection bias. However, as of December 2020, China's Internet penetration rate was 70.4%,  
21  
22 10 and most people in China had access to the Internet via smartphones.<sup>45</sup> Third, health literacy  
23  
24 11 and stigmatizing attitudes rely on self-reporting, and may thus lead to an underestimation of the  
25  
26 12 impact of health literacy on stigma.<sup>46</sup> Fourth, we chose a snowball sampling method rather than  
27  
28 13 a representative sampling method, due to the social-distancing policies in place during our  
29  
30 14 investigation. However, we ensured both the balance of urban-rural samples and the  
31  
32 15 randomness of each sample in each household during the survey to reduce related bias. Fifth,  
33  
34 16 this study does not differentiate among participants by their profession or relationship to the  
35  
36 17 disease. It is possible that health personnel or those who have been discriminated against and  
37  
38 18 know the reality of the virus offered different responses, just as people who have been infected  
39  
40 19 may also show less stigma (although the number of people reporting infection in our surveyed  
41  
42 20 population was low).  
43  
44

## 21 **Conclusion**

22  
23 22 COVID-19 patients and residents of Wuhan have suffered stigma at both the individual  
24  
25 23 and community levels. Those who had low health literacy, who lived in areas with a large  
26  
27 24 number of COVID-19 cases, and who were ethnic minorities were more likely to stigmatize  
28  
29 25 others in the early stage of the pandemic. Although a COVID-19 vaccine is available globally,  
30  
31 26 it will still take time to achieve herd immunity. We recommend joint actions of all sectors of  
32  
33 27 our society, including but not limited to governments, health institutions, and public figures,  
34  
35 28 such as athletes, communicators and social influencers to reduce the COVID-19-related  
36  
37  
38  
39  
40  
41  
42  
43  
44  
45  
46  
47  
48  
49  
50  
51  
52  
53  
54  
55  
56  
57  
58  
59  
60

1 stigmatization. Health policy makers should include early prevention and elimination of stigma  
2 into emergency preparedness plans for infectious diseases. Community-based stigma reduction  
3 interventions targeted the ethnic minorities and those lived near the epidemic center are  
4 encouraged to support the most stigmatized groups. In addition, information campaigns to offer  
5 a better access and easy understandable messages thus to increase public health literacy of  
6 infectious diseases by medical authorities and the media are recommended.

#### 7 **Declarations**

#### 8 **Contributors**

9 XZ, XW, and HZ made substantial contributions to the study design and supervised the data  
10 collection. TJ, LL, YZ, and YP contributed to the data collection and interpretation. TJ wrote  
11 the substantial parts of manuscript. All authors critically revised, reviewed, and approved the  
12 final version the manuscript.

#### 13 **Funding**

14 This research study was supported by the National Social Science Fund of China (grant number  
15 20VYJ063) and Zhejiang University Special Scientific Research Fund for COVID-19  
16 Prevention and Control (grant number 2020XGZX045).

17 The funding body has no role in study design, data collection and analysis, decision to publish,  
18 or preparation of the manuscript.

#### 19 **Patient consent for publication**

20 Not required.

#### 21 **Data sharing statement**

22 Data are available from the corresponding author on reasonable request.

#### 23 **Competing interests**

24 The authors declare no conflict of interest.

#### 25 **Ethics approval and consent to participate**

26 The protocol for this study was approved by the Ethics Committee of the School of Public  
27 Health, Zhejiang University. No. ZGL202002-3.

#### 28 **Acknowledgements**

1 We would like to thank Jiayao Xu, Yiyi Zhou, Fangyuan Jiang, Yuling Wan for their great  
2 assistance to conduct this survey. We are grateful to data collectors for their work and all  
3 respondents for their participation in the study. We would like to thank Xianhong Huang for  
4 reviewing the data analysis.

## 5 **References**

- 6 1 Henderson C, Evans-Lacko S, Thornicroft G. Mental illness stigma, help seeking, and  
7 public health programs. *Am J Public Health* 2013;103(5):777-780.
- 8 2 Pescosolido BA. The public stigma of mental illness: what do we think; what do we know;  
9 what can we prove?. *J Health Soc Behav* 2013;54(1):1-21.
- 10 3 Zeng C, Li X, Du H, et al. Experiences of Stigma and Health Service Utilization among  
11 Young Rural-to-urban Migrants in China: The Mediation Role of Social Capital.  
12 *Vulnerable Child Youth Stud* 2020;15(2):97-109.
- 13 4 Elliot VL, Morgan D, Kosteniuk J, et al. Health-related stigma of noncommunicable  
14 neurological disease in rural adult populations: A scoping review. *Health Soc Care*  
15 *Community* 2019;27(4):e158-e188.
- 16 5 Schnyder N, Panczak R, Groth N, et al. Association between mental health-related stigma  
17 and active help-seeking: systematic review and meta-analysis. *Br J Psychiatry*  
18 2017;210(4):261-268.
- 19 6 Cobos Manuel I, Jackson-Perry D, Courvoisier C, et al. Stigma and HIV: relevant for  
20 everyone. *Rev Med Suisse* 2020;16(690):744-748.
- 21 7 Ware KB. Assessment of Pharmacy Student Perceptions Toward Common Stigmas  
22 Associated with Persons Living with HIV. *Am J Pharm Educ* 2020;84(10):ajpe7270.
- 23 8 Zeng C, Li L, Hong YA, et al. A structural equation model of perceived and internalized  
24 stigma, depression, and suicidal status among people living with HIV/AIDS. *BMC Public*  
25 *Health* 2018;18(1):138.
- 26 9 Asamoah CK, Asamoah BO, Agardh A. A generation at risk: a cross-sectional study on  
27 HIV/AIDS knowledge, exposure to mass media, and stigmatizing behaviors among young  
28 women aged 15-24 years in Ghana. *Glob Health Action* 2017;10(1):1331538.

- 1  
2  
3 1 10 George LS, Rakesh PS, Vijayakumar K, et al. Social stigma associated with TB and  
4  
5 2 HIV/AIDS among Kudumbashree members: A crosssectional study. *J Family Med Prim*  
6  
7 3 *Care* 2020;9(8):4062-4066.  
8  
9 4 11 Mukerji R, Turan JM. Exploring Manifestations of TB-Related Stigma Experienced by  
10  
11 5 Women in Kolkata, India. *Ann Glob Health* 2018;84(4):727-735.  
12  
13 6 12 Chang SH, Cataldo JK. A systematic review of global cultural variations in knowledge,  
14  
15 7 attitudes and health responses to tuberculosis stigma. *Int J Tuberc Lung Dis*  
16  
17 8 2014;18(2):168-173.  
18  
19 9 13 Lee S, Chan LY, Chau AM, et al. The experience of SARS-related stigma at Amoy  
20  
21 10 Gardens. *Soc Sci Med* 2005;61(9):2038-2046.  
22  
23 11 14 Person B, Sy F, Holton K, et al; National Center for Infectious Diseases/SARS Community  
24  
25 12 Outreach Team. Fear and stigma: the epidemic within the SARS outbreak. *Emerg Infect*  
26  
27 13 *Dis* 2004;10(2):358-363.  
28  
29 14 15 Wong LP. Prevalence and factors associated with HIV/AIDS-related stigma and  
30  
31 15 discriminatory attitudes: a cross-sectional nationwide study. *Prev Med* 2013;57  
32  
33 16 Suppl:S60-S63.  
34  
35 17 16 Fischer LS, Mansergh G, Lynch J, et al. Addressing Disease-Related Stigma During  
36  
37 18 Infectious Disease Outbreaks. *Disaster Med Public Health Prep* 2019;13(5-6):989-994.  
38  
39 19 17 Singh R, Subedi M. COVID-19 and stigma: Social discrimination towards frontline  
40  
41 20 healthcare providers and COVID-19 recovered patients in Nepal. *Asian J Psychiatr*  
42  
43 21 2020;53:102222.  
44  
45 46 22 18 Duan W, Bu H, Chen Z. COVID-19-related stigma profiles and risk factors among people  
47  
48 23 who are at high risk of contagion. *Soc Sci Med* 2020;266:113425.  
49  
50 51 24 19 Berkman ND, Sheridan SL, Donahue KE, et al. Low health literacy and health outcomes:  
52  
53 25 an updated systematic review. *Ann Intern Med* 2011;155(2):97-107.  
54  
55 56 26 20 Wei Y, McGrath PJ, Hayden J, et al. Mental health literacy measures evaluating knowledge,  
57  
58 27 attitudes and help-seeking: a scoping review. *BMC Psychiatry* 2015;15:291.  
59  
60 28 21 Mackert M, Mabry-Flynn A, Donovan EE, et al. Health Literacy and Perceptions of Stigma.

- 1  
2  
3 1 *J Health Commun* 2019;24(11):856-864.  
4  
5 2 22 Johnco C, Rapee RM. Depression literacy and stigma influence how parents perceive and  
6  
7 3 respond to adolescent depressive symptoms. *J Affect Disord* 2018;241:599-607.  
8  
9 4 23 Mackert M, Donovan EE, Mabry A, et al. Stigma and health literacy: an agenda for  
10  
11 5 advancing research and practice. *Am J Health Behav* 2014;38(5):690-698.  
12  
13 6 24 Hoppe T. "Spanish Flu": When Infectious Disease Names Blur Origins and Stigmatize  
14  
15 7 Those Infected. *Am J Public Health* 2018;108(11):1462-1464.  
16  
17 8 25 Tian S, Hu N, Lou J, et al. Characteristics of COVID-19 infection in Beijing. *J Infect*  
18  
19 9 2020;80(4):401-406.  
20  
21 10 26 Datiko DG, Jerene D, Suarez P. Stigma matters in ending tuberculosis: Nationwide survey  
22  
23 11 of stigma in Ethiopia. *BMC Public Health* 2020;20(1):190.  
24  
25 12 27 Wang X, Zhou X, Leesa L, et al. The Effect of Vaccine Literacy on Parental Trust and  
26  
27 13 Intention to Vaccinate after a Major Vaccine Scandal. *J Health Commun* 2018;23(5):413-  
28  
29 14 421.  
30  
31 15 28 Sørensen K, Van den Broucke S, Fullam J, et al. Health literacy and public health: a  
32  
33 16 systematic review and integration of definitions and models. *BMC Public Health*  
34  
35 17 2012;12:80.  
36  
37 18 29 Chowdhury MR, Rahman MS, Mondal MN, et al. Social Impact of Stigma Regarding  
38  
39 19 Tuberculosis Hindering Adherence to Treatment: A Cross Sectional Study Involving  
40  
41 20 Tuberculosis Patients in Rajshahi City, Bangladesh. *Jpn J Infect Dis* 2015;68(6):461-466.  
42  
43 21 30 Dye TD, Alcantara L, Siddiqi S, et al. Risk of COVID-19-related bullying, harassment and  
44  
45 22 stigma among healthcare workers: an analytical cross-sectional global study. *BMJ Open*  
46  
47 23 2020;10(12):e046620.  
48  
49 24 31 He J, He L, Zhou W, et al. Discrimination and Social Exclusion in the Outbreak of COVID-  
50  
51 25 19. *Int J Environ Res Public Health* 2020;17(8):2933.  
52  
53 26 32 Bhanot D, Singh T, Verma SK, et al. Stigma and Discrimination During COVID-19  
54  
55 27 Pandemic. *Front Public Health* 2021;8:577018.  
56  
57 28 33 Baldassarre A, Giorgi G, Alessio F, et al. Stigma and Discrimination (SAD) at the Time  
58  
59  
60

- 1 of the SARS-CoV-2 Pandemic. *Int J Environ Res Public Health* 2020;17(17):6341.
- 2  
3  
4  
5 1 34 Svensson B, Hansson L. How mental health literacy and experience of mental illness relate  
6  
7  
8  
9  
10 2 3 to stigmatizing attitudes and social distance towards people with depression or psychosis:  
11  
12 3 4 A cross-sectional study. *Nord J Psychiatry* 2016;70(4):309-313.
- 13  
14 5 35 Lopez V, Sanchez K, Killian MO, et al. Depression screening and education: an  
15  
16 6 7 examination of mental health literacy and stigma in a sample of Hispanic women. *BMC  
17  
18 8 36 Milin R, Kutcher S, Lewis SP, et al. Impact of a Mental Health Curriculum on Knowledge  
19  
20 9 21 and Stigma Among High School Students: A Randomized Controlled Trial. *J Am Acad  
22  
23 10 24 Child Adolesc Psychiatry* 2016;55(5):383-391.e1.*
- 25  
26 11 37 Weinstein B, da Silva AR, Kouzoukas DE, et al. Precision Mapping of COVID-19  
27  
28 12 29 Vulnerable Locales by Epidemiological and Socioeconomic Risk Factors, Developed  
30  
31 13 38 Tee YC, Earnshaw VA, Altice FL, et al. Evaluating Physicians' Intention to Discriminate  
32  
33 14 39 Dryhurst S, Schneider CR, Kerr J, et al. Risk perceptions of COVID-19 around the world.  
34  
35 15 36  
36 16 37  
37 17 38  
38 18 39 Mannarini S, Rossi A. Assessing Mental Illness Stigma: A Complex Issue. *Front Psychol*  
39  
40 19 40 2019;9:2722.
- 41  
42 20 41 Irigoyen-Camacho ME, Velazquez-Alva MC, Zepeda-Zepeda MA, et al. Effect of Income  
43  
44 21 42 Level and Perception of Susceptibility and Severity of COVID-19 on Stay-at-Home  
45  
46 22 43 Preventive Behavior in a Group of Older Adults in Mexico City. *Int J Environ Res Public  
47  
48 23 44 Health* 2020;17(20):7418.
- 49  
50 24 45 Ransing R, Ramalho R, de Filippis R, et al. Infectious disease outbreak related stigma and  
51  
52 25 46 discrimination during the COVID-19 pandemic: Drivers, facilitators, manifestations, and  
53  
54 26 47 outcomes across the world. *Brain Behav Immun* 2020;89:555-558.
- 55  
56 27 48 Zhang S, Lo EC, Liu J, et al. A review of the dental caries status of ethnic minority children  
57  
58 28 49 in China. *J Immigr Minor Health* 2015;17(1):285-297.
- 60

- 1  
2  
3 1 44 Zhong BL, Luo W, Li HM, et al. Knowledge, attitudes, and practices towards COVID-19  
4 among Chinese residents during the rapid rise period of the COVID-19 outbreak: a quick  
5 online cross-sectional survey. *Int J Biol Sci* 2020;16(10):1745-1752.  
6  
7  
8  
9 4 45 China Internet Network Information Center. Statistical report on the development of the  
10 Internet in China, 2021. Available: [https:// http://www.cnnic.net.cn/](https://http://www.cnnic.net.cn/)  
11  
12 5  
13 46 Michaels PJ, Corrigan PW. Measuring mental illness stigma with diminished social  
14 desirability effects. *J Ment Health* 2013;22(3):218-226.  
15  
16  
17

18 **Figure legends**

- 19  
20 9 Figure 1: Number of confirmed COVID-19 cases by province  
21  
22 10 Figure 2: Proportion of stigma reported towards COVID-19 patients by province (%)  
23  
24 11 Figure 3: Proportion of stigma reported towards Wuhan residents by province (%)  
25  
26  
27  
28  
29  
30  
31  
32  
33  
34  
35  
36  
37  
38  
39  
40  
41  
42  
43  
44  
45  
46  
47  
48  
49  
50  
51  
52  
53  
54  
55  
56

57 **Table 1 Sample characteristics (n=5,039)**

| Variables | N   | %    |
|-----------|-----|------|
| Age       |     |      |
| ≤20       | 774 | 15.4 |



|                                       |       |      |
|---------------------------------------|-------|------|
| 21-30                                 | 1,914 | 38.0 |
| 31-40                                 | 885   | 17.6 |
| 41-50                                 | 959   | 19.0 |
| ≥51                                   | 507   | 10.1 |
| <b>Gender</b>                         |       |      |
| Male                                  | 2,090 | 41.5 |
| Female                                | 2,949 | 58.5 |
| <b>Education level</b>                |       |      |
| Junior high school or less            | 668   | 13.3 |
| Senior high school and junior college | 2,528 | 50.2 |
| College and above                     | 1,843 | 36.6 |
| <b>Ethnicity</b>                      |       |      |
| Han                                   | 4,234 | 84.0 |
| Minorities                            | 805   | 16.0 |
| <b>Urbanicity</b>                     |       |      |
| Urban                                 | 2,492 | 49.5 |
| Rural                                 | 2,547 | 50.5 |
| <b>Monthly household income (USD)</b> |       |      |
| <422                                  | 846   | 16.8 |
| 422-704                               | 1,485 | 29.5 |
| 705-1,407                             | 1,422 | 28.2 |
| 1,408-2,815                           | 858   | 17.0 |
| >2,815                                | 428   | 8.5  |
| <b>Province by confirmed patients</b> |       |      |
| Low case area                         | 1,374 | 27.3 |
| Low-medium case area                  | 1,386 | 27.5 |
| Medium case area                      | 1,681 | 33.4 |
| High case area                        | 598   | 11.9 |

**Table 2 Stigma and health literacy during COVID-19 epidemic**

| Variables                                                    | N | % |
|--------------------------------------------------------------|---|---|
| <b>Stigma towards COVID-19 patients (n=5,039)</b>            |   |   |
| Statement closest to your feeling about people with COVID-19 |   |   |



|                                                                                     |         |       |        |         |       |        |
|-------------------------------------------------------------------------------------|---------|-------|--------|---------|-------|--------|
| Gender                                                                              |         | 3.742 | 0.053  |         | 12.25 | <0.001 |
| Male                                                                                | 61(2.9) |       |        | 66(3.4) |       |        |
| Female                                                                              | 61(2.1) |       |        | 48(1.8) |       |        |
| Age                                                                                 |         | 32.43 | <0.001 |         | 4.053 | 0.399  |
| ≤20                                                                                 | 9(1.2)  |       |        | 11(1.5) |       |        |
| 21-30                                                                               | 34(1.8) |       |        | 43(2.4) |       |        |
| 31-40                                                                               | 17(1.9) |       |        | 20(2.6) |       |        |
| 41-50                                                                               | 36(3.8) |       |        | 26(3.0) |       |        |
| ≥51                                                                                 | 26(5.1) |       |        | 14(3.0) |       |        |
| Education level                                                                     |         | 9.216 | 0.010  |         | 2.606 | 0.272  |
| Junior high school or less                                                          | 27(4.0) |       |        | 21(3.3) |       |        |
| Senior high school and junior college                                               | 59(2.3) |       |        | 59(2.5) |       |        |
| College and above                                                                   | 36(2.0) |       |        | 34(2.1) |       |        |
| Ethnicity                                                                           |         | 5.660 | 0.017  |         | 1.174 | 0.279  |
| Han                                                                                 | 93(2.2) |       |        | 90(2.4) |       |        |
| Minorities                                                                          | 29(3.6) |       |        | 24(3.0) |       |        |
| Urbanicity                                                                          |         | 0.060 | 0.807  |         | 0.129 | 0.720  |
| Urban                                                                               | 59(2.4) |       |        | 51(2.4) |       |        |
| Rural                                                                               | 63(2.5) |       |        | 63(2.5) |       |        |
| Monthly household Income (USD)                                                      |         | 5.875 | 0.209  |         | 0.481 | 0.975  |
| <422                                                                                | 20(2.4) |       |        | 20(2.4) |       |        |
| 422-704                                                                             | 47(3.2) |       |        | 38(2.7) |       |        |
| 705-1407                                                                            | 27(1.9) |       |        | 31(2.4) |       |        |
| 1408-2815                                                                           | 17(2.0) |       |        | 17(2.3) |       |        |
| >2815                                                                               | 11(2.6) |       |        | 8(2.2)  |       |        |
| Province by confirmed patients                                                      |         | 4.169 | 0.244  |         | 2.374 | 0.498  |
| Low case area                                                                       | 24(1.7) |       |        | 30(2.2) |       |        |
| Low-medium case area                                                                | 38(2.7) |       |        | 41(3.0) |       |        |
| Medium case area                                                                    | 42(2.5) |       |        | 39(2.3) |       |        |
| High case area                                                                      | 18(3.0) |       |        | 4(1.9)  |       |        |
| It is difficult for me to find correct and comprehensive information about COVID-19 |         | 19.21 | <0.001 |         | 5.448 | 0.066  |
| Disagree                                                                            | 24(1.4) |       |        | 30(1.8) |       |        |
| Neutral                                                                             | 39(2.3) |       |        | 39(2.5) |       |        |
| Agree                                                                               | 59(3.7) |       |        | 45(3.1) |       |        |
| It is difficult for me to understand information I got about COVID-19               |         | 25.87 | <0.001 |         | 16.17 | <0.001 |
| Disagree                                                                            | 43(1.5) |       |        | 46(1.8) |       |        |
| Neutral                                                                             | 45(3.1) |       |        | 37(2.8) |       |        |
| Agree                                                                               | 34(4.5) |       |        | 31(4.4) |       |        |

1 \* Participants who lived in Wuhan were automatically exempted from stigma questions related to residents of Wuhan.

Table 4 Factors associated with COVID-19-related stigma

|                                                                                                     | Individual stigma towards<br>COVID-19 patients (n = 5,039) |                                      | Individual stigma towards<br>Wuhan residents (n = 4,628) <sup>a</sup> |                                      |
|-----------------------------------------------------------------------------------------------------|------------------------------------------------------------|--------------------------------------|-----------------------------------------------------------------------|--------------------------------------|
|                                                                                                     | Model 1 <sup>b</sup><br>aOR (95% CI)                       | Model 2 <sup>c</sup><br>aOR (95% CI) | Model 1 <sup>b</sup><br>aOR (95% CI)                                  | Model 2 <sup>c</sup><br>aOR (95% CI) |
| Gender (Ref: Male)                                                                                  |                                                            |                                      |                                                                       |                                      |
| Female                                                                                              | 0.73(0.51-1.05)                                            | 0.79(0.55-1.15)                      | 0.52 (0.36-0.76) **                                                   | 0.55 (0.38-0.81) **                  |
| Age (Ref: ≤20)                                                                                      |                                                            |                                      |                                                                       |                                      |
| 21-30                                                                                               | 1.77(0.81-3.83)                                            | 1.67(0.77-3.64)                      | 1.87 (0.93-3.77)                                                      | 1.80 (0.89-3.64)                     |
| 31-40                                                                                               | 2.11(0.88-5.05)                                            | 2.08(0.87-5.01)                      | 2.17 (0.97-4.87)                                                      | 2.14 (0.95-4.81)                     |
| 41-50                                                                                               | 4.00(1.82-8.79) **                                         | 3.99(1.81-8.83) **                   | 2.34 (1.09-5.04) *                                                    | 2.34 (1.09-5.05) *                   |
| ≥51                                                                                                 | 5.21(2.31-11.73) ***                                       | 5.28(2.34-11.94) ***                 | 2.05 (0.88-4.76)                                                      | 2.03 (0.87-4.74)                     |
| Educational level (Ref: Junior high school or less)                                                 |                                                            |                                      |                                                                       |                                      |
| Senior high school and junior college                                                               | 0.85(0.51-1.42)                                            | 0.96(0.57-1.60)                      | 0.94 (0.54-1.65)                                                      | 1.06 (0.60-1.85)                     |
| College and above                                                                                   | 0.67(0.37-1.22)                                            | 0.82(0.45-1.51)                      | 0.64 (0.34-1.21)                                                      | 0.76 (0.40-1.45)                     |
| Ethnicity (Ref: Han)                                                                                |                                                            |                                      |                                                                       |                                      |
| Minorities                                                                                          | 2.68(1.66-4.32) ***                                        | 2.71(1.67-4.38) ***                  | 1.52 (0.93-2.50)                                                      | 1.52 (0.93-2.50)                     |
| Urbanicity (Ref: Urban)                                                                             |                                                            |                                      |                                                                       |                                      |
| Rural                                                                                               | 0.86(0.58-1.28)                                            | 0.87(0.58-1.30)                      | 0.97 (0.65-1.45)                                                      | 0.96 (0.64-1.44)                     |
| Monthly household income (USD) (Ref: <422)                                                          |                                                            |                                      |                                                                       |                                      |
| 422-704                                                                                             | 1.36(0.79-2.34)                                            | 1.52(0.88-2.63)                      | 1.11 (0.64-1.95)                                                      | 1.18 (0.67-2.07)                     |
| 705-1407                                                                                            | 0.82(0.44-1.52)                                            | 0.95(0.51-1.77)                      | 1.01 (0.56-1.83)                                                      | 1.11 (0.61-2.03)                     |
| 1408-2815                                                                                           | 0.92(0.45-1.88)                                            | 1.08(0.53-2.21)                      | 1.02 (0.51-2.06)                                                      | 1.14 (0.56-2.31)                     |
| >2815                                                                                               | 1.23(0.55-2.76)                                            | 1.55(0.68-3.50)                      | 1.00 (0.41-2.41)                                                      | 1.15 (0.48-2.80)                     |
| Province by confirmed patients (Ref: Low case area)                                                 |                                                            |                                      |                                                                       |                                      |
| Low-medium case area                                                                                | 1.77(1.04-3.00) *                                          | 1.74(1.02-2.96) *                    | 1.44 (0.88-2.34)                                                      | 1.40 (0.86-2.29)                     |
| Medium case area                                                                                    | 1.64(0.96-2.79)                                            | 1.61(0.94-2.74)                      | 1.10 (0.67-1.81)                                                      | 1.09 (0.66-1.80)                     |
| High case area                                                                                      | 2.15(1.12-4.13) *                                          | 2.03(1.05-3.92) *                    | 0.78 (0.26-2.29)                                                      | 0.78 (0.26-2.29)                     |
| It is difficult for me to find correct and comprehensive information about COVID-19 (Ref: Disagree) |                                                            |                                      |                                                                       |                                      |
| Neutral                                                                                             |                                                            | 1.49(0.85-2.62)                      |                                                                       | 1.20 (0.70-2.06)                     |
| Agree                                                                                               |                                                            | 1.91(1.08-3.37) *                    |                                                                       | 1.12 (0.64-1.98)                     |
| It is difficult for me to understand information I got about COVID-19 (Ref: Disagree)               |                                                            |                                      |                                                                       |                                      |
| Neutral                                                                                             |                                                            | 1.62(1.01-2.61) *                    |                                                                       | 1.40 (0.86-2.29)                     |
| Agree                                                                                               |                                                            | 1.88(1.08-3.29) *                    |                                                                       | 2.08 (1.17-3.69) *                   |

<sup>a</sup>Participants who lived in Wuhan were automatically exempted from stigma questions related to residents of Wuhan. <sup>b</sup>Model 1 was a Logistic regression analysis without considering the health literacy. <sup>c</sup>Model 2 included the health literacy to see the possible impact of health literacy on stigmatizing attitudes. \* p<0.05, \*\* p<0.01, \*\*\* p<0.001.

- 1
- 2
- 3
- 4
- 5
- 6
- 7
- 8
- 9
- 10
- 11
- 12
- 13
- 14
- 15
- 16
- 17
- 18

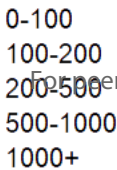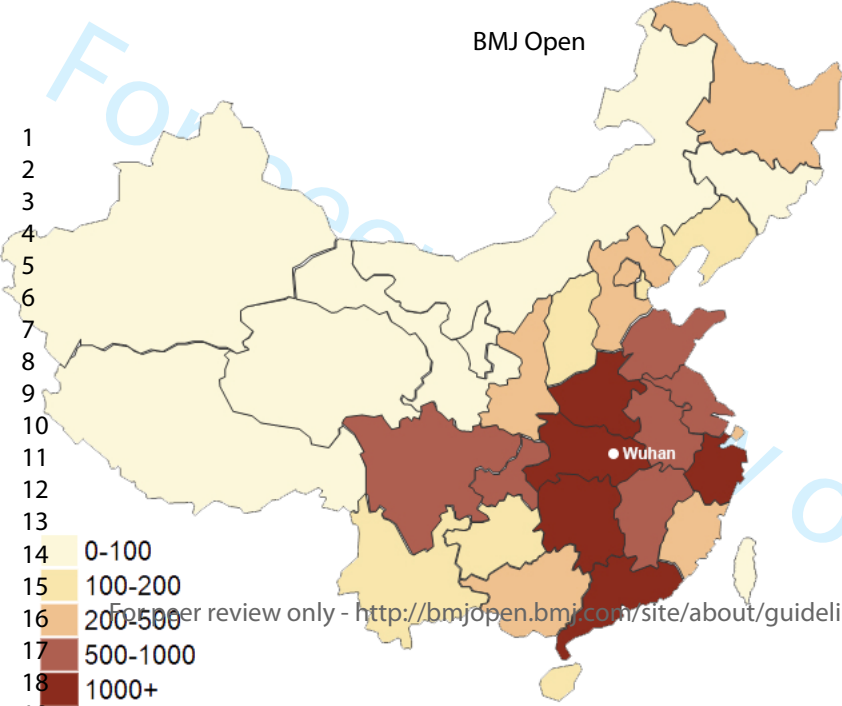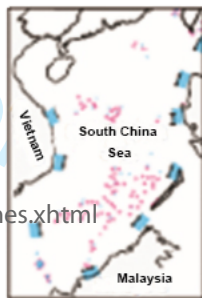

Former review only - <http://bmjopen.bmj.com/site/about/guidelines.xhtml>

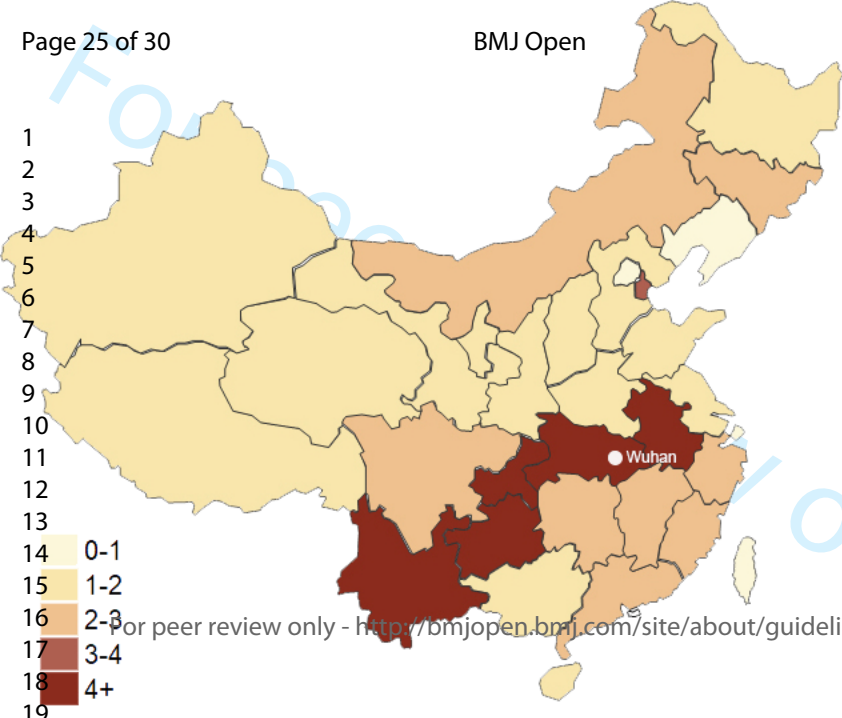

1  
2  
3  
4  
5  
6  
7  
8  
9  
10  
11  
12  
13  
14  
15  
16  
17  
18  
19

For peer review only - <http://bmjopen.bmj.com/site/about/guidelines.xhtml>

## The Questionnaire

### Part 1: The General Information

1. Gender:  Male  Female
2. Age: \_\_\_\_\_
3. Province of residence
  - Anhui  Beijing  Fujian  Gansu  Guangdong  Guangxi
  - Guizhou  Hainan  Hebei  Henan  Heilongjiang  Hubei (except Wuhan)
  - Wuhan  Hunan  Jilin  Jiangsu  Jiangxi  Liaoning
  - Inner Mongolia  Ningxia  Qinghai  Shandong  Shanxi  Shaanxi
  - Shanghai  Sichuan  Tianjin  Tibet  Xinjiang  Yunnan
  - Zhejiang  Chongqing
4. Urbanicity:  Urban  Rural
5. Ethnicity:  Han  Minorities
6. Education level:  Junior school or less  Junior high school  Senior high school  
 Junior college  College and above
7. Monthly household income:  <3000 yuan  3000-5000 yuan  5001-10000 yuan  
 10001-20000 yuan  >20000 yuan

### Part 2: Health literacy

To what extent do you agree with the following statements?

8. It is difficult for me to find correct and comprehensive information about COVID-19.  
 Strongly disagree  Disagree  Neutral  Agree  Strongly agree
9. It is difficult for me to understand information I got about COVID-19.



Strongly disagree  Disagree  Neutral  Agree  Strongly agree

**Part 3: COVID-19-related stigma**

10. Please choose a statement that closest to your feeling about COVID-19 patients.

- I feel compassion and desire to help
- I feel compassion but tend to stay away from them
- It is their problem and I don't want to get COVID-19 by trying to help them
- I am afraid of them and avoid them because they may infect me
- I have no particular feeling

11. How was COVID-19 patient usually regarded/treated in your community?

- Most people reject him/her
- Most people are friendly, but they generally try to avoid
- The community mostly supports and helps him/her
- I don't have the experience

12. Please choose a statement that closest to your feeling about Wuhan people.

- I feel compassion and desire to help
- I feel compassion but tend to stay away from them
- It is their problem and I don't want to get COVID-19 by trying to help them
- I am afraid of them and avoid them because they may infect me
- I have no particular feeling

13. How was Wuhan people usually regarded/treated in your community?

- Most people reject him/her
- Most people are friendly, but they generally try to avoid

1  
2  
3  
4  
5  
6  
7  
8  
9  
10  
11  
12  
13  
14  
15  
16  
17  
18  
19  
20  
21  
22  
23  
24  
25  
26  
27  
28  
29  
30  
31  
32  
33  
34  
35  
36  
37  
38  
39  
40  
41  
42  
43  
44  
45  
46  
47  
48  
49  
50  
51  
52  
53  
54  
55  
56  
57  
58  
59  
60

The community mostly supports and helps him/her

I don't have the experience

For peer review only

**STROBE 2007 (v4) Statement—Checklist of items that should be included in reports of *cross-sectional studies***

| Section/Topic                | Item # | Recommendation                                                                                                                                                                       | Reported on page # |
|------------------------------|--------|--------------------------------------------------------------------------------------------------------------------------------------------------------------------------------------|--------------------|
| <b>Title and abstract</b>    | 1      | (a) Indicate the study's design with a commonly used term in the title or the abstract                                                                                               | 2                  |
|                              |        | (b) Provide in the abstract an informative and balanced summary of what was done and what was found                                                                                  | 2                  |
| <b>Introduction</b>          |        |                                                                                                                                                                                      |                    |
| Background/rationale         | 2      | Explain the scientific background and rationale for the investigation being reported                                                                                                 | 3-4                |
| Objectives                   | 3      | State specific objectives, including any prespecified hypotheses                                                                                                                     | 4-5                |
| <b>Methods</b>               |        |                                                                                                                                                                                      |                    |
| Study design                 | 4      | Present key elements of study design early in the paper                                                                                                                              | 5                  |
| Setting                      | 5      | Describe the setting, locations, and relevant dates, including periods of recruitment, exposure, follow-up, and data collection                                                      | 5                  |
| Participants                 | 6      | (a) Give the eligibility criteria, and the sources and methods of selection of participants                                                                                          | 5                  |
| Variables                    | 7      | Clearly define all outcomes, exposures, predictors, potential confounders, and effect modifiers. Give diagnostic criteria, if applicable                                             | 6-7                |
| Data sources/<br>measurement | 8*     | For each variable of interest, give sources of data and details of methods of assessment (measurement). Describe comparability of assessment methods if there is more than one group | 5-6                |
| Bias                         | 9      | Describe any efforts to address potential sources of bias                                                                                                                            | 5-6                |
| Study size                   | 10     | Explain how the study size was arrived at                                                                                                                                            | 5                  |
| Quantitative variables       | 11     | Explain how quantitative variables were handled in the analyses. If applicable, describe which groupings were chosen and why                                                         | 6-7                |
| Statistical methods          | 12     | (a) Describe all statistical methods, including those used to control for confounding                                                                                                | 6-7                |
|                              |        | (b) Describe any methods used to examine subgroups and interactions                                                                                                                  | 6-7                |
|                              |        | (c) Explain how missing data were addressed                                                                                                                                          | NA                 |
|                              |        | (d) If applicable, describe analytical methods taking account of sampling strategy                                                                                                   | 6-7                |
|                              |        | (e) Describe any sensitivity analyses                                                                                                                                                | NA                 |
| <b>Results</b>               |        |                                                                                                                                                                                      |                    |

|                          |     |                                                                                                                                                                                                              |       |
|--------------------------|-----|--------------------------------------------------------------------------------------------------------------------------------------------------------------------------------------------------------------|-------|
| Participants             | 13* | (a) Report numbers of individuals at each stage of study—eg numbers potentially eligible, examined for eligibility, confirmed eligible, included in the study, completing follow-up, and analysed            | 7-8   |
|                          |     | (b) Give reasons for non-participation at each stage                                                                                                                                                         | NA    |
|                          |     | (c) Consider use of a flow diagram                                                                                                                                                                           | NA    |
| Descriptive data         | 14* | (a) Give characteristics of study participants (eg demographic, clinical, social) and information on exposures and potential confounders                                                                     | 7-8   |
|                          |     | (b) Indicate number of participants with missing data for each variable of interest                                                                                                                          | NA    |
| Outcome data             | 15* | Report numbers of outcome events or summary measures                                                                                                                                                         | 7-8   |
| Main results             | 16  | (a) Give unadjusted estimates and, if applicable, confounder-adjusted estimates and their precision (eg, 95% confidence interval). Make clear which confounders were adjusted for and why they were included | 7-8   |
|                          |     | (b) Report category boundaries when continuous variables were categorized                                                                                                                                    | 7-8   |
|                          |     | (c) If relevant, consider translating estimates of relative risk into absolute risk for a meaningful time period                                                                                             | NA    |
| Other analyses           | 17  | Report other analyses done—eg analyses of subgroups and interactions, and sensitivity analyses                                                                                                               | NA    |
| <b>Discussion</b>        |     |                                                                                                                                                                                                              |       |
| Key results              | 18  | Summarise key results with reference to study objectives                                                                                                                                                     | 8-10  |
| Limitations              | 19  | Discuss limitations of the study, taking into account sources of potential bias or imprecision. Discuss both direction and magnitude of any potential bias                                                   | 11    |
| Interpretation           | 20  | Give a cautious overall interpretation of results considering objectives, limitations, multiplicity of analyses, results from similar studies, and other relevant evidence                                   | 8-11  |
| Generalisability         | 21  | Discuss the generalisability (external validity) of the study results                                                                                                                                        | 11    |
| <b>Other information</b> |     |                                                                                                                                                                                                              |       |
| Funding                  | 22  | Give the source of funding and the role of the funders for the present study and, if applicable, for the original study on which the present article is based                                                | 11-12 |

\*Give information separately for cases and controls in case-control studies and, if applicable, for exposed and unexposed groups in cohort and cross-sectional studies.

**Note:** An Explanation and Elaboration article discusses each checklist item and gives methodological background and published examples of transparent reporting. The STROBE checklist is best used in conjunction with this article (freely available on the Web sites of PLoS Medicine at <http://www.plosmedicine.org/>, Annals of Internal Medicine at <http://www.annals.org/>, and Epidemiology at <http://www.epidem.com/>). Information on the STROBE Initiative is available at [www.strobe-statement.org](http://www.strobe-statement.org).
