# Supplementary material for: COVID-19-related stigma and its influencing factors: a nationwide cross-sectional study during the early stage of the pandemic in China
Source: PubMed Central journal article supplement — BMJ Open. 2021 Aug 13;11(8):e048983. doi: 10.1136/bmjopen-2021-048983 (PMC8366283; doi:10.1136/bmjopen-2021-048983), 2021-08-13
Supplement: bmjopen-2021-048983supp001.pdf [file bmjopen-2021-048983supp001.pdf]

## The Questionnaire

### Part 1: The General Information

1. Gender: Male Female
2. Age: \_\_\_\_\_
3. Province of residence  
Anhui Beijing Fujian Gansu Guangdong Guangxi  
Guizhou Hainan Hebei Henan Heilongjiang Hubei (except Wuhan)  
Wuhan Hunan Jilin Jiangsu Jiangxi Liaoning  
Inner Mongolia Ningxia Qinghai Shandong Shanxi Shaanxi  
Shanghai Sichuan Tianjin Tibet Xinjiang Yunnan  
Zhejiang Chongqing
4. Urbanicity: Urban Rural
5. Ethnicity: Han Minorities
6. Education level: Junior school or less Junior high school Senior high school  
Junior college College and above
7. Monthly household income: <3000 yuan 3000-5000 yuan 5001-10000 yuan  
10001-20000 yuan >20000 yuan

### Part 2: Health literacy

To what extent do you agree with the following statements?

8. It is difficult for me to find correct and comprehensive information about COVID-19.  
Strongly disagree Disagree Neutral Agree Strongly agree
9. It is difficult for me to understand information I got about COVID-19.

Strongly disagree    Disagree    Neutral    Agree    Strongly agree

**Part 3: COVID-19-related stigma**

10. Please choose a statement that closest to your feeling about COVID-19 patients.

I feel compassion and desire to help

I feel compassion but tend to stay away from them

It is their problem and I don't want to get COVID-19 by trying to help them

I am afraid of them and avoid them because they may infect me

I have no particular feeling

11. How was COVID-19 patient usually regarded/treated in your community?

Most people reject him/her

Most people are friendly, but they generally try to avoid

The community mostly supports and helps him/her

I don't have the experience

12. Please choose a statement that closest to your feeling about Wuhan people.

I feel compassion and desire to help

I feel compassion but tend to stay away from them

It is their problem and I don't want to get COVID-19 by trying to help them

I am afraid of them and avoid them because they may infect me

I have no particular feeling

13. How was Wuhan people usually regarded/treated in your community?

Most people reject him/her

Most people are friendly, but they generally try to avoid

The community mostly supports and helps him/her

I don't have the experience
